# Supplementary material for: Regulation of hippocampal mossy fiber-CA3 synapse function by a Bcl11b/C1ql2/Nrxn3(25b+) pathway
Source: eLife journal article supplement (doi:10.7554/elife.89854), 2023-08-18
Supplement: fig1-data3 [file elife-89854-fig1-data3-v1.zip]

**C**

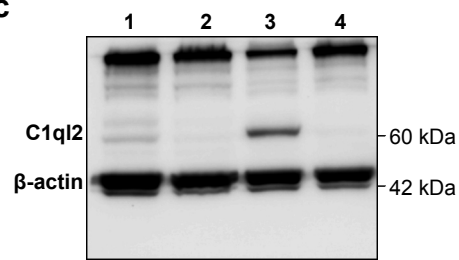

- 1: Control+EGFP
- 2: Bcl11b cKO+EGFP
- 3: Bcl11b cKO+EGFP-2A-C1ql2
- 4: Bcl11b cKO+EGFP-2A-C1ql3

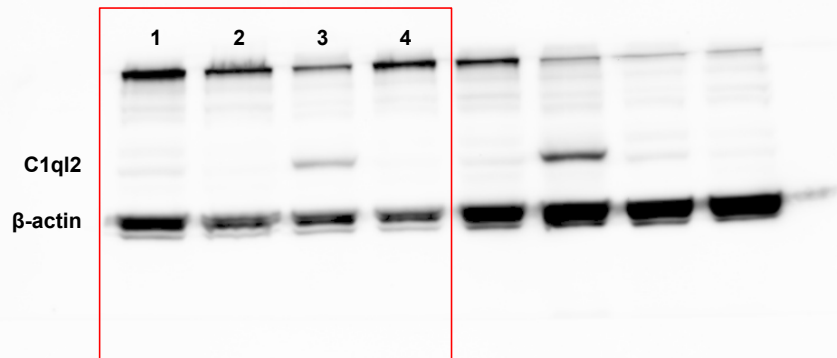

- 1: Control+EGFP
- 2: Bcl11b cKO+EGFP
- 3: Bcl11b cKO+EGFP-2A-C1ql2
- 4: Bcl11b cKO+EGFP-2A-C1ql3
