# Supplementary material for: Regulation of hippocampal mossy fiber-CA3 synapse function by a Bcl11b/C1ql2/Nrxn3(25b+) pathway
Source: eLife. 2024 Feb 15;12:RP89854. doi: 10.7554/eLife.89854 (PMC10942602; doi:10.7554/eLife.89854)
Supplement: Figure 1—source data 1. [file elife-89854-fig1-data1.xlsx]

## Sheet: Figure 1
Figure 1d
	Relative C1ql2 protein levels
	Control+EGFP	Bcl11b cKO+EGFP	Bcl11b cKO+EGFP-2A-C1ql2	Bcl11b cKO+EGFP-2A-C1ql3
animal #1	1.3607	0.155847	1.07726	0.359037
animal #2	0.614857	0.226659	3.64435	0.299703
animal #3	1.02445	0.224452	2.59182	0.21406
Mean	1	0.202319	2.43781	0.290933
SEM	0.215652	0.023245	0.745047	0.0420805
