# Supplementary material for: Regulation of hippocampal mossy fiber-CA3 synapse function by a Bcl11b/C1ql2/Nrxn3(25b+) pathway
Source: eLife. 2024 Feb 15;12:RP89854. doi: 10.7554/eLife.89854 (PMC10942602; doi:10.7554/eLife.89854)
Supplement: Figure 2—source data 1. [file elife-89854-fig2-data1.xlsx]

## Sheet: Figure 2
Figure 2b-c																		Figure 2d,f-g																	Figure 2e
	Average synapse score																		Number of docked vesicles per 100nm of AZ profile length																	Diameter of docked vesicles (nm)
	Control+EGFP			Bcl11b cKO+EGFP				Bcl11b cKO+EGFP-2A-C1ql2				Bcl11b cKO+EGFP-2A-C1ql3							Control+EGFP			Bcl11b cKO+EGFP				Bcl11b cKO+EGFP-2A-C1ql2				Bcl11b cKO+EGFP-2A-C1ql3						Control+EGFP			Bcl11b cKO+EGFP				Bcl11b cKO+EGFP-2A-C1ql2				Bcl11b cKO+EGFP-2A-C1ql3
	animal #1	animal #2	animal #3	animal #1	animal #2	animal #3	animal #4	animal #1	animal #2	animal #3	animal #4	animal #1	animal #2	animal #3	animal #4				animal #1	animal #2	animal #3	animal #1	animal #2	animal #3	animal #4	animal #1	animal #2	animal #3	animal #4	animal #1	animal #2	animal #3				animal #1	animal #2	animal #3	animal #1	animal #2	animal #3	animal #4	animal #1	animal #2	animal #3	animal #4	animal #1	animal #2	animal #3
	1	3	0	5	0	1	5	5	3	5	5	5	5	5	0				0	1.77794	0.720202	0.620347	0	0	0	0.37393	0.845737	1.3747	0.750638	0	0	0.442968				54.75	31.51	20.03	26.79	34.39	50.28	29.72	21.28	26.27	31.96	45.81	24.12	43.91	33.89
	1	3	3	1	1	5	5	5	5	5	5	5	0	4	0				0.806062	0	1.07805	0.545613	0.563095	0.675265	0	0	1.40825	1.33726	1.33923	0	0.372315	0.491811				34.04	35.59	22.39	23.61	28.58	40.01	39.1	58.74	28.68	26.79	24.12	37.23	31.96	35.79
	3	0	5	5	3	0	0	4	0	5	5	0	5	0	3				0.710581	0	0	0	0	0	0	0.404891	0	1.59847	0	0.744435	0	0				28.72	31.61	34.37	34.93	62.21	39.33	39.94	55.85	29.72	26.79	32.31	25.16	30.9	24.19
	3	1	5	5	0	5	3	3	5	5	5	0	5	5	5				0	0	0	1.14995	1.54991	0	0	0.877732	1.01497	0	1.0421	1.23747	0	0.941176				40.75	22.51	68.82	23.5	37.15	30.79	26.27	50.23	35.86	41.83	34.93	37.46	30.09	50.71
	5	1	5	1	1	5	5	5	0	5	3	5	3	5	5				0	0.54136	0.680596	0	0.380199	0	0	0.855213	0	0	0.292672	1.06803	0	0				23.69	26.49	26.91	51.53	53.83	45.81	24.05	33.64	30.63	38.25	26.79	29.25	35.24	39.79
	5	3	1	5	3	0	5	5	5	5	1	5	3	0	5				0	1.71703	0	0	0.815328	0	0	0	0.78765	0	0.91245	0	0	1.32732				44.4	27.5	68.74	34.21	46.38	52.23	35.54	56.99	27.4	29.72	40.42	28.9	36.78	26.27
	3	0	0	5	5	5	5	5	5	3	0	3	3	3	4				0	0.689941	1.29149	0	0	0.769468	0.51164	0.751625	0	0.403454	0	0.46117	0	0				31.51	46.99	38.06	30.54	50.08	44.78	55.01	42.71	29.9	52.17	41.83	29.83	30.63	29.44
	3	5	5	5	3	3	5	1	3	5	0	1	1	3	5				0.49581	0	0.983381	0	0	0	0	0	0.41365	0.720072	0	0.70922	0	0				26.29	47.22	33.37	27.05	33.38	35.94	36.63	29.25	39.87	32.64	42.36	23.18	29.9	31.35
	3	5	4	5	3	3	5	3	5	1	3	5	1	5	5				0	0	1.2832	0.507382	0.371499	0	0.596232	0.732815	1.39043	1.37874	0.405647	1.32802	0.99226	0				24.68	33.89	29.86	21.66	28.72	41.83	33.35	40.95	27.4	40.01	22.17	44.44	35.86	30.54
	5	0	5	0	5	5	0	5	5	1	1	5	0	5	4				0	0	0	0.37312	0.563031	0	0	0	0.789889	0	0.473788	0	0	0				29.89	31.35	40.06	23.96	21.01	35.24	36.44	53.27	33.23	31.52	25.41	42.19	40.22	51.58
	3	5	0	3	3	5	1	5	5	5	1	5	0	0	3				1.54273	1.0538	0	0	0.598946	0.659	1.88644	0.943752	0.707414	1.74277	0	1.16809	0.898311	0.907235				31.51	30.54	33.55	25.95	50.45	30.12	31.67	31.61	36.55	38.63	33.23	29.66	24.07	31.24
	5	5	5	3	3	5	0	5	5	5	5	5	0	1	0				0.717927	1.36659	0	0.279369	0.301368	0.574713	0.553159	0.331807	0	1.25707	0.705243	0.370439	0	0				55.01	28.39	31.49	31.61	31.61	34.01	21.16	68.08	23.26	31.45	33.64	43.35	39.94	27.4
	5	3	5	5	1	5	0	1	3	5	1	5	5	1	3				0.866889	1.69837	0	2.40587	0.586751	0	0	0	1.43308	0	0	0.653083	0	0.723589				29.25	30.09	36.11	44.89	36.78	39.33	34.41	25.16	35.55	32.31	37.88	37	30.63	23.96
	1	3	5	5	1	3	0	1	3	5	5	1	5	0	5				1.95925	0	0.877809	0	0	0	0	0.888573	0.68899	0.457938	0	0	0.403747	0.547765				24.12	32.98	60.09	23.61	30.9	35.1	29.25	42.19	28.58	30.9	44.89	34.01	53.83	33.39
	5	5	1	1	1	5	3	5	5	5	5	1	1	0	1				0.908348	0	1.61031	0.26936	0	0	0	0	1.12537	1.0381	0.390046	0.381913	0	0				41.58	32.73	55.53	22.17	21.28	50.08	33.89	48.56	22.17	33.39	38.25	38.1	34.68	33.89
	0	5	0	3	5	5	3	3	3	5	5	1	5	5	3				1.48489	0.861475	0.474518	0.61736	0.301696	0.677231	0	1.50083	1.40726	0	1.30668	1.09158	0	0				36.63	20.07	28.24	25.95	31.52	50.07	54.8	28.9	29.72	33.38	38.53	40.95	37.88	55.45
	5	3	3	5	0	1	5	1	5	5	3	5	5	5	0				0.600998	0	0.428578	0	0	0	0	0	1.1605	1.18554	0	0	0.873897	0				22.2	33.38	33.1	28.29	21.66	23.85	42.36	28.24	28.29	23.61	19.37	54.41	33.39	46.64
	5	5	0	5	5	0	5	1	3	5	0	0	0	5	3				0.585754	0.359195	0.520183	0	1.13392	0	0.974849	0.628575	0.321999	1.10926	0.848536	0.959095	0.188381	0				24.12	28.52	40.58	30.63	36.7	43.91	36.78	34.04	32.98	30.78	37.67	32.64	30.09	23.14
	5	5	3	0	5	5	5	5	0	5	1	5	0	5	0				0.617208	0.532113	0	0	0	0	0.526843	0	1.40174	0	0	0	2.52313	0				29.89	64.82	35.73	24.98	22.17	31.96	42.03	26.91	37.88	31.49	23.5	32.98	41.63	33.64
	5	3	3	2	1	1	5	5	3	5	1	4	4	5	0				0.955292	0.716615	0	0.961169	0	0	0	0.821456	1.17055	0	0	0	0.817996	0				27.32	42.75	31.83	33.89	16.61	43.32	44.58	33.55	25.41	32.88	30.09	28.68	28.19	30.63
	3	5	5	3	5	1	3	5	1	5	1	5	5	5	5				0.947059	0	0.697593	0	1.0201	0	0	0	0.65662	0	0	0	0	0				31.45	35.96	28.33	42.55	42.29	29	32.98	42.49	29.44	36.11	38.25	39.94	37.88	70.68
	3	5	5	1	4	5	5	0	1	5	0	5	5	5	3				0	0.766577	0	0.366233	0	0	0.415162	1.16918	0	0	0	0	0	0.318157				30.34	43.4	30.78	21.66	26.79	46.64	40.56	47.45	29.44	36.11	27.4	23.96	47.52	31.35
	3	5	3	0	3	5	3	3	1	0	5	1	0	5	3				0.442449	0	0	0	0	0	0.402917	0	0.296095	0	0	0	0	0				24.68	45.41	30.23	26.58	41.83	30.09	43.91	38.06	43.89	44.91	26.79	48.24	32.73	47.52
	3	1	5	5	0	3	2	3	5	0	5	3	3	5	0				0.682035	0.506449	1.20265	0	0	0	0	0	1.2222	0.498082	0	0.392372	0	0				42.19	37.77	39.94	29.06	35.32	28.78	28.78	33.38	37.88	22.58	45.13	40.87	23.93	32.64
	0	5	3	5	0	1	5	3	5	0	0	3	1	0	3				0	0	0.51717	0	0.36669	0	1.15447	0.775374	0	0.606428	0.941886	0	0	0.968242				35.86	40.75	49.79	49.84	39.85	31.51	30.54	33.38	51.58	41.58	45.62	30.54	22.11	45.62
	0	1	3	2	1	3	5	1	0	0	4	3	0	3	0				0.690655	0	0	0.892698	0	0.26814	0	0	0	0.832085	0	0	0.47619	0				18.94	35.96	31.35	28.19	40.62	23.69	40.01	47.42	35.24	42.27	53.58	30.54	38.94	38.89
	0	5	0	0	4	5	5	3	0	0	5	5	1	5	0				0.668762	0	0	0	0	0.430969	0.761151	0.835981	0.971062	0	0	0	1.00432	0				40.74	34.04	30.54	29.06	27.75	34.21	27.04	28.96	44.7	22.39	28.29	38.25	50.77	40.56
	1	5	5	0	5	5	3	1	1	5	1	0	1	5	0				0.734592	1.14877	0	0	0	0	0.728438	0	0	0.981451	0	0	0	0				22.2	39.94	48.21	37.88	49.26	33.39	30.63	23.18	35.79	28.52	38.25	29.44	32.06	23.26
	3	5	5	5	5	3	3	3	3	5	1	5	0	3	5				0.894294	0	1.07759	0	0.572688	0	1.13999	0.591261	0	0	0.487424	1.18504	0	0				33.96	31.35	32.78	42.03	18.5	25.97	51.41	31.51	40.01	33.38	35.24	30.62	41.57	24.98
	3	5	5	0	3	0	3	3	5	5	1	3	1	1	1				0.472456	1.32608	2.28154	0	0	0.733407	0.457143	0	0.583686	0	1.41403	0	0	0.72015				24.33	38.53	33.38	30.9	22.51	32.78	46.6	37.05	41.57	46.74	51.9	27.5	35.55	34.93
	0	1	5	1	2	0	1	0	5	4	3	5	3	3	2				0.75188	1.2427	0	0.450735	0	0	0	0.709975	1.23854	0	0.968851	0	0.205179	0				39.1	41.83	30.23	29.44	22.35	30.63	56.75	22.51	35.86	30.78	56.83	59.58	33.89	30.54
	5	5	5	5	3	3	1	3	5	5	0	5	1	1	5				0	0.845213	0.734107	0	0.410273	0	0	0	1.01225	1.21773	0	0	0	0.667245				34.21	48.44	23.61	55	43.53			35.49	42.36	47.8	49.63	36.11	45.62	43.32
	5	5	5	5	1	1	0	3	5	5	5	1	5	1	5				0.933184	0	0.391374	0.47221	0	0	0	1.09087	0.572607	0	0.571559	1.13263	0	1.21234				42.36	47.52	40.56	56.48	26.07			28.52	42.87	29.86	44.79	30.78	34.21	42.03
	3	5	5	5	4	1	5	5	5	3	5	1	5	5	5				0.673688	0.827792	0	0	0	0	0.604997	1.67322	0.858443	0	0	1.294	0	0				33.39	28.96	39.1	31.61	26.94			35.96	46.64	26.79	44.91	44.79	49.06	48.44
	5	0	5	5	5	3	5	3	5	5	1	3	0	5	5				1.11383	0	0.595664	0	0	0	0	0.55537	0.871802	0.716281	0	0.84969	0.884799	0.553925				25.41	40.74	36.7	50.72	31.4			31.49	34.04	26.79	47.8	24.07	36.78	31.61
	5	5	5	5	5	3	0	1	5	3	3	5	5	0	0				1.42694	0	0	0.429092	0	0	0	0.719217	0.887942	0	0.310135	0	0.297965	0.468823				35.24	43.53	39.1	31.67	26.94			30.23	36.87	36.55	37.32	24.3	25.95	49.84
	1	3	5	4	1	5	0	5	5	0	1	1	5	5	5				0	0.532481	0	0	0.60518	0	0	0	0	0	0.893735	0	0	0				23.5	44.79	48.44	21.66	25.16			36.78	43.91	29.72	47.45	28.72	36.7	30.54
	1	2	1	5	1	5	5	5	5	3	5	0	5	5	5				1.08249	1.13225	0.953425	0.628299	0.889442	0	0	0.572607	0.332513	0	0	0.350018	0	0.39692				30.09	29.86	54.5	26.58	46.4			35.24	41.83	55.45	47.21	45.69	37.32
	1	5	5	0	0	5	0	5	3	5	5	0	5	5	1				0.873668	0	1.14364	0.437963	0	0	0.339167	0	0.32079	0	0.45255	0	0.954381	0				32.64	52.33	51.69	47.57	37.32			30.09	38.85	31.67	34.41	31.67	58.3
	1	5	5	0	0	5	5	1	0	5	5	5	5	5	5				0.813802	0	0	0.676178	0	0	0	0	1.01384	0	0	0	0	0				35.35	29.83	49.56	35.86	33.38			38.14	31.51	38.06	47.19	22.88	36.47
	0	5	5	5	1	5	5	5	5	1	1	5	1	5	4				0.561514	0.316386	0	0	0	0	0	0.532245	0.628338	0	0.821963	1.01082	0.682501	0				28.3	21.09	57.79	28.58	40.06			31.51	38.5	55.26	45.41	52.91	48.89
	0	5	5	5	0	5	5	5	5	3	0	1	5	5	5				0	0	0	0.5113	0	0	0	0	0	0.635607	0	0.227118	0	0				22.51	19.05	23.55	31.96	27.53			29.83	53.94	40.2	50.85	25.7	37.67
	3	2	5	4	1	5	5	5	5	5	1	3	1	5	4				0.806712	0	0	0.562968	0.565163	0.745712	0	0.468165	1.59439	0.81248	0.291358	0.742446	0	0				27.5	20.35	33.35	25.31	34.85			47.17	35.49	29.86	60.18	42.23
	3	5	5	3	0	5	4	3	5	5	5	1	1	5	4				0	0	0.613723	1.08992	0.557072	0.705318	0.903098	0.68738	0	0	0.628338	0	0	0.363253				19.67	46.28	33.3	33.39	31.67			43.86	40.2	33.55	47.21	29.83
	3	4	5	5	5	1	5	5	5	0	5	1	5	5	5				1.39121	0	0.671862	0.82802	0.775976	0	0	0.567199	0	0	0	0	1.41483	0				59.66	37.15	52.33	30.63	43.35			76.71	35.86	30.78	49.63	26.29
	5	5	3	1	5	5	0	5	5	5	1	5	5	1	5				0.64834	0.666445	1.3459	0	0	0.276304	0	0.85034	1.01854	0.573427	0.636375	1.26374	0.653637	0				50.33	28.29	45.19	41.03	22.58			38.53	30.09	40.75	34.85	53.63
	3	1	3	1	5	1	4	5	5	5	5	1	5	5	0				0.586579	0.420221	0	0	0	0.732064	0	0	0.939099	0	0.422137	0	0	0				23.5	39.39	34.93	40.15	24.53			22.29	39.94	41.83	52.78	34.11
	5	5	5	1	5	2	0	5	5	5	5	5	5	1	0				1.15734	0	0	0.331334	0.580147	0	0.482021	0	0	1.03199	0	0.387312	0	0				34.93	49.99	52.8	37.67	26.27			38.89	21.66	26.07	30.78	66.2
	1	5	5	0	5	0	0	1	0	4	5	5	1	0	4				1.71145	0.484097	0	0	0	0	0	0.832917	0.755687	0.280002	2.1561	0	0.253633	0				32.98	42.36	66.79	26.79	38.53			41.83	43.13	26.91	31.96	28.29
	1	5	1	0	5	5	0	5	1	5	5	5	1	5	0				0.721267	0	0	0	0	0	0	0.871308	1.58403	0.927644	0	1.31718	0.437254	0.911577				29.9	30.09	59.09					19.67	30.78	30.78	37.88	31.52
	3	5	0	4	5	5	0	5	1	5	5	5	5	3	4				1.59604	0	0	0.817127	0.302939	0.604193	0	0	0	0.986582	1.45307	0	0	0.592909				37.96	28.29	35.73					22.28	32.88	42.75	25.95	45.62
	3	3	4	5	2	4	5	4	5	1	5	3	5	1	5				1.64029	0.984931	1.37325	0	0	0.37843	0.847027	0.674491	0.513875	0	0	0	1.04156	0				23.14	36.47	34.76					24.05	47.45	34.04	35.24	60.54
	1	1	5	1	5	3	1	5	5	5	5	5	0	4	5				1.74795	0	0.748615	0	0.733353	0	0	0.299276	0.869792	0	0	0	0.748279	0				33.39	36.63	31.45					35.2	30.05	30.78	42.75	53.27
	5	0	1	3	3	1	0	5	3	5	5	5	0	5	5				0.689869	0	0	0	0	0	0	0.626763	0.47995	1.10302	0.472188	0.386982	0	0				35.24	37.15	33.39					39.72	33.55	23.37	39.07
	5	1	5	0	0	3	3	5	1	3	1	5	5	0	5				0	0.912992	0	0	0	0	0	0	0	1.35612	0	0	0.334885	0				28.29	32.73	37.15					30.09	33.38	26.91	29.86
	5	1	5	5	5	3	1	5	1	0	1	5	5	0	1				1.14989	0.789702	1.57431	0.569573	0.54748	0	0.616181	0	0	0	1.00664	0	0	0				23.96	24.53	37.32					22.17	32.88	47.08	63.78
	5	5	5	0	0	0	5	1	5	5	5	2	1	5	0				0	0.686106	0.633754	0	0	0	0	0	1.01854	0.856751	0	0	0	0				23.96	31.35	33.38					23.14	37.32	28.29	30.78
	1	5	5	5	5	0	5	0	5	5	5	0	1	5	5				0.54939	0.530026	0	0.572202	0.685119	0	0	0.833542	0	1.29274	0.212983	0	0	0.668628				22.17	34.69	47.8					38.75	36.87	40.42	44.79
	5	5	5	5	5	5	4	0	5	5	3	0	0	5	5				0.885191	0	0	0	0	0	0	0.776759	1.90126	1.14489	0.880669	0	0.459031	0.380604				20.21	34.93	34.37					29.66	49.63	24.98
	5	5	5	5	5	5	0	5	3	5	5	4	2	1	1				0.89214	0	0	0.803084	0.717412	0.409383	0.309463	0	0	0.800384	0	0	0	0				21.01	38.75	38.93					26.16	35.49	28.29
	5	5	5	5	5	5	5	5	5	0	5	5	3	5	0				0	0	0.69365	0.755972	0.520562	0	0	0	0.940778	0.788022	0.464619	1.33583	0	0				54.24	25.41	37.32					20.01	49.29	26.79
	0	1	5	3	5	4	5	5	1	5	5	5	1	5	5				0.923276	0.43827	0.664364	0.508518	0	0	0	0	0	0	1.13135	0	0	0				40.01	48.44	43.91					19.93	36.11	36.7
	5	0	5	4	1	3	5	5	1	5	5	5	5	5	5				0	1.12587	0.694396	0	0.784991	0	0	0.407564	0	1.91755	0	0.569346	0	0.5134				78.95	60.22	32.31					28.78	30.78	37.67
	5	1	0	5	5	3	5	5	2	5	0	1	0	1	5				0.316907	0	0.40997	0	0	0	0	0.91954	0.659022	0	0	0	0	0				35.24	62.43						26.94	45.41	37.15
	3	0	1	4	1	0	1	5	5	5	1	0	0	0	4				1.11763	0	0	0	0	0	0.306598	0.396338	1.06918	0.786473	0.706814	0.881057	0.407465	0.207935				21.66	28.39						32.94	34.85	24.19
	1	3	5	5	0	5	5	1	5	3	3	3	5	5	5				1.23579	0	0.533276	0	0	0.423496	0	0.970874	0	0.440703	0.497512	1.28436	0	0.56373				22.29	35.55						35.2	35.55	84.58
	5	5	0	5	1	5	5	3	5	3	5	0	5	5	5				0.696233	0.780092	1.92771	0	0.460342	0	0	1.38179	1.27437	0	0.397519	0	0	0				28.68	30.54						35.92	35.94	25.42
	5	3	5	0	5	1	5	5	0	1	5	1	5	5	1				0.624493	0	0	0	0	0.932966	0	1.01471	0.721709	1.02564	0	0.434348	0.772141	0				77.85	37.59						28.9	33.64	34.37
	5	5	5	4	3	5	5	0	3	1	5	4	0	5	1				0.427789	0	1.18399	0.66921	0	0	0.422869	0	0.623403	1.26156	1.2832	0.620694	0	0				42.36	23.96						35.86	33.23	23.61
	5	5	5	5	3	4	4	5	3	3	3	5	5	0	0				0.714847	0	0	0	0	0	0	0	0	0.966277	0.924898	0	0.604997	0				48.44							25.31	47.57	26.71
	3	3	5	5	4	0	0	5	5	3	1	5	5	1	0				0.554816	0	0	0	0	0.344982	0.390976	0.424971	0.822707	0	0	0	0	0				39.1							26.79	42.55	29.86
	5	3	3	5	0	5	0	5	5	4	3	0	5	0	5				0.607238	0.835213	0	0.462749	1.10644	0	0	1.13701	0.862106	0	0.789515	0	0	0.372578				23.5							30.54	29.06	31.49
	5	1	1	0	5	4	0	5	1	5	5	0	5	1	3				0.797798	0	1.07585	0.277516	0.770119	0	0	0	0.609552	0.604047	0	0.627077	0	0				21.66							24.12	53.27	26.07
	5	5	0	5	5	4	4	5	5	3	3	5	1	0	3				1.20956	0.329663	0	0	0	0	0	0.613234	0.967305	0	0.551481	0	0	0				21.66							30.62	30.08	46.5
	0	5	0	5	5	0	4	5	4	5	3	1	5	0	1				0.545286	0	0.38909	0	0.4307	0.522903	0	1.63212	0.652401	1.00918	0	0	0.735456	1.19467				21.66							29.89	26.27	24.07
	5	5	4	3	1	1	4	5	5	5	3	5	1	5	3				1.38908	0.804764	1.14692	1.06872	0.781067	0	0.923958	0.594212	0	0	0	0	0	0				19.37							24.12	34.93	57.17
	5	1	0	0	5	5	0	5	5	5	1	5	5	0	3				0	1.61212	0.613234	0.734592	1.45858	0	0	0.463714	0.482462	0	0.398533	0	0	0				32.89							36.72	34.93	45.38
	1	5	5	3	5	1	5	5	5	5	5	0	5	5	5				1.24569	0.857265	0.338444	0	0	0	0	0	0.88574	0	0	0.626468	0	0				26.79							38.9	46.16	32.89
	5	5	5	5	5	0	0	1	5	5	1	0	5	1	3				0.815129	0.54942	0.671186	0	0	0	0.864304	0	0.578102	0.347041	0	0.852915	0	0				42.36							36.63	36.55	35.32
	4	0	5	5	5	0	0	5	5	5	5	1	1	5	3				0	0.621311	0	0.608014	0.722491	0.402706	0	0	0	0	0.945805	0	0	0				24.98							32.73	34.93
	1	5	4	5	3	5	0	3	5	5	3	0	5	5	3				0.644496	1.37868	0	0	0	0	0	0.582717	0.306251	1.09537	0.793777	0	0	0.573345				32.89							33.35	45.62
	5	1	5	5	0	5	5	4	5	1	5	1	5	0	3				0.903587	1.07591	0	0.387732	0	0.412558	0	0	0	0.446708	0.80782	0.923617	0.633072	0				46.52							40.58	37.15
	5	5	5	0	1	3	1	4	5	0	5	5	5	3	5				2.6617	0.511561	0	0	0	0	0	0	1.241	0.983478	0.724585	0	0.655996	0				45.62							53.65	38.53
	5	5	5	5	5	0	5	1	5	1	5	5	1	3	5				0.620732	0	0	0	1.15307	0.377444	0	0	0.420274	0	0.227832	0.674878	0.417449	0				20.01							38.5	48.54
	5	5	5	0	5	5	5	5	1	3	5	0	1	1	5				0.800032	0	1.04877	0.724349	0	0.594389	0.904732	0	0	1.40895	0	1.09878	0	1.34789				30.34							49.82	82.07
	5	3	0	1	5	4	3	5	5	0	5	0	5	5	5				0.33227	0	1.33923	0.877424	0	0	0.482323	1.70198	1.11607	0	0	0.471988	0.738498	0.543685				42.71							30.34	36.47
	1	3	3	2	5	0	5	0	5	5	5	0	3	5	5				0.88574	0	1.17454	1.13392	0	0	0	2.10807	0	1.51906	0.495737	0	0.553097	0				20.93							27.5	35.32
	5	1	3	3	0	5	3	5	5	1	5	5	5	0	0				0.394649	0.631951	0	0	0.284091	0.763068	0	0.613309	0	0	0.506791	0.420521	0	0				43.15								30.63
	5	3	0	0	1	3	5	5	5	0	5	5	5	0	0				0.42008	0	0.676453	0.522521	1.83234	0	0	0.456788	1.51149	0.296191	0	0	0	0				30.51								28.39
	5	0	5	0	0	3	1	5	5	0	5	1	1	1	5				0.483209	0.334504	1.71527	0	0	0	0	0	0.262398	0.990835	0	0	0	0				27.32								23.61
	5	3	1	5	3	3	5	5	5	5	3	5	3	4	5				0.718494	0	0.566813	0	0.701164	0	0	1.93386	1.83486	2.09205	0	0.589553	0.77694	0				32.31								23.61
	1	3	0	5	5	4	5	5	1	5	3	5	3	1	1				0.782718	0	0.918105	0.901713	0.5506	0.746603	0.948137	0	0	0	0	0	0	0				34.76								35.55
	3	3	4	5	0	3	1	4	1	5	5	5	0	4	1				0	0.528346	0	0	0	0	0	0	0	0	0.381922	0	0	0.623636				26.29								28.19
	3	3	5	0	4	0	3	1	5	5	5	5	1	5	0				1.41483	0	0	0.951746	0.581193	0.430552	0.980777	0.776669	1.29057	0.64317		0	0	0				48.42								33.64
	5	5	5	5	5	3	5	5	1	5	5	5	5	5	5				0.894134	0.759936	0	0.394898	0	0.201268	0	0.58651	0	0		0	0	0				22.58
	5	5	3	0	5	5	5	5	3	0	1	5	5	1	5				0	0	0.860067	0.729661	1.13546	0	0	0.867905	0.967024	0		0.309224	0	0.520644				27.75
	5	5	0	1	5	5	5	5	5	1	5	0	5	5	3				2.48633	0.424268	0	0	0	0	0.763825	0	0.528178	0.646956		0.977278	0	0				50.9
	5	5	1	5	5	1	5	0	5	5	5	0	5	0	1				0.677736	0		0.405828	0	0	0	0.68264	1.02923	0.686153		0	0.692185	0				44.44
	3	5	1	5	5	1	5	5	5	1	5	5	5	3	3				1.15989	1.09421		0	0.980296	0.82802	0.512584	1.30446	0	0		0	0	0.634759				42.19
	3	5	5	5	1	0	5	1	5	1	5	1	1	1	2				0.759417	0		0	0.411862	0	0	0	1.65948	0.686153		0	0	0				36.47
	3	5	5	3	0	0	5	5	3	4	5	1	5	5	0				0	0			0	0	0	1.16353	1.64069	0.786968		0.589484	0	0				33.39
	1	5	5	5	1	5	5	0	3	5	3	3	0	5	5				0.9994	0			0	0	0	1.22989	0	0.73692		0	0	0				29.72
	5	1	1	5	1	1	4	5	5	0	3	1	1	0	5					1.39645				0	0	1.47944		0		0.63676	0	0.291554				35.24
	5	3	1	5	5	0	5	5	1	0	1	0	0	1	5					0				0	0	1.15821		1.75485				0				43.32
	5	5	5	5	3	3	0	5	1	5	0	0	0	5	5									0	0			0				0				31.96
	5	5	5	1	1	0	5	0	3	5	1	5	1	5	5			Animal Means	0.720095	0.399264	0.46542	0.302836	0.305491	0.148767	0.206776	0.504103	0.619272	0.515975	0.381922	0.336272	0.232095	0.199928				30.09
	3	5	5	3	5	0	0	5	0	5	1	0	5	1	5			Mean	0.52826			0.240968				0.505318				0.256099						41.57
	3	5	1	1	5	0	0	5	5	5	3	5	5	5	0			SEM	0.0978004			0.0383634				0.0485859				0.0411484						34.93
	3	0	3	5	1	3	0	5	5	5	5	0	1	4	5																					51.31
	5	5	5	4	1	3	1	1	5	1	5	3	5	4	1																					44.33
	5	5	1	1	5	5	5	5	5	5	0	3	0	0	1																					43.7
	3	5	5	5	5	5	4	5	5	1	1	0	5	0	5																					38.89
	0	3	5	0	5	0	1	5	5	1	5	3	5	5	0																					43.32
	3	3	4	1	5	5	0	1	5	5	5	0	5	1	1																					40.22
	5	1	1	0	5	5	1	3	5	5	0	0	5	1	5																					24.98
	5	1	0	0	5	5	1	5	1	5	5	4	0	3	4																					28.9
	0	3	5	1	4	5	0	1	1	5	2	5	5	5	4																					18.87
	3	0	5	1	5	5	5	3	5	0	5	5	3	3	5																					35.73
	3	1	3	0	5	0	5	3	5	1	3	4	3	5	5																					24.89
	2	5	3	1	5	0	0	5	0	3	5	0	0	5	5																					21.58
	5	5	5	5	4	0	0	1	1	5	3	5	0	5	5																				Animal Means	33.514	36.1154	39.2797	32.849	33.6529	36.9252	37.2965	35.0986	36.2887	34.7772	39.2231	36.456	36.7557	36.7481
	1	5	5	5	5	0	3	5	3	5	3	1	1	3	5																				Mean	36.303			35.1809				36.3469				36.6533
	1	1	0	3	5	5	3	0	5	5	5	1	5	3	5																				SEM	1.66705			1.12882				1.01234				0.0986489
	5	3	1	3	0	1	5	1	5	5	5	0	1	3	5
	1	5	5	1	3	5	5	1	3	5	1	1	5	0	1
	0	5	5	0	0	5	0	3	1	5	1	5	0	3	0
	0	1	5	5	5	5	0	3	1	1	5	3	5	5	2
	5	0	5	5	1	5	1	3	3	0	1	1	5	5	3
	5	0	0	0	1	0	4	1	0	3	5	3	4	3	0
	3	5	3	5	1	5	5	1	0	5	5	3	5	1	5
	5	5	3	0	1	5	1	5	5	5	1	1		1	5
	5	5	5	0	5	0	0	5	5	5	5	5		5	0
	5	5	5	1	2	5	0	5	5	1	5	5		5	3
	5	5	0	0	3	1	3	1	5	5	5	5		5	5
	4	5	1	0	2	1	5	0	0	5	0	5		5	5
	5	3	3	0	0	3	5	3	0	5	5	5		1	5
	5	5	3	2	1	3	3	5	5	1	3	5		5	5
	1	1	0	3	5	2	5	3	5	5	5	0		3	5
	3	0	5	5	5	0	0	1	5	5	1	0		5	5
	5	5	5	5	3	5	0	5	0	0	3	5		5	5
	3	0	1	0	5	5	5	5	3	5	5	3		0	1
	3	5	3	0	5	5	1	5	3	5	5	3		0	0
	3	5	5	0	0	1	0	5	0	5	5	5		0	3
	3	5	5	0	0	5	5	5	5	5	0	5		1	3
	5	3	5	3	3	5	5	5	5	3	2	5		1	4
	3	3	5	3	4	5	5	1	0	3	3	4		4	5
	3	3	0	5	5	3	0	0	5	1	5	0		4	1
	5	1	0	5	4	3	0	5	5	5	3	1		5	1
	5	3	5	0	5	4	5	0	3	5	5	0		1	5
	1	5	5	2	5	3	5	5	5	5	5	1		0	5
	5	5	1	3	5	0	1		5	5	3	0		0	5
	5	4	0	5	3	3	5		0	5	5	2		0	5
	0	0	0	5	5	3	0		5	5	1	2		0	5
	4	0	0	5	5	0	5		5	5	5	5		1	1
	5	0	1	4	5	3	5		1	1	5	3		3	0
	5	3	5	4	5	5	5		5	5	0	2		1	1
	0	5	5	5	1	5	1		3	5	5	1		2	3
	5	5	5	5	1	5	0		3	1	5	0		0	3
	5	5	3	4	1	5	5		5	5	5	0
	3	0	5	5	1	5	3		5	3	0	0
	1	5	5	5	0	1	1		5	5	5	5
	0	4	5	5	1	5	5		5	5	4	5
	3	5	0	1	3	5	1		3	3	5	5
	3	5	5	3	3	1	0		3	3	5	5
	5	5	0	5	1	1	5		5	3	5	5
	5	5	0	5	3	5	1		1	0	5	1
	1	0	3	2	0	5	0		5	0	5	5
	5	1	4	0	3	5	3		3	5	5	4
	5	3	5	5	3	5	3		0	0	5	1
	5	2	5	4	3	4	2		1	5	4	5
	5	5	5	5	0	5	5		0	5	5	1
	5	4		5	5	5	0		5	0	0	0
	5	5		5	0	1	0			5	3	0
	5	0		0	5	1	0			5	1	5
	5	5		0	3		0			5	3	5
	5			1	3		5			5	1	3
	2			3	3		5			5	3	1
	5			0	2		5			3	3	5
	5			5	3		5			3	3	5
	5			5	0		1			5	2	1
	1			5	0		0			5	3	5
	0			0	3		1			5	2	5
	0			4	3		5			5	5	3
				5	3		0			5	3
				0	5		3			5	0
				1	1		1			5	0
				1	5		5			1	5
				3	1		5			1	3
				1			5			3	0
				0			5			1	1
				1			5			0	1
				0			4			0	5
				0			5			1	5
				4			5			5	5
				5			5			1	1
				1						5	5
				0						1	5
				0						0	3
				3						5
				3						3
				5						1
				5						3
				3						0
										5
										5
										5
										3
										3
										5
										5
										5
										3
										5
										3
Animal Means	3.40984	3.41143	3.37427	2.89655	2.96277	3.06322	2.93333	3.50667	3.48837	3.53738	3.34343	2.85792	2.93846	2.93038	3.14557
Mean	3.39851			2.96136				3.46896				2.96808
SEM	0.0121298			0.0374398				0.0430475				0.0618706

## Sheet: Fig 2 -Sup Fig 1
Figure 2-Supplement Figure 1b							Figure 2-Supplement Figure 1c																	Figure 2-Supplement Figure 1d												Figure 2-Supplement Figure 1f
	Relative C1ql3 mRNA levels							Active Zone length (nm)																	vGlut1+/Homer1+ puncta												MFB Perimeter/Area
	Control+EGFP	Bcl11b cKO+EGFP	Bcl11b cKO+EGFP-2A-C1ql2	Bcl11b cKO+EGFP-2A-C1ql3				Control+EGFP			Bcl11b cKO+EGFP				Bcl11b cKO+EGFP-2A-C1ql2				Bcl11b cKO+EGFP-2A-C1ql3						Control+EGFP			Bcl11b cKO+EGFP			Bcl11b cKO+EGFP-2A-C1ql2						Control+EGFP					Bcl11b cKO+EGFP					Bcl11b cKO+EGFP-2A-C1ql2
animal #1	0.968598	1.12037	1.13077	2.33589				animal #1	animal #2	animal #3	animal #1	animal #2	animal #3	animal #4	animal #1	animal #2	animal #3	animal #4	animal #1	animal #2	animal #3				animal #1	animal #2	animal #3	animal #1	animal #2	animal #3	animal #1	animal #2	animal #3				animal #1	animal #2	animal #3	animal #4	animal #5	animal #1	animal #2	animal #3	animal #4	animal #5	animal #1	animal #2	animal #3
animal #2	0.959687	1.06977	0.464571	1.13601				146.93	112.49	138.85	322.4	87.22	95.18	125.33	267.43	118.24	218.23	133.22	232.14	111.57	225.75				25	52	58	94	78	66	61	60	67				0.00345524	0.00452259	0.00515878	0.00446625	0.0056806	0.00366603	0.00564394	0.00294934	0.00493152	0.00403098	0.00355358	0.00574585	0.00385908
animal #3	1.01911	1.39859	1.01911	13.8707				124.06	129.45	92.76	183.28	177.59	148.09	93.5	130.87	142.02	74.78	74.67	70.04	268.59	203.33				39	78	86	35	76	110	86	100	36				0.00655405	0.00800771	0.00357024	0.00434264	0.00694241	0.00425983	0.00825686	0.00487259	0.00297147	0.00467477	0.00368023	0.0027259	0.00433892
animal #4	1.05261	0.783119	0.860931					140.73	205.98	126.86	192.8	82.63	204.43	65.18	246.98	170.41	187.68	328.59	134.33	157.52	204.75				29	54	150	21	27	65	89	111	22				0.0043498	0.00298087	0.00537672	0.00225298	0.00619023	0.0057306	0.00322132	0.0034622	0.00488108	0.00339389	0.00339268	0.00527954	0.00276176
Mean	1	1.09296	0.868844	5.78087				211.39	159.21	342.28	86.96	64.52	129.43	210.64	227.86	197.05	155.83	95.96	80.81	134.2	106.25				75	95	75	47	37	51	118	100	25				0.00394716	0.0062019	0.00730588	0.00509536	0.00581126	0.00277173	0.00470446	0.00458773	0.00472146	0.00817587	0.00411293	0.00330728	0.00314425
SEM	0.0218783	0.126062	0.145683	4.05973				146.47	184.72	146.93	93.57	263.02	52.54	121.11	116.93	91.66	57.79	341.68	93.63	121.52	144.93				94	125	79	57	55	67	115	92	40				0.00675513	0.00626472	0.00812617	0.00503092	0.0069958	0.00328163	0.00299424	0.00333276	0.0030055	0.00536597	0.00300535	0.00361605	0.00309052
								233.59	116.48	183.64	114.77	122.65	108.49	227.09	130.82	126.96	265.18	219.19	74.1	75.66	150.68				44	130	42	39	26	71	66	33	44				0.00569373	0.00362246	0.00485592	0.00362167	0.00475828	0.00539972	0.00321998	0.0038845	0.00313194	0.00288614	0.00438874	0.00434188	0.0020074
								113.55	144.94	77.43	58.03	61.81	129.96	195.45	266.09	126.96	247.86	176.91	216.84	94.57	231.12				80	156	94	76	108	44	50	49	79				0.00280539	0.00391997	0.00590814	0.00499695	0.00556066	0.00292484	0.00496173	0.00372075	0.00455151	0.00449326	0.00603581	0.00414756	0.00300439
								201.69	214.72	101.69	135.3	123.19	90.11	137.98	309.42	241.75	277.75	159.11	141	157.96	81.33				72	138	89	54	58	61	65	33	101				0.00786914	0.00437597	0.00677926	0.00289955	0.00580051	0.00296114	0.00470823	0.00326474	0.00509133	0.00326937	0.00358317	0.00627267	0.003336
								97.04	282.01	77.93	197.09	269.18	101.81	167.72	136.46	71.92	72.53	246.52	150.6	201.56	208.74				89	124	95	100	51	62	56	59	58				0.00370464	0.00267856	0.00827345	0.00410798	0.00582912	0.00405729	0.00329779	0.00245978	0.00660245	0.00314169	0.0041461	0.00378467	0.0034765
								353.22	139.1	77.65	268.01	177.61	111.39	133.51	104.66	126.6	95.72	422.13	113.75	149.5	139.94				35	172	38	28	51	40	79	22	23				0.00625402	0.00367438	0.00322544	0.0053863	0.00527846	0.00400544	0.0038676	0.00355532	0.00422876	0.00381797	0.00383136	0.00401006	0.00294463
								64.82	189.79	122.88	205.28	166.96	303.49	53.01	105.96	282.72	57.38	319.63	85.61	111.32	220.45				42	170	36	47	70	36	92	89	26				0.003998	0.00641965	0.00365612	0.00440131	0.00520633	0.00552872	0.00408747	0.00518279	0.00393661	0.00434464	0.00289128	0.00371094	0.00461454
								139.29	146.35	113.58	357.95	331.82	174	180.78	301.38	191.71	79.55	567.18	269.95	227.76	74.78				32	56	81	24	35	57	86	91	17				0.00743574	0.00263855	0.00586384	0.00343537	0.00512075	0.0047264	0.00394897	0.00255733	0.00402001	0.00292609	0.00475216	0.00234959	0.00244409
								230.71	58.88	82.84	83.13	170.43	129.9	312.58	96.15	69.78	195.56	257.69	153.12	117.85	138.2				61	117	89	39	23	67	75	24	26				0.00567412	0.00628919	0.00368014	0.00470048	0.00586768	0.00329462	0.00422642	0.00375723	0.00359857	0.00645641	0.00462104	0.00222247	0.0032604
								102.08	131.91	227.84	85.52	123.66	93.79	122.11	112.54	145.14	218.37	83.27	81.74	247.68	182.56				101	90	87	55	62	90	70	27	29				0.00495119	0.00363538	0.00562919	0.00365402	0.0098017	0.0050477	0.00396255	0.00521989	0.00349499	0.00476572	0.00423737	0.00265912	0.00230827
								110.09	125	186.3	371.25	94.07	146.91	210.95	308.72	88.86	96.33	256.38	261.84	159.99	98.79				69	67	67	29	29	37	46	94	39				0.00448879	0.002783	0.00623385	0.00611132	0.00540465	0.00447504	0.00311823	0.0038374	0.00310468	0.00714781	0.00333235	0.00260696	0.0025316
								134.69	116.08	210.74	161.98	331.46	147.66	135.07	66.63	284.24	223.65	76.53	91.61	159.08	176.46				153	34	54	56	46	52	36	33	24				0.00379812	0.00598737	0.00439671	0.00402151	0.00630458	0.00490236	0.00644817	0.00422327	0.00288895	0.00361076	0.00455662	0.0042679	0.00262917
								166.39	129.22	233.33	198.99	58.03	159.65	222.98	102.88	86.17	168.7	33.23	103.67	114.43	122.56				135	178	56	75	42	60	89	49	34				0.00525206	0.00451009	0.0047615	0.00355562	0.00827214	0.0045866	0.00650564	0.00411784	0.00634268	0.00324448	0.00479631	0.00504653	0.00165536
								170.72	278.4	192.24	68.3	88.19	69.27	102.58	159.09	310.56	270.45	235.7	208.53	530.84	171.26				80	52	74	78	23	62	103	63	46				0.0038701	0.00472005	0.00457698	0.00478609	0.00444426	0.00209572	0.00351968	0.00311727	0.00483767	0.00385953	0.00397214	0.00391166	0.00257131
								324.04	187.93	115.74	93.54	151.02	147.28	189.81	139.76	71.34	109.35	78.25	64.36	118.9	153.44				43	136	98	25	51	56	38	21	63				0.00471174	0.00668538	0.00299069	0.00453708	0.00504766	0.0029788	0.00458981	0.00519232	0.00552224	0.00294814	0.00398627	0.0029877	0.00203532
								209.36	279.09	100.66	104.04	185.33	144.12	167.35	243.47	85.43	109	81.21	173.97	122.25	313.19				37	84	113	20	66	69	101	33	43				0.00546213	0.00563227	0.00510678	0.00343572	0.00527264	0.00356613	0.00303372	0.00549871	0.00265712	0.00494283	0.00381533	0.00549496	0.00305387
								211.18	104.83	143.35	93.8	98.03	154.22	236.7	159.67	304.59	91.12	152.16	107.19	77.93	108.31				33	101	44	30	44	48	87	27	38				0.00438901	0.00322106	0.00320818	0.00380296	0.00936582	0.0031728	0.00533975	0.00318985	0.00366642	0.00348643	0.00395582	0.0055874	0.00197437
								120.98	130.45	161.99	273.05	159.16	85.19	240.87	85.53	34.21	158.63	140.19	183.23	118.55	314.31				118	94	134	34	19	96	73	39	21				0.00499263	0.00365046	0.00348386	0.00593484	0.00707395	0.00450939	0.00499317	0.00431918	0.00309793	0.00649315	0.00428414	0.00329843	0.00231359
								452.03	174.05	122.12	267.61	262.57	322.55	248.19	131.68	337.73	56.75	210.56	92.17	98.79	299.16				80	165	77	65	23	81	61	121	51				0.00432558	0.00872177	0.00259527	0.00435251	0.00661503	0.00284378	0.00510629	0.00364272	0.00617668	0.00482926	0.00402169	0.00324707	0.00289197
								146.62	592.36	83.15	73.74	162.18	295.54	177.96	183.08	163.64	200.77	21.01	254.86	98.18	81.97				40	96	50	46	53	81	143	66	87				0.00491658	0.00837301	0.00432259	0.00309222	0.00684086	0.00330643	0.00298393	0.00328198	0.00381666	0.00378215	0.0038129	0.00537966	0.00418329
								211.54	116.68	193.36	98.03	272.71	147.48	86.62	128.97	129.88	164.9	106.17	193.64	116.06	103.28				84	82	100	101	40	37	50	34	45				0.00433026	0.00652988	0.00451958	0.00458019	0.0097299	0.00372491	0.00376434	0.0024869	0.00270055	0.00488652	0.00405326	0.00342584	0.00241695
								144.79	127.12	107.64	112.02	169.47	372.94	147.64	207.72	40.01	120.18	214.48	84.38	210	172.07				148	89	85	24	92	69	36	76	50				0.00328099	0.00528824	0.00486636	0.00443875	0.00890921	0.00327531	0.00619301	0.00600418	0.00576078	0.00483506	0.0030849	0.0034985	0.00271771
								149.53	89.08	80.41	171.9	119.83	464.07	131.38	358.86	102.98	111.42	118.9	55.19	99.57	184.3				106	112	67	76	41	34	107	121	52				0.0043328	0.0054531	0.00553918	0.00311711	0.00371617	0.00446692	0.0032498	0.00275101	0.00443987	0.00312547	0.00513382	0.00359123	0.00376045
								136.13	87.05	577.94	175.95	64.98	168.12	137.28	321.9	102.98	101.89	197.76	231.34	153.75	126.93				48	135	86	49	63	92	32	45	23				0.004782	0.00607224	0.00554741	0.00260987	0.0056671	0.005003	0.00394626	0.00399564	0.00372441	0.0047536	0.00543145	0.00282611	0.00183204
								111.82	114.19	92.8	79.88	349.23	353.97	87.72	169.13	91.39	133.53	205.16	168.77	113.56	93.57				32	75	61	68	62	103	61	40	24				0.00601897	0.00737947	0.00493868	0.006612	0.00548468	0.00391393	0.00892217	0.00436709	0.00568172	0.00351881	0.00374332	0.00406446	0.00341579
								211.66	150.82	87.66	146.8	90.66	136.35	218.75	121.84	342.65	107.32	70.72	240.78	188.36	138.86				32	112	37	48	87	72	61	43	43				0.00505717	0.00638017	0.00784407		0.00300917	0.0034067	0.00731857	0.00250186	0.00298443	0.00219039	0.0029792	0.00382425	0.00489353
								266	80.47	140.13	221.86	33.23	132.6	104.72	140.85	80.74	98.2	206.43	129.52	487.38	181.29				45	56	97	61	21	72	36	69	18					0.0057877								0.00307278
								74.78	354.94	136.22	195.07	243.74	151.65	188.71	167.05	98.79	82.12	157.22	116.61	229.72	149.87				87	53	106	64	70	53	53	35	23					0.00418512
								214.32	120.77	255.51	211.77	89.96	123.61	74.03	91.67	174.64	105.83	174.96	88.29	188.62	164.97				77	87	68	52	28	73	41	43	6					0.00674265
								445.31	362.41	157.22	87.31	86.26	125.31	165.29	119.53	116.49	103.36	75.92	77.28	198.08	204.98				42	216	64	111	14	62	70	81	20			Animal Means	0.00491521	0.00525257	0.00507803	0.00425447	0.00620005	0.00392945	0.00467114	0.00384447	0.004219	0.00427322	0.00403971	0.00390774	0.00298224
								89.78	210.54	167.88	167.81	66.16	76.27	326.52	180.06	229.41	139.61	107.51	117.69	226.04	180.53				62	112	55	111	40	100	81	50	12			Mean	0.00514007					0.00418746					0.00369876
								140.16	132.73	247.75	233.05	146.88	104.29	61.17	139.04	112.62	97.64	322.44	125.09	335.61	213.3				63	81	119	71	20	71	48	40	17			SEM	0.000314239					0.000146031					0.000212887
								196.02	187.8	101.22	301.65	165.24	73.52	199.87	99.97	103.06	206.52	223.78	109.7	116.49	208.62				90	137	55	48	88	19	102	99	39
								92.38	176.64	209.77	159.16	112.43	106.09	312.34	174.64	300.74	120.95	63.48	285.7	202.64	251.94				116	114	49	76	90	105	30	42	63
								343.38	169.72	87.44	228.33	139.1	94.54	294.84	50.33	311.73	14.54	220.97	67.65	104.78	102.71				37	97	74	41	77	73	69	72	15
								245.76	131.07	83.33	147.89	110.83	134.37	199.47	128.86	197.27	132.6	91.63	263.15	355.9	219.67				89	116	108	35	17	82	51	29	22
								178.09	316.07	137.98	202.85	62.69	86.66	326.17	563.65	159.15	57.05	243.32	98.93	146.52	83.03				90	156	110	62	22	90	54	78	53
								202.43	129.2	320.97	195.58	108.18	159.86	180	267.16	117.37	157.33	187.39	440.3	267.9	359.5				77	109	85	47	12	27	75	57	26
								123.96	185.05	138.22	177.63	176.94	134.1	37.96	213.6	62.72	246.16	343.22	134.69	86.65	109.02				73	144	76	26	52	77	22	83	30
								185.12	129.72	162.94	91.75	179.51	141.78	110.73	145.48	69.71	44.54	159.15	95.51	269.57	275.29				65	144	117	22	60	97	54	130	26
								71.88	88.67	148.84	120.77	128.87	77.11	119.83	352.61	91.67	169.23	144.26	134.49	70.68	258.37				92	108	110	37	56	72	72	48	46
								154.24	150.05	74.3	150.39	60.14	361.92	106.17	117.6	98.18	174.39	471.42	158.26	152.99	280.95				71	128	94	65	124	67	54	63	55
								170.48	237.97	182.14	89.93	78.98	136.6	114.19	280.25	212.97	87.05	236.89	113.39	117.48	248.17				89	51	169	113	73	66	72	53	121
								172.81	99.09	116.69	301.81	172.37	275.68	207.46	91.24	132.6	193.8	138.85	258.19	156.71	109.85				85	88	105	68	106	53	93	56	35
								116.86	206.57	112.72	133.59	104.34	94.01	208.79	120.06	132.33	357.14	46.38	105.31	394.27	135.56				70	130	43	59	64	78	86	68	31
								277.29	137.64	92.02	100.45	88.07	116.2	1038.99	114.77	63.13	107.8	75.69	75.92	228.7	109.7				74	160	79	83	77	62	76	193	80
								125.31	116.89	103.77	122.38	330.1	165.51	120.65	161.18	61.67	101.36	68.82	124.88	67.2	168.66				104	55	71	61	57	54	82	142	87
								121.93	101.53	72.82	140.52	152.7	264.25	118.06	148.26	194.6	142.8	105.41	313.83	192.02	152.19				130	68	58	89	35	91	68	47	58
								57.21	78.98	133.58	145.69	136.36	47.21	139.94	334.14	114.97	45.62	74.12	92.32	133.64	104.02				188	117	72	91	67	121	64	25	79
								289.91	126.63	284.16	117.85	123.99	168.02	77.07	159.55	416.71	90.66	211.78	258.41	192.41	81.96				118	112	56	51	27	83	76	60	28
								154.52	109.53	164.26	109.85	117.03	195.89	260.84	492.24	260.39	73.74	155.33	171.65	298.61	228.01				93	91	81	74	112	51	60	24	35
								173.93	126.63	63.52	175.57	365.31	103.97	324.58	177.85	101.7	62.03	99.34	229.67	133.52	153.31				93	104	100	34	94	32	79	12	45
								139.71	291.5	157.79	82.2	170.52	116.6	131.91	209.52	98.18	116.72	330.12	174.89	123.42	459.4				39	71	92	20	135	22	110	31	21
								546.06	188.67	180.55	524.29	145.96	166.05	47.52	119.97	219.55	154.71	469.52	194.4	163.47	149.56				95	131	107	106	23	100	29	46	37
								112.97	113.82	109.35	196.4	125.33	126.9	66.33	128.74	157.79	174.69	113.55	192.35	217.85	262.74				94	106	108	105	16	103	62	38	98
								224.18	118.36	132.07	124.52	139.39	244.27	323.14	125.86	72.22	249.88	109.88	153	119.04	116.08				128	149	74	64	48	72	40	30	53
								232.59	324.5	288.33	132.28	192.1	174.2	129.03	92.66	212.59	126.9	215.23	74.86	153.7	204.13				115	49	107	38	59	66	53	70	32
								108.31	228.17	752.6	196.65	59.46	213.68	119.64	139.09	112.22	150.04	88.39	81.59	66.19	234.73				146	71	106	74	52	69	60	71	30
								114.64	88.82	144.01	120.98	127.39	211.04	138.8	245.36	96.81	52.15	255.59	175.64	113.83	194.78				101	92	56	36	86	52	41	27	18
								315.55	286.1	243.92	153.44	83.89	202.78	136.45	326.25	151.74	173.63	210.34	119.4	116.82	116.71				146	140	61	29	69	99	37	87	60
								178.95	87.22	138.7	154.38	170.57	107.3	326.16	252.31	93.53	254.3	141.48	113.5	245.42	480.92				185	138	57	43	59	71	58	49	51
								161.84	132.91	187.52	66.71	193.07	236.13	80.81	103	73.52	226.91	201	77.86	161.69	177.39				96	151	55	49	48	67	99	40	48
								143.63	128.19	103.75	88.84	217.23	227.22	90.38	72.37	156.94	96.81	251.56	121.52	223.65	76.42				130	105	65	45	85	107	99	37	29
								160.13	115.13	113.1	127.8	78.49	214.37	94.07	98.55	277.12	97.5	80.19	230.23	129.51	121.29				116	100	97	80	97	69	90	80	61
								233.76	138.2	84.46	149.43	251.06	167.17	236.48	103.51	160.41	237.8	77.93	161.11	166.59	234.53				76	118	100	47	54	106	63	75	90
								139.89	127.22	171.71	202.69	112.96	79.58	282.03	102.81	104.78	103.49	108.12	180.39	165.29	275.31				110	120	58	65	59	93	51	31
								360.48	69.38	162.98	161.4	110.97	289.87	255.77	235.31	243.1	152.95	158.32	138.01	208.21	179.34				129	89	76	64	54	105	26	125
								164.68	119.73	104.02	216.1	90.38	157.86	85.71	87.95	231.99	146.68	126.66	74.65	147.48	268.4				99	67	67	58	30	75	31	93
								250.69	151.13	92.95	360.34	129.85	94.45	204.27	125.73	328.11	165.55	143.22	159.47	143.03	173.24				97	125		75	78	101	40
								165.35	303.34	207.3	154.8	195.77	92.14	91.91	163.07	103.38	85.5	181.33	129.85	121.84	197.68				109	101		27	61	85	59
								183.39	38.85	257.01	227.55	232.18	191.24	192.28	122.54	153.28	99.09	56.39	66.26	135.97	167.41				108	100		32	54	47	38
								143.98	124.26	87.19	93.57	128.03	206.33	108.23	168.29	41.57	68.82	124.06	199.01	63.22	173.58				51			24	85	61	72
								118.9	124.06	163.07	136.13	137.12	104.99	92.32	215.65	207.27	318.95	250.92	98.54	150.31	129.76				91			42	74	52	28
								240.83	116.65	295.47	79.5	80.41	95.87	137.24	164.72	112.9	123.99	123.66	319.25	164.97	144.08				66			54	64	66	59
								122.68	182.01	148.99	112.61	87.91	138.14	115.7	90.69	172.98	288.15	205.51	234.49	116.63	134.93				34			24		66
								87.29	160.95	78.52	164.47	138.41	248.32	164.55	121.9	122.99	117.5	105.73	254.66	103.22	217.86				121			40		76
								155.16	217.6	136.58	147.48	134.57	189.04	362.66	171.61	326.53	273.88	125.98	134.75	136.67	348.83				89			95		63
								110.67	185.89	175.77	257.91	113.94	242.39	106.56	162.47	108.49	223.86	123.79	108.27	157.96	247.96				103			46
								112.71	195.48	133.67	52.8	135.28	138.66	352.18	133.67	161.16	101.68	138.01	155.16	152.44	340.41				49			29
								322.2	86.65	200.67	143.76	173.45	264.94	137.21	190.8	237.94	95.99	438.92	296.35	239.55	113.97				78			11
								249.99	117.85	190.7	276.11	95.6	168.24	110.53	160.97	120.17	141.95	36.72	91.01	91.24	74.19							65
								300.96	102.98	74.67	113.97	120.97	107.15	207.33	117.51	89.6	126.9	85.5	211.87	270.82	183.93							65
								112.9	155.94	85.14	88.19	123.56	85.52	217.95	142.31	108.31	65.83	201.72	372.43	361.6	172.16							72
								253.39	158.24	251.22	152.75	352	131.05	182.07	163.05	73.47	122.2	197.32	237.8	118.31	146.07			Animal Means	84.25	107.013	80.6806	55.3563	56.8077	69.8765	65.9615	61.4444	43.1014
								238.05	157.54	147.83	191.38	109.15	149.82	113.68	218.92	66.16	337.62	94.25	250.75	169.04	295.13			Mean	90.648			60.6802			56.8358
								206.95	298.95	116.6	178.63	48.61	104.89	167.21	159.69	381.1	201.85	217.82	185.9	175.79	133.01			SEM	8.24731			4.61723			6.98989
								139.18	315.51	352.85	203.8	142.62	161.98	211.06	103.42	54.5	95.6	93.63	169.62	128.71	147.59
								127.76	171.66	217.84	110.9	181.62	133.94	105.47	252.88	240.29	111.97	93.98	181.46	76.24	126.31
								54.24	378.54	172.98	178.55	75.92	144.6	131.14	85.14	132.58	118.55		136.12	79.5	160.35
								70.68	163.61	134.7	105.07	172.06	232.26	101.96	257.51	154.97	155.48		98.54	115.13	145.46
								335.52	131.59	244.66	253.23	81.93	496.85	119.23	170.5	127.22	195.75		94.34	304.03	199.47
								33.64	89.31	116.27	137.05	88.07	234.62	153.16	115.22	103.41	145.74		323.39	291.69	192.07
								40.22	235.7	99.17	142.78	69.42	259.57	130.92	42.36	189.33	309.14		204.65	152.57	182.49
								147.55	111.69		246.41	72.38	193.44	80.4	146.49	291.48	145.74		81.83	288.94	116.08
								172.43	182.78		197.06	102.01	120.77	195.09	76.66	98.93	18.47		115.15	209.8	157.54
								131.68	86.96		114.33	242.8	88.07	132.11	68.03	120.52	145.74		122.65	125.94	172.48
								100.95	77.85			181.06	83.43	103.54	171.89	60.95	127.07		169.64	150.55	132.43
								100.06	130.33			204.29	136.39	146.59	406.54	103.06	135.7		190.64	101.06	145.31
									71.61				130.5	147.83	202.78		230.75		314.09	140.76	342.99
									223.6				212.76	175.92	259.02		113.97				127.18
													161.18	164.9			113.97				331.87
							Animal Means	178.121	164.353	162.419	165.247	145.866	164.929	171.559	173.744	154.413	145.508	173.981	160.883	170.595	184.117
							Mean	168.298			161.9				161.911				171.865
							SEM	4.94332			5.55833				7.13544				6.73705
[truncated: 2 more columns]
