# Supplementary material for: Regulation of hippocampal mossy fiber-CA3 synapse function by a Bcl11b/C1ql2/Nrxn3(25b+) pathway
Source: eLife. 2024 Feb 15;12:RP89854. doi: 10.7554/eLife.89854 (PMC10942602; doi:10.7554/eLife.89854)
Supplement: Figure 3—source data 1. [file elife-89854-fig3-data1.xlsx]

## Sheet: Figure 3
Figure 3b																																								Figure 3e
	fEPSP slope (% of baseline)																																								fEPSP slope (% of baseline)
	Control+EGFP									Bcl11b cKO+EGFP										Bcl11b cKO+EGFP-2A-C1ql2								Bcl11b cKO+EGFP-2A-C1ql3													Control
Time (min)	slice #1	slice #2	slice #3	slice #4	slice #5	slice #6	slice #7	Mean	SEM	slice #1	slice #2	slice #3	slice #4	slice #5	slice #6	slice #7	slice #8	Mean	SEM	slice #1	slice #2	slice #3	slice #4	slice #5	slice #6	Mean	SEM	slice #1	slice #2	slice #3	slice #4	slice #5	slice #6	slice #7	slice #8	Mean	SEM			Time (min)	slice #1	slice #2	slice #3	slice #4	slice #5	slice #6	slice #7	slice #8	Mean
-10	1.11044	0.749494	1.07816	0.695984	1.21173	1.3267	1.38574	1.07975	0.101104	1.02515	0.906452	1.00516	1.19783	0.789061	0.892117	0.992659	1.41403	1.02781	0.0694326	0.934829	0.982368	1.05372	1.04369	1.06521	1.38804	1.07798	0.0652423	1.08128	0.960032	1.16718	0.736951	0.710303	1.0178	1.06016	0.952972	0.960836	0.0571887			-12	1.15581	0.965072	0.952173	1.06312	1.01892	0.90638	0.825921	0.896892	0.973036
-9.66667	0.991598	0.900282	0.860902	1.08685	0.814548	0.883645	1.14596	0.954827	0.0467662	0.903853	1.15015	1.07849	0.853615	1.06426	1.1252	0.981448	0.9064	1.00793	0.0395925	0.989263	0.870822	1.01156	0.955741	1.04182	1.16945	1.00644	0.0404587	0.945948	0.940151	1.07864	1.02633	1.17205	0.959519	1.19856	0.962807	1.0355	0.0366808			-11.3333	0.987697	0.939152	1.11261	0.884586	0.953716	0.928536	0.936971	1.04696	0.973779
-9.33333	0.88762	0.873824	1.05966	0.976528	1.02256	1.07065	0.828571	0.959916	0.0366127	0.99868	1.03648	1.12686	0.872884	0.836895	1.1088	0.853467	0.716817	0.94386	0.0514915	0.996745	0.894443	1.10055	0.941787	0.973354	1.23455	1.02357	0.0506754	1.105	0.846766	0.909673	1.13001	0.686537	0.954697	0.950553	0.988337	0.946447	0.0499136			-10.6667	0.868588	1.06115	1.10787	0.867183	0.965252	1.12702	0.865484	0.93553	0.97476
-9	0.916197	0.852751	0.950101	0.922262	1.30014	0.928351	1.11433	0.997733	0.0588566	1.39134	1.11393	1.11485	0.960247	0.752015	0.911864	1.0092	0.814838	1.00853	0.0712075	0.935109	0.72111	1.0163	1.05155	0.946635	0.909137	0.929974	0.0471154	0.949784	1.13028	0.86486	1.07534	0.994246	0.977548	1.06796	1.09255	1.01907	0.0311233			-10	0.95765	0.92351	1.17189	1.03192	0.944608	0.944784	0.976808	0.965692	0.989608
-8.66667	0.745701	0.914682	1.01043	0.980367	0.852415	0.932536	0.881469	0.902515	0.033202	0.937227	1.02163	0.905767	1.02142	0.692171	0.99561	1.25162	0.845743	0.958898	0.0570271	1.0336	0.928235	1.05766	1.00556	0.946265	1.16993	1.02354	0.0356241	1.04849	0.896329	0.903039	0.824945	1.21851	1.07985	1.14589	0.984571	1.0127	0.0477153			-9.33333	0.657027	0.946078	0.986554	1.24076	0.991845	1.00627	1.22237	1.01804	1.00862
-8.33334	1.25709	1.01677	1.1781	0.88617	0.776515	0.843125	1.07233	1.0043	0.0673849	0.966688	1.18376	1.02981	1.04424	0.703265	1.28352	1.06192	1.04893	1.04027	0.0596739	1.01508	0.814174	0.92606	0.960064	0.92127	1.01101	0.941276	0.0302486	0.757944	0.951072	1.06266	0.850663	0.875237	0.972726	1.23074	1.0802	0.972656	0.052985			-8.66667	0.976449	1.19433	1.01224	0.968604	0.980916	0.998698	1.14052	0.927054	1.02485
-8	1.26424	0.835307	1.0517	1.16671	1.1737	0.659167	0.989394	1.02003	0.0803345	1.03551	1.02233	1.19193	1.14938	1.20461	0.937428	1.08634	0.79408	1.0527	0.0489769	0.929591	1.1475	1.10377	1.04801	0.999458	0.898686	1.02117	0.0397336	1.24417	0.746101	1.26019	1.11028	0.660091	0.977338	0.973808	0.892705	0.983086	0.0767543			-8	1.13084	1.12662	0.993074	0.975205	1.00472	0.946076	0.841746	1.05456	1.00911
-7.66667	0.809903	0.868673	1.04855	1.00827	1.20055	1.10128	1.12789	1.02359	0.0531728	0.916052	1.11433	1.11345	1.01506	1.31453	0.987852	1.0334	0.883567	1.04728	0.0480102	0.990853	1.2959	0.868405	1.14353	1.03012	0.845156	1.02899	0.0696174	0.823518	1.1244	0.996457	0.819283	0.919374	0.841073	0.926934	0.995452	0.930812	0.0373483			-7.33333	1.05488	0.950547	1.0484	0.965603	1.05074	1.108	0.902865	1.01206	1.01164
-7.33334	0.916873	0.969706	1.11351	0.833952	1.18604	1.07236	0.791621	0.983437	0.0555563	1.01111	0.973069	1.12562	1.23468	1.13113	1.06243	1.05204	1.03579	1.07823	0.0292227	1.12273	1.02217	0.850142	0.949452	1.16248	1.08967	1.03278	0.0478064	0.862933	0.989294	0.85606	1.33997	1.08663	0.934991	0.882549	1.14779	1.01253	0.0599573			-6.66667	1.11682	0.964178	1.0075	1.00791	0.987231	1.04652	1.03547	1.00956	1.0219
-7	0.871208	0.954369	1.03412	0.945555	1.18337	0.951369	1.09041	1.00434	0.0398896	0.973362	0.969859	0.959598	1.12936	1.19738	0.80555	1.1889	1.3137	1.06722	0.0589654	1.04632	0.928454	0.972524	1.07828	0.956608	1.11991	1.01701	0.0309139	0.914904	0.949112	0.806237	1.27478	1.0718	1.18257	1.07248	1.0417	1.0392	0.0527915			-6	1.04856	0.961943	0.935971	0.894788	0.997188	0.970079	0.925784	1.01966	0.969247
-6.66667	0.829598	0.949335	1.05244	1.02286	1.07661	0.890684	0.973976	0.970786	0.0335938	1.01295	0.889095	1.24202	0.944533	1.23392	1.07706	1.08379	1.14972	1.07914	0.0451407	0.925756	1.04186	1.16733	0.998683	0.932105	1.32039	1.06435	0.0626299	1.07779	0.787683	1.21755	1.14392	1.25907	1.04086	1.31572	1.00194	1.10557	0.0595343			-5.33333	0.860422	0.854465	0.889538	1.02262	1.06337	0.919858	0.956344	0.991367	0.944747
-6.33334	0.849968	1.10961	0.951212	1.07764	0.989702	0.948516	0.710014	0.948093	0.0513901	1.10317	0.980092	0.962251	0.796184	1.15728	1.04251	1.00975	1.04178	1.01163	0.038105	1.12909	0.898927	0.864377	0.965764	1.01399	0.853612	0.954293	0.0430255	1.35509	0.865947	0.969921	1.17935	0.763375	1.24987	0.885942	1.06262	1.04151	0.0730336			-4.66667	0.89617	1.08707	1.05018	0.913092	0.979095	0.989097	1.18472	1.0482	1.01845
-6	0.894958	1.05657	0.881259	1.12422	1.03858	0.967159	1.00534	0.995442	0.0331716	1.0385	1.01932	1.03168	1.02329	1.15169	0.946596	0.97046	0.985047	1.02082	0.0219129	0.967845	1.14531	0.851664	0.94218	0.893319	0.840848	0.940195	0.0457334	1.05826	0.890729	0.959903	1.07113	1.112	0.980273	0.826109	0.858805	0.969652	0.0372595			-4	1.0199	0.892898	1.00453	1.00611	0.93028	0.970633	1.01692	1.09419	0.991934
-5.66667	0.651475	0.849473	1.15274	0.975248	1.12365	1.25461	0.920545	0.989677	0.0777285	1.15036	0.984506	1.14762	1.02928	0.774304	0.898112	0.923729	0.991966	0.987484	0.0446102	0.930433	0.971651	0.961781	1.0202	0.932352	1.08289	0.983218	0.0239928	0.985013	1.19609	0.927951	0.932187	1.13649	0.737511	0.905678	1.04714	0.983506	0.0508736			-3.33333	1.05026	1.01803	0.908902	1.01001	1.02633	1.07643	1.09113	0.989872	1.02137
-5.33334	1.10957	0.991013	1.32614	0.976783	0.920141	0.508881	0.866318	0.956979	0.0940475	0.989704	1.0126	0.914193	0.915162	0.767994	0.984326	0.905969	1.10013	0.94876	0.0345279	1.0537	0.858027	0.872613	0.984828	1.08688	0.960354	0.969401	0.0378597	0.900952	1.24943	1.10734	1.17595	0.838605	1.0635	0.908443	0.853573	1.01222	0.0556157			-2.66667	1.02268	1.07344	1.02429	1.03672	0.95918	0.957893	1.01746	1.01069	1.01279
-5.00001	1.15225	1.05353	1.17125	1.10989	0.818218	1.17433	1.00162	1.06873	0.0482603	1.1255	1.08142	0.983939	0.970162	0.945286	0.869197	1.01131	1.03809	1.00311	0.0283891	0.968499	1.36261	1.01048	1.00831	1.00586	0.849703	1.03424	0.0702953	0.72411	0.990414	0.966807	1.12823	1.19974	1.18886	0.910077	1.1886	1.03711	0.0600536			-2	1.00696	1.02853	0.959089	1.14834	0.994031	1.04098	0.965621	1.01467	1.01978
-4.66667	1.23634	1.03702	1.02394	1.25323	1.25877	1.00464	0.939951	1.1077	0.0514833	0.950576	1.03326	0.946335	1.04742	1.01063	0.87096	1.13218	1.4025	1.04923	0.0575587	1.0148	1.16073	0.955156	1.01804	1.07617	1.22745	1.07539	0.0415618	0.86956	1.06924	1.14308	0.840958	0.857904	0.985514	0.937983	1.09464	0.97486	0.0413443			-1.33333	0.951333	0.946972	0.898825	0.989608	0.978609	0.955308	1.04447	0.970428	0.966945
-4.33334	0.990053	1.14754	0.936592	1.22661	0.884443	1.01491	0.943938	1.02058	0.0465455	1.04425	0.806527	0.942747	1.06669	1.21774	0.886652	1.01863	1.38912	1.04655	0.065711	0.962794	0.985102	0.881834	0.979718	0.99441	0.849783	0.942273	0.0248884	1.18592	0.980754	0.939053	0.823974	0.88435	0.942748	0.912717	0.972852	0.955296	0.0374781			-0.666667	1.03192	0.939375	1.0158	1.08863	1.09919	1.07606	1.10014	0.978405	1.04119
-4.00001	0.954814	1.08034	0.891437	0.925845	0.727972	1.00958	1.0197	0.944241	0.0432314	0.946203	1.00889	0.931512	1.13666	0.903762	1.13525	0.92273	0.860734	0.980716	0.0369079	1.01854	1.01507	1.01272	0.997307	1.07063	0.856325	0.995098	0.0295671	0.96862	1.04054	0.840625	0.933643	1.08734	1.06119	0.936474	1.05028	0.98984	0.0297438			0	1.20604	1.12662	0.920559	0.885186	1.07478	1.03138	0.94925	1.01617	1.02625
-3.66667	0.822453	0.984808	0.827221	1.25579	1.00405	0.800132	1.05851	0.964709	0.0620491	0.949195	0.794086	0.788431	1.39557	1.19046	0.76782	0.869673	0.908015	0.957906	0.0787934	1.05707	0.868963	1.39142	0.935596	1.06065	0.967693	1.0469	0.0751242	0.770152	0.991954	0.915766	0.976993	1.21457	0.966437	1.18059	0.940835	0.994662	0.0506338			0.66666	0.965971	0.995237	0.960275	0.974605	1.09227	1.10579	1.10723	1.15589	1.04466
-3.33334	0.749563	1.04089	0.80927	0.947603	1.12782	1.26678	0.960419	0.986049	0.0674763	0.834113	0.979289	0.967244	0.867272	0.73451	0.860558	0.863013	0.825908	0.866488	0.0277221	1.17875	0.769993	0.910841	0.971562	1.0444	0.844358	0.953318	0.0596475	1.42939	1.36269	1.08107	0.885602	0.984061	0.935201	1.21603	0.977874	1.10899	0.0722298			1.33332	1.24055	0.92284	1.00789	1.12344	1.01249	1.07717	1.23902	1.00732	1.07884
-3.00001	1.27302	1.02812	0.913645	1.05613	0.884276	0.982188	1.02342	1.02297	0.0479344	0.873011	0.963638	0.952421	0.800673	0.998921	1.10651	1.05038	1.3792	1.01559	0.0619874	1.0378	1.12257	1.03537	0.973232	0.951191	1.0576	1.02963	0.0250683	1.10465	1.20281	1.1554	0.989448	1.00515	1.02912	0.920259	0.941672	1.04356	0.0358062			1.99998	1.21636	1.06294	1.21457	1.29117	1.14594	1.00867	1.34188	1.13732	1.17736
-2.66667	1.09847	0.996983	0.932521	1.03975	0.646901	1.59684	0.878014	1.02707	0.109814	0.878075	0.970862	0.874561	0.765691	0.907527	1.23645	0.982336	0.732962	0.918557	0.0549947	0.97832	1.04547	1.0095	1.00291	1.08282	0.989313	1.01805	0.0159722	1.1357	1.00778	0.992802	0.997212	0.821093	0.971049	1.07726	1.02663	1.00369	0.0321682			2.66664	1.1837	0.98764	1.16991	1.4184	1.02475	0.93943	1.19427	1.07363	1.12397
-2.33334	1.01216	1.0417	1.05207	1.09069	0.820554	1.18327	0.789495	0.998563	0.0540963	0.887741	1.10931	0.953513	0.813956	0.779901	0.925439	1.01342	1.00165	0.935617	0.0383472	0.990479	0.982586	0.811287	1.01274	0.970522	1.00088	0.961415	0.030608	1.02757	1.11334	0.973035	0.880103	0.767485	0.998302	0.810522	0.926396	0.937094	0.0406283			3.3333	1.04178	1.10249	1.17881	0.971304	1.08935	1.0611	1.13888	1.11949	1.0879
-2.00001	1.07221	1.11569	0.987114	0.765352	1.29263	0.835896	0.983811	1.00753	0.0665932	0.965076	1.00748	1.07007	0.957628	1.05663	0.872018	1.06015	0.802383	0.973929	0.0340165	1.00105	0.994288	0.920331	1.009	1.03196	0.983648	0.990047	0.0154453	0.933739	0.930631	0.836022	0.732421	0.800722	0.963502	0.975442	0.899402	0.883985	0.0304082			3.99996	1.21359	1.34516	1.35822	1.73256	1.21552	1.23079	1.33424	1.30371	1.34172
-1.66668	0.981364	1.11242	0.880889	0.740779	0.959509	0.833613	1.07871	0.94104	0.0501316	1.03413	0.833514	1.11594	0.91273	1.29234	1.09117	0.853245	0.955526	1.01107	0.0544859	0.909108	0.94792	1.11532	1.00055	0.975201	0.781653	0.954959	0.0448666	0.870607	0.954292	0.977774	0.986375	1.31911	1.01612	0.823972	1.06848	1.00209	0.0529898			4.66662	1.48078	1.49643	1.55264	1.76887	1.2137	1.21048	1.61091	1.33886	1.45908
-1.33334	1.32795	1.11089	1.01691	0.903064	0.989869	1.04706	1.38441	1.11145	0.0677304	0.953798	0.893109	0.740997	0.99523	0.968083	1.14829	0.984556	0.896022	0.947511	0.0406826	1.04173	0.872025	1.01586	0.888821	0.879774	0.850581	0.924798	0.0334564	1.00489	0.852927	1.15689	0.909542	1.02051	0.983837	0.901152	0.984152	0.976739	0.0329577			5.33328	1.70266	1.77373	1.65539	1.65305	1.35541	1.58307	2.01255	1.53753	1.65917
-1.00001	1.40577	1.16475	1.05133	0.818338	1.05076	0.966588	0.95909	1.05952	0.0703725	0.944362	0.881471	1.15183	1.01225	0.900301	0.931434	0.887655	0.713588	0.927862	0.0439175	0.943714	0.90363	1.01577	1.00841	0.979511	0.994179	0.974202	0.0175453	1.10465	1.11348	0.923754	1.13891	0.939209	0.989707	1.19466	1.01282	1.05215	0.0351128			5.99994	1.43101	2.03829	1.80555	1.84089	1.7027	2.09636	2.40628	1.60159	1.86533
-0.666676	0.870822	1.08643	0.911794	1.03361	0.565163	1.26887	1.09944	0.97659	0.0845852	0.97014	1.12878	0.780005	1.1462	1.11026	1.26695	0.971792	0.853815	1.02849	0.057684	0.966067	1.42877	1.09732	1.02856	0.909942	0.98317	1.06897	0.0764054	0.943855	0.91705	1.12386	1.23758	1.34055	0.86602	0.84069	0.98185	1.03143	0.0645796			6.6666	1.43809	2.25101	2.07526	2.07344	1.97665	2.06737	2.58445	1.87704	2.04291
-0.333343	0.946319	1.10703	0.844987	1.15392	1.0988	0.676288	0.975571	0.971844	0.0639296	1.19018	1.13078	0.851156	0.924703	1.21316	0.972337	0.974234	1.19792	1.05681	0.0502346	0.930339	1.01933	1.13833	1.07592	1.06509	0.870046	1.01651	0.0406669	0.815496	0.948692	0.886387	0.847914	1.25389	1.13226	1.01064	0.970341	0.983202	0.0523381			7.33326	1.57785	2.41301	2.33173	2.69397	2.01356	2.16154	2.75143	2.02025	2.24542
0	4.60319	5.20525	4.84951	7.22477	4.65725	4.67828	4.94165	5.1657	0.352001	3.66536	3.95689	3.83418	4.02488	3.98622	5.69439	3.59358	7.53627	4.53647	0.488823	2.89156	4.04452	4.12403	3.28859	3.02189	4.75909	3.68828	0.300111	6.17691	3.57454	3.60999	3.63121	5.837	4.43052	3.81792	5.29073	4.5461	0.37988			7.99992	1.53317	2.48161	2.27067	2.88061	2.44877	2.23022	3.22756	2.0898	2.3953
0.333333	2.62308	2.87997	3.76654	4.61796	3.17379	2.69127	4.19974	3.42176	0.296068	3.12355	2.93095	3.55004	3.16397	3.12734	4.45406	2.99729	5.40565	3.59411	0.311776	2.22629	3.0686	3.35751	2.41185	2.21871	3.89183	2.86246	0.281031	5.12039	2.60274	2.82014	2.82568	3.90033	3.79699	2.73702	3.78489	3.44852	0.305843			8.66658	2.3677	2.86952	2.32047	2.94482	2.72587	2.80075	3.54297	2.11373	2.71073
0.666666	2.3852	2.07568	2.67154	3.20066	2.8857	1.94687	2.68322	2.54984	0.167933	2.53986	2.64602	2.8944	2.98008	2.22002	3.51857	2.80005	4.59981	3.02485	0.261189	2.03913	2.70017	2.42939	2.23026	1.83872	2.88154	2.3532	0.161635	3.55428	2.05629	2.27791	2.43407	3.92463	3.02153	2.69013	3.77401	2.96661	0.25288			9.33324	2.75893	2.80472	2.3833	2.8425	2.7623	2.84414	3.24393	2.37372	2.75169
0.999999	2.11054	1.97231	2.16354	2.9219	2.13888	2.00851	2.67551	2.28446	0.137919	2.07331	2.25625	2.77659	2.62875	2.39731	3.29978	2.26481	3.49022	2.64838	0.181485	1.85769	2.55724	2.5344	2.08748	1.90361	2.85402	2.29907	0.165929	3.64706	1.77922	2.03637	2.3003	3.311	2.68317	2.05496	2.92881	2.59261	0.235079			9.9999	3.38375	2.69612	2.55342	3.21698	3.02678	3.01086	3.70396	2.61066	3.02532
1.33333	2.20515	1.87233	2.34065	2.52413	1.82677	1.76938	2.31426	2.12181	0.11204	2.11382	2.2404	2.57656	2.28884	2.10328	2.78196	2.14394	3.77159	2.50255	0.200336	1.85189	1.97469	2.32849	1.78157	1.56968	2.44787	1.99236	0.137066	3.02236	1.68751	1.72309	2.56105	2.95754	2.69512	1.92222	3.15188	2.4651	0.212836			10.6666	3.3272	3.11509	2.64372	4.01965	3.17553	3.15931	3.92033	2.80559	3.2708
1.66667	2.36879	1.65516	1.75234	2.67387	2.30619	1.81865	2.06996	2.09214	0.141628	2.12257	2.10656	2.59435	2.35114	2.06929	2.47554	2.17968	3.35576	2.40686	0.151183	1.76855	2.24196	2.2993	1.69215	1.64947	2.17966	1.97185	0.122047	2.66309	1.65475	2.01864	2.04069	2.6627	2.4423	1.83222	2.58479	2.2374	0.141103			11.3332	3.61303	3.28625	2.86897	4.15257	3.16812	3.10835	4.0543	2.8041	3.38196
2	2.12898	1.59452	1.47882	2.00502	2.09851	2.0789	1.85651	1.89161	0.0984376	1.9511	1.88313	2.51196	1.9783	1.84386	2.2518	2.12939	3.49921	2.25609	0.193931	1.81896	1.8042	2.04926	1.72851	1.59911	2.01397	1.83567	0.069791	2.44544	1.84866	1.95568	1.94299	2.35231	1.89472	1.88979	2.26169	2.07391	0.0843745			11.9999	3.77683	3.42278	2.54493	4.43823	3.50024	3.48003	3.93752	3.02819	3.51609
2.33333	2.14935	1.66359	1.69793	2.22285	1.704	1.68834	1.6497	1.82511	0.0938249	1.92279	1.843	2.61557	2.05912	2.04883	2.28548	2.03516	2.80131	2.20141	0.120692	1.69756	2.4528	2.04926	1.80496	1.54259	2.21859	1.96096	0.139622	2.24628	1.44418	1.71022	2.02969	2.57943	1.94839	2.05371	2.83339	2.10566	0.158167			12.6665	3.42011	3.65695	2.96361	4.51175	3.63114	3.59524	4.4633	2.99641	3.65481
2.66666	1.66064	1.55366	1.84913	2.20007	1.60925	1.80458	2.00829	1.81223	0.0874667	1.93775	1.91775	1.99175	1.74726	1.62769	2.29376	1.99708	2.76925	2.03529	0.125448	1.69279	1.89464	2.19295	1.78393	1.47967	2.01317	1.84286	0.102004	1.74331	1.523	1.85238	1.60379	2.29138	1.98319	1.83901	2.28994	1.89075	0.101054			13.3332	4.13754	4.03323	2.87588	4.20328	3.61487	3.6329	4.71596	3.26725	3.81012
3	1.687	1.7713	1.52305	1.96662	1.69749	1.60045	1.90702	1.73613	0.0600164	1.85696	1.65469	1.97443	2.29183	1.96975	2.19344	2.11197	2.58589	2.07987	0.100767	1.70822	2.42393	1.96457	1.75013	1.56094	1.98604	1.89897	0.123865	1.76249	1.5405	1.44568	1.88136	2.68307	2.17123	1.82807	2.20477	1.93965	0.141872			13.9999	4.2941	3.94497	3.01103	4.19698	3.50898	3.67685	4.75989	3.20057	3.82417
3.33333	1.23614	1.4984	1.66296	2.26278	1.46762	1.74636	2.23318	1.72963	0.147049	1.86594	1.75712	1.99081	1.82097	1.81821	2.10952	1.95857	2.40507	1.96578	0.0744711	1.67175	1.56908	1.88023	1.73893	1.50467	2.17488	1.75659	0.0993961	2.28709	1.7417	2.08511	1.89203		1.93287	1.93957	2.32677	2.02931	0.075961			14.6665	4.34309	4.20239	3.04937	4.71219	3.57164	4.03283	4.97462	3.22786	4.01425
3.66666	1.22485	1.46387	1.58338	1.8307	1.95472	1.57591	1.8395	1.63899	0.0958537	1.84499	1.64446	2.108	1.91039	1.87439	2.34242	1.81027	2.7222	2.03214	0.12338	1.5539	2.04325	2.27809	1.50554	1.75216	1.83215	1.82752	0.120248	1.95398	1.3998	1.8578	2.08355	2.28494	1.73309	1.99199	2.10955	1.92684	0.0955477			15.3332	4.37237	4.30919	2.88122	4.65128	3.85299	4.08397	4.69741	3.31125	4.01996
4	1.62434	1.58749	1.59966	1.89137	1.44443	1.90902	1.64172	1.67115	0.0639272	1.97757	1.6885	2.28728	1.77364	1.86777	2.07338	1.86577	2.68345	2.02717	0.114439	1.82289	1.97064	1.8361	1.78039	1.59381	1.94655	1.82507	0.0552422	2.37812	1.79252	1.80662	1.95302	2.10446	1.81107	1.9446	2.05787	1.98104	0.0701753			15.9998	4.59549	4.1492	3.22048	4.04725	3.88335	3.98187	5.09468	3.42629	4.04983
4.33333	1.16412	1.6527	1.56321	1.85041	1.56454	1.94098	1.93227	1.66689	0.103904	1.96376	1.59269	1.82417	1.46216	1.60672	2.0323	1.80939	2.55245	1.85545	0.120823	1.70027	1.56437	2.07594	1.80987	1.56906	1.79897	1.75308	0.0778519	1.48066	1.42556	1.83099	1.64293	1.69597	1.78571	1.98319	2.12943	1.74681	0.0843346			16.6665	4.84342	4.29221	3.17404	5.50826	3.97758	4.21377	5.51569	3.22126	4.34328
4.66666	1.7176	1.69063	1.27303	1.85502	1.22858	1.86564	2.0806	1.67302	0.11914	1.75868	1.60001	1.74257	1.62885	1.84976	2.21584	1.72347	2.50932	1.87856	0.112544	1.6132	1.66794	1.97486	1.65127	1.41884	1.92158	1.70795	0.0845093	2.06316	1.63025	1.71049	1.8723	2.2501	1.82659	1.5641	2.13697	1.88174	0.087662			17.3332	4.53817	4.15993	3.34911	5.2394	3.90108	4.2843	5.14025	3.30314	4.23942
5	1.29436	1.61079	1.47438	1.86756	1.4386	1.40394	1.73024	1.5457	0.0758623	1.8031	1.64255	1.63319	1.3415	1.69893	2.1432	1.69017	2.19704	1.76871	0.0993476	1.62554	1.74339	1.89527	1.69893	1.51575	1.66853	1.69124	0.0516517	1.77679	1.52874	1.88393	1.79709	2.05264	1.86118	1.70916	2.06728	1.8346	0.0625152			17.9998	3.8816	4.44125	3.44988	5.50226	3.82834	3.97891	5.83138	3.37145	4.28563
5.33333	1.28103	1.71381	1.3948	1.83736	1.64094	1.86374	1.75204	1.64053	0.0839484	1.81737	1.68609	2.12844	1.67692	1.93861	1.9318	1.70449	2.31905	1.90035	0.0813781	1.7664	1.67997	1.69634	1.68753	1.50972	1.66646	1.66774	0.0346731	2.06455	1.37782	1.77223	1.81747	2.29495	1.74755	1.69584	1.97102	1.84268	0.0965991			18.6665	4.9559	4.50248	3.4643	4.97775	3.90778	4.24017	5.40027	3.41806	4.35834
5.66666	1.30054	1.55413	1.56302	1.71603	1.81142	1.52816	2.10957	1.6547	0.097002	1.77479	1.59148	1.65472	1.47844	1.77994	1.9385	1.74434	1.99039	1.74408	0.0601389	1.68475	1.79982	2.00593	1.84574	1.4958	1.60726	1.73988	0.0743374	2.10885	1.56767	1.68504	1.57095	1.70115	1.92302	1.93065	1.79022	1.78469	0.0675118			19.3331	4.84973	4.74	3.45975	4.92734	4.05493	3.8962	5.46712	3.57859	4.37171
5.99999	1.82622	1.56818	1.76474	2.15118	1.5914	1.9503	1.63348	1.78364	0.0803203	1.89632	1.79294	1.64754	1.47376	1.6571	1.83572	1.61913	1.97332	1.73698	0.0585048	1.57186	1.79534	1.90055	1.7176	1.59997	1.5499	1.6892	0.0571188	1.8319	1.64425	1.40398	1.74371	2.54226	1.64441	1.66982	2.03652	1.81461	0.121862			19.9998	4.46436	4.57018	3.97447	5.6928	4.1913	4.25901	4.98145	3.51179	4.45567
6.33333	1.06787	1.54301	1.47123	1.99708	1.54369	2.01346	2.08565	1.67457	0.140722	1.77848	1.68228	1.76379	1.49827	1.60977	2.15325	1.59649	1.83125	1.7392	0.0707687	1.6233	1.70807	1.83323	1.68036	1.63149	1.64596	1.68707	0.0319869	2.22081	1.67631	1.56252	1.49687	2.27118	1.8421	1.79929	1.6745	1.81795	0.101562			20.6665	4.44448	4.76637	3.73974	5.14008	3.98244	4.36997	5.24175	3.25541	4.36753
6.66666	1.74328	1.60997	1.60392	1.71961	1.4029	1.88352	1.86847	1.69024	0.0634825	1.78814	1.45684	1.70637	1.69488	1.92121	1.91453	1.60393	1.95741	1.75541	0.0616496	1.59814	1.88151	1.89662	1.57394	1.40124	1.49446	1.64098	0.0833629	2.17442	1.38454	1.80852	1.85871	2.30263	1.53016	1.80821	1.70694	1.82177	0.107464			21.3331	5.27363	4.52303	3.61407	5.2457	4.05906	4.32898	5.42865	3.50581	4.49737
6.99999	1.3936	1.51069	1.48086	1.87319	1.24776	1.79392	1.82939	1.58992	0.0916765	1.88297	1.59319	1.56219	1.28351	1.75145	2.13103	1.67952	2.24178	1.76571	0.110614	1.70533	1.93991	1.72472	1.60322	1.37981	1.78038	1.6889	0.0765518	1.82737	1.48478	1.31692	1.80453	2.15682	1.53288	1.63349	1.75946	1.68953	0.0910174			21.9998	4.89041	4.8372	3.44671	6.1612	4.1681	4.24959	5.47149	3.25965	4.56054
7.33333	1.56371	1.51596	1.40794	1.72985	1.37087	1.56412	2.22441	1.62527	0.109254	1.75569	1.59831	1.50446	1.7858	1.40999	1.91594	1.51879	1.98831	1.68466	0.0736611	1.76949	1.86959	1.71344	1.61658	1.51772	1.59378	1.6801	0.0525556	1.90445	1.46392	1.44337	1.96046	1.68364	1.60479	1.39	1.7354	1.64825	0.0751773			22.6664	4.93124	4.80905	3.8083	5.87314	4.02822	4.58821	5.43083	3.29517	4.59552
7.66666	1.48156	1.61641	1.34373	1.68301	1.66813	1.69234	1.69888	1.59772	0.0511238	1.59711	1.46387	1.60682	1.55795	1.54779	1.88385	1.39958	1.88707	1.618	0.0631937	1.51443	1.61468	1.71676	1.62828	1.41601	1.77926	1.61157	0.0538989	1.27347	1.34001	1.70088	1.57775	1.36879	1.89199	1.57843	1.55815	1.53618	0.0723637			23.3331	5.51123	4.56147	3.33409	5.73391	4.16118	4.21765	5.11105	3.35711	4.49846
7.99999	1.5222	1.48576	1.52934	1.63924	1.65228	1.74123	1.87219	1.63461	0.0521036	1.64199	1.63753	1.54628	1.5673	1.92568	1.90571	1.42011	1.75537	1.675	0.0624154	1.62433	1.75171	1.55292	1.54298	1.3611	1.7574	1.59841	0.0608029	1.89224	1.38328	1.52731	1.67658	1.90147	1.6203	1.793	1.73623	1.6913	0.063237			23.9998	4.66067	5.01976	3.25723	6.29503	4.21753	4.66133	5.56289	3.3373	4.62647
8.33332	1.83404	1.49606	1.39628	1.74905	1.52334	1.87154	1.50908	1.62563	0.0711425	1.58721	1.45514	1.58576	1.46329	1.42434	1.91858	1.5118	2.1922	1.64229	0.0960433	1.5553	1.56951	1.69599	1.68655	1.54161	1.52757	1.59609	0.0306572	1.25847	1.41856	1.70467	1.4443	2.68396	1.64504	1.91041	1.46127	1.69084	0.158754			24.6664	4.92431	5.01998	3.55894	5.80982	4.03101	3.97854	5.28431	3.47901	4.51074
8.66666	1.59886	1.52708	1.261	1.98275	1.54586	1.65087	1.75709	1.61764	0.0837726	1.63439	1.61085	1.35982	1.52764	1.35076	1.77842	1.55054	1.86446	1.58461	0.0639013	1.67006	1.59226	1.81237	1.43676	1.32526	1.55166	1.56473	0.070017	1.65645	1.44838	1.47505	1.44381	1.83535	1.52827	1.66378	1.66195	1.58913	0.048858			25.3331	4.65404	4.92077	3.38309	5.66579	4.08031	4.0476	5.54434	3.54332	4.47991
8.99999	1.41127	1.50554	1.39295	1.8051	1.59724	1.50667	1.61142	1.54717	0.0531819	1.75155	1.44641	1.51304	1.2504	1.48856	1.76784	1.47495	2.09418	1.59837	0.0922685	1.52453	1.61599	1.62759	1.58573	1.31197	1.4075	1.51222	0.0518654	1.75551	1.48534	1.64388	1.41988	2.35785	1.63351	1.62155	1.6293	1.69335	0.101662			25.9997	4.48408	4.80771	3.78775	5.79212	3.95876	4.03818	5.21037	3.54307	4.45275
9.33332	1.22089	1.51128	1.43422	1.8691	1.36753	1.65315	1.2196	1.46797	0.0887794	1.7695	1.55256	1.4252	1.62716	1.67461	1.70119	1.51857	1.59669	1.60818	0.0387727	1.66857	1.70217	1.54621	1.50987	1.49986	1.63646	1.59386	0.0352549	1.96654	1.43872	1.51269	1.77088	1.78174	1.62219	1.69093	1.51253	1.66203	0.0620839			26.6664	5.05374	5.00412	3.86718	6.06218	4.17928	4.02803	5.77572	3.42404	4.67428
9.66666	1.88646	1.49653	1.19734	1.8051	1.29914	2.07205	1.40886	1.59507	0.124085	1.43967	1.48895	1.53005	1.34674	1.53538	1.54393	1.51224	1.67327	1.50878	0.0329741	1.57579	1.66083	1.50091	1.52254	1.47745	1.56259	1.55002	0.0267912	1.77226	1.41646	1.65972	1.54895	1.92095	1.37943	1.59113	1.49496	1.59798	0.0644028			27.3331	4.53447	5.57033	3.6526	5.78252	3.83126	3.74572	5.38145	3.52288	4.50265
9.99999	1.28634	1.45766	1.22806	1.36739	1.69415	1.82874	1.32353	1.45513	0.0847664	1.56097	1.41471	1.34515	1.20849	1.5942	1.69414	1.5007	1.74061	1.50737	0.0632414	1.72721	2.06994	1.61568	1.6723	1.48731	1.77847	1.72515	0.0802231	2.07432	1.09416	1.2277	1.926	2.23866	1.68906	1.50364	1.72975	1.68541	0.140745			27.9997	4.92893	4.8991	3.1452	5.7147	3.94042	4.32861	5.28813	3.3773	4.4528
10.3333	1.53176	1.47698	1.55395	1.32388	1.61075	1.50515	1.68585	1.5269	0.0428824	1.70275	1.24666	1.37152	1.42082	1.73872	1.59841	1.52423	1.4198	1.50286	0.0600136	1.52285	1.9106	1.51085	1.52608	1.31677	1.45832	1.54091	0.0806605	1.82039	0.998395	1.39951	1.77282	1.90147	1.69179	1.76296	1.76783	1.6394	0.105406			28.6664	5.18025	5.09126	3.69587	5.75071	3.84996	4.03043	5.20273	3.54856	4.54372
10.6667	1.48117	1.37314	1.24564	1.43318	1.38105	1.43742	1.33975	1.38448	0.0292527	1.607	1.21155	1.44548	1.41184	1.36195	1.53352	1.42644	1.66081	1.45733	0.050406	1.60684	1.45305	1.4711	1.60322	1.44815	1.72326	1.55094	0.0454884	1.68854	1.32083	1.50998	1.44495	1.94543	1.57146	1.51244	1.52195	1.56445	0.0656969			29.333	4.7921	5.05283	3.82825	5.84853	3.95718	3.97836	4.997	3.54993	4.50052
11	1.1925	1.65809	1.0913	1.57294	1.31916	1.86298	1.00481	1.38597	0.120569	1.50849	1.34699	1.19255	1.55028	1.53894	1.6349	1.37416	1.72331	1.4837	0.060331	1.55428	1.65624	1.66528	1.63781	1.27527	1.48552	1.54573	0.0610537	1.70319	1.4656	1.20089	1.39157	1.97581	1.53561	1.40396	1.56297	1.52995	0.0820893			29.9997	4.71814	5.28052	3.21672	6.26502	3.61317	3.85594	4.65484	3.38852	4.37411
11.3333	1.25477	1.43542	1.19827	1.3976	1.47563	1.54414	1.00375	1.32994	0.0710802	1.4162	1.39344	1.69903	1.26873	1.44785	1.56861	1.32787	1.59001	1.46397	0.0511034	1.56307	1.86631	1.51264	1.59978	1.29399	1.5878	1.5706	0.0749497	1.48659	1.01744	1.49035	1.3762	1.54837	1.38257	1.46806	1.59645	1.42075	0.0633415			30.6664	4.52261	5.01976	3.51192	5.72401	3.89586	3.96506	4.56589	3.47103	4.33452
11.6667	1.75979	1.5642	1.31023	1.08173	1.36653	1.22036	1.40408	1.3867	0.0842239	1.49399	1.30415	1.32253	1.32953	1.60692	1.68938	1.54132	1.72539	1.50165	0.0595721	1.54642	1.66695	1.55525	1.52235	1.24954	1.29063	1.47186	0.0671799	1.42171	1.14134	1.26019	1.29241	1.40059	1.65405	1.39654	1.62867	1.39944	0.0620111			31.333	4.45697	5.00836	4.15487	5.73781	3.87339	4.01861	4.52742	3.6115	4.42362
12	2.02789	1.53458	1.39665	1.35332	1.45745	1.7515	1.21986	1.53446	0.103198	1.60977	1.26803	1.43269	1.64624	1.65323	1.66241	1.51591	2.01784	1.60076	0.0766269	1.4007	1.76089	1.46402	1.66002	1.24584	1.5645	1.516	0.0757287	1.53647	1.21359	1.56021	1.5805	1.48565	1.44127	1.56737	1.41	1.47438	0.0432005			31.9997	4.73494	4.92948	3.7917	6.1723	3.94819	4.02803	4.48704	3.4643	4.4445
12.3333	1.46167	1.72704	1.49714	1.43881	1.27445	1.36665	1.42269	1.45549	0.0529004	1.58169	1.45213	1.38307	1.34188	1.58067	1.56879	1.23186	1.69356	1.4792	0.0542454	1.54614	1.66345	1.45659	1.47449	1.39508	1.34312	1.47981	0.0463875	1.45136	1.08548	1.16474	1.87521	1.54944	1.59074	1.53494	1.52551	1.47218	0.0880069			32.6663	4.98625	5.09841	3.61368	6.57618	3.65445	3.91687	4.46494	3.439	4.46872
12.6667	1.42778	1.55717	1.41405	1.51842	1.50732	1.45607	1.56012	1.49156	0.0225253	1.61943	1.31177	1.22751	1.44177	1.75796	1.81315	1.35318	1.58009	1.51311	0.07542	1.49376	2.08459	1.54943	1.48668	1.32526	1.44292	1.56377	0.108596	1.83295	1.40456	1.32897	1.38623	1.80694	1.36056	1.3313	1.8122	1.53296	0.0837777			33.333	4.37807	4.96032	3.73144	5.74351	3.83769	3.65875	4.69632	3.33904	4.29314
13	1.72871	1.55963	1.37315	1.21023	1.4014	1.51485	1.73077	1.50268	0.0722216	1.51126	1.20803	1.16821	1.76878	1.65028	1.61921	1.29946	1.58608	1.47641	0.078793	1.49255	1.6617	1.62839	1.58376	1.38966	1.32948	1.51426	0.0546919	1.4109	1.24901	1.16921	1.25246	1.71205	1.49053	1.38975	1.34324	1.37715	0.0601591			33.9997	5.11399	5.03249	3.51231	5.46355	3.43309	3.93497	4.37244	3.45109	4.28924
13.3333	1.44921	1.55495	1.27396	1.44239	1.42742	1.64706	1.50881	1.47197	0.0440471	1.61391	1.3216	0.935413	1.19633	1.9209	1.49685	1.40224	1.32062	1.40098	0.103185	1.53997	2.2459	1.55955	1.55566	1.31357	1.54368	1.62639	0.129798	1.78551	1.01296	1.55778	1.32687	1.25371	1.35385	1.47598	1.49935	1.40825	0.0809867			34.6663	4.89565	5.0926	3.17661	5.96196	3.56751	3.90506	4.83083	3.34265	4.34661
13.6667	1.48658	1.64193	1.14738	1.68633	1.63577	1.81751	1.81557	1.60444	0.0875418	1.53657	1.25719	1.17477	1.26013	1.4104	1.74527	1.49815	1.36744	1.40624	0.0653346	1.51537	1.52599	1.50368	1.55517	1.40247	1.59546	1.51636	0.0264501	1.31882	1.29535	1.22797	1.42829	1.8945	1.43477	1.31408	1.5094	1.4279	0.0740173			35.333	4.2944	4.99898	3.70654	5.32852	3.91286	3.77175	4.32251	3.2412	4.1971
14	1.43801	1.329	1.27951	1.44931	1.2104	1.62823	1.18717	1.36023	0.0588987	1.44382	1.21205	1.08162	1.14564	1.61507	1.46794	1.37616	1.30056	1.33035	0.0635046	1.52117	1.58767	1.49625	1.47537	1.28229	1.42242	1.4642	0.0426137	1.43706	1.19959	1.40005	1.25828	1.54033	1.49326	1.34111	1.35957	1.37866	0.0404156			35.9996	5.13372	4.87005	3.46766	6.06668	3.5969	3.66743	4.77572	3.2513	4.35368
14.3333	1.15775	1.41341	1.37241	1.33002	1.32316	1.621	1.14915	1.33813	0.0608269	1.26153	1.3215	1.4124	1.40866	1.15901	1.5099	1.56674	1.27703	1.3646	0.047924	1.6247	1.94199	1.38399	1.51537	1.27774	1.50124	1.54084	0.0938078	1.59786	1.1804	1.26913	1.4464	1.67596	1.46056	1.69797	1.46482	1.47414	0.0648471			36.6663	4.28993	5.00546	3.70121	5.54607	3.53667	3.60798	4.66958	3.27822	4.20439
14.6667	1.34215	1.49583	1.3589	1.51944	1.42141	1.25537	1.17786	1.36728	0.0467295	1.38282	1.17733	1.18366	1.16416	1.71247	1.53635	1.36006	1.58078	1.3872	0.0733742	1.49227	1.82694	1.45991	1.46329	1.34078	1.41014	1.49889	0.06912	1.31114	1.43494	1.19128	1.50124	2.21579	1.36119	1.51797	1.46566	1.4999	0.109245			37.333	4.36313	4.78	3.39257	5.86503	3.66052	3.6534	4.39918	3.41519	4.19113
15	1.57897	1.46094	1.59874	1.54555	1.07294	1.45854	1.72918	1.49212	0.0780373	1.44658	1.27806	1.27806	1.2807	1.5997	1.50673	1.22276	1.5794	1.399	0.0536189	1.379	1.98639	1.39016	1.5252	1.29941	1.40112	1.49688	0.102285	1.24103	1.71481	1.1707	1.41114	1.51514	1.42555	1.47825	1.5885	1.44314	0.0623576			37.9996	4.22876	4.84815	3.38704	5.65499	3.82482	3.49701	4.60491	3.30439	4.16876
15.3333	1.6423	1.50203	1.34391	1.15008	1.09546	1.06228	1.26425	1.29433	0.0819106	1.5276	1.26091	1.10658	1.22963	1.45009	1.31667	1.14373	1.22053	1.28197	0.0511704	1.62124	1.55016	1.52463	1.45238	1.44064	1.33818	1.48787	0.0403807	1.78237	1.18768	1.28984	1.28206	1.77889	1.5767	1.39202	1.25975	1.44366	0.0841542			38.6663	4.91522	4.89105	3.81818	5.7225	3.48931	3.44661	4.2221	3.53385	4.25485
15.6667	1.47393	1.3811	1.2425	1.22328	1.20339	2.10743	1.16643	1.39972	0.124931	1.49768	1.27696	1.4486	1.21429	1.76702	1.42986	1.22798	1.85155	1.46424	0.0842609	1.46346	1.52796	1.51389	1.38379	1.10769	1.40351	1.40005	0.0630055	1.52147	1.04446	1.90478	1.53973	1.4215	1.37502	1.51797	1.55585	1.4851	0.084182			39.3329	4.13924	4.67118	3.11674	5.30332	3.6411	3.48575	4.11951	3.3889	3.98322
16	2.08447	1.52907	1.57357	1.43343	1.04375	1.50667	1.67841	1.54991	0.116995	1.59941	1.29462	1.22048	1.22196	1.64936	1.56473	1.40247	1.40896	1.42025	0.0598985	1.49909	1.81174	1.45713	1.42722	1.41663	1.55118	1.52717	0.0604045	1.37986	1.32153	1.42009	1.48814	2.27047	1.48844	1.53519	1.27356	1.52216	0.111416			39.9996	4.24371	4.80771	3.31176	5.73901	3.55828	3.5031	4.5869	3.38391	4.1418
16.3333	1.75786	1.55565	1.21548	1.85707	1.39873	1.19221	1.15181	1.44697	0.107414	1.44888	1.23613	1.05072	1.25751	1.56235	1.66293	1.30523	1.30379	1.35344	0.0691702	1.44513	1.74274	1.47638	1.4004	1.23981	1.17424	1.41311	0.0818408	1.39834	0.817505	1.15486	1.18452	1.64862	1.38425	1.43274	1.23024	1.28139	0.0871391			40.6663	4.75836	4.82983	3.94799	5.57517	3.55172	3.46045	3.98281	3.56015	4.20831
16.6666	1.44709	1.51128	1.37685	1.47004	1.1787	1.25137	1.18052	1.34512	0.0530488	1.50619	1.28077	0.938222	1.32579	1.48917	1.66558	1.37472	1.3257	1.36327	0.0753668	1.44363	1.62955	1.35158	1.42939	1.45591	1.32206	1.43869	0.0439796	1.39137	1.38034	1.46829	1.35906	1.26693	1.40647	1.52249	1.41021	1.40064	0.0266107			41.3329	4.66791	4.7619	3.456	5.95505	3.2887	3.64564	4.25375	3.35213	4.17264
17	1.61961	1.61524	1.31689	1.5883	1.1727	1.43799	1.5245	1.46789	0.0642294	1.48225	1.19319	0.953669	1.47807	1.67328	1.40182	1.31722	1.3566	1.35701	0.0760031	1.57663	1.66378	1.38587	1.38261	1.24178	1.37416	1.43747	0.0628641	1.40915	1.33693	1.27955	1.13988	2.006	1.30144	1.17556	1.32901	1.37219	0.0956569			41.9996	4.55389	4.7943	3.4645	5.15419	3.45652	3.47836	3.99563	3.35487	4.03153
17.3333	1.23238	1.60084	1.28303	1.47285	1.41157	1.45797	1.30838	1.39529	0.048589	1.36763	1.14362	1.17539	1.07025	1.77241	1.41487	1.25917	1.19446	1.29973	0.0786622	1.39462	2.08547	1.31496	1.48196	1.3803	1.27866	1.48933	0.122621	1.75656	1.13266	1.23677	1.2984	1.49244	1.44232	1.41175	1.41062	1.39769	0.0662943			42.6662	4.18038	4.618	3.3335	5.28261	3.2762	3.49627	4.16235	3.36197	3.96391
17.6666	1.53745	1.46293	1.17884	1.59393	1.76789	1.66837	1.42189	1.51876	0.0721267	1.37039	1.12286	1.15838	1.24928	1.34465	1.41663	1.35385	1.42994	1.30575	0.0409881	1.42988	1.61599	1.51702	1.52952	1.28241	1.32398	1.4498	0.0525166	1.41892	1.18894	1.20428	1.80501	1.61788	1.41003	1.38774	1.28486	1.41471	0.0739804			43.3329	4.95929	4.81597	3.34713	5.39364	3.48069	3.48833	4.22592	3.44074	4.14396
18	1.63525	1.70632	1.34021	1.4447	1.23592	1.2002	1.13241	1.385	0.0833273	1.54532	1.351	1.10065	1.04686	1.27422	1.66417	1.30146	1.37182	1.33194	0.0728116	1.41613	1.98212	1.39088	1.42732	1.28832	1.20072	1.45092	0.11204	1.73145	1.33077	1.49983	1.14247	2.2392	1.33142	1.43249	1.41146	1.51489	0.119186			43.9996	4.20781	4.89999	3.43545	5.48666	3.47607	3.6534	4.10232	3.38403	4.08072
18.3333	1.539	1.63303	1.37852	1.52456	1.60391	1.62557	1.11938	1.48914	0.069896	1.36326	1.27937	1.19614	1.30053	1.68244	1.38102	1.18347	1.46316	1.35617	0.0571647	1.38096	1.53058	1.43833	1.51645	1.35999	1.1925	1.40314	0.0506755	1.38474	1.08072	1.2059	1.29177	1.60198	1.27524	1.19919	1.2767	1.28953	0.0544158			44.6662	4.19548	4.85038	3.65754	5.76421	3.30206	3.36001	3.65048	3.38665	4.02085
18.6666	1.52066	1.68689	1.21529	1.21944	1.03925	1.55917	1.44422	1.38356	0.0871674	1.4353	1.4422	1.14044	1.26349	1.23097	1.36515	1.12419	1.53189	1.3167	0.0529109	1.59496	1.66389	1.53717	1.53935	1.25483	1.39905	1.49821	0.060301	1.66273	1.05902	1.48738	1.25958	2.23688	1.28446	1.49019	1.38593	1.48327	0.125301			45.3329	4.72831	4.40751	2.89347	5.41974	3.24693	3.53098	4.13124	3.18299	3.94265
19	1.53745	1.58679	1.2908	1.63949	1.38371	1.61872	0.924001	1.42585	0.0967402	1.42794	1.22629	1.21924	1.07866	1.33081	1.40288	1.32155	1.1548	1.27027	0.0429543	1.52416	2.00553	1.44182	1.38153	1.19056	1.31672	1.47672	0.11542	1.29754	1.08856	1.18614	1.09362	2.05765	1.3723	1.34576	1.24363	1.33565	0.109759			45.9995	4.38948	4.57934	3.35958	5.60878	3.61377	3.32992	3.93097	3.62733	4.0549
19.3333	1.69579	1.63081	1.25582	1.50024	1.44694	1.46729	1.00694	1.42912	0.0882221	1.56373	1.11062	1.38557	1.11383	1.46597	1.60969	1.29757	1.28741	1.3543	0.066471	1.52566	1.51101	1.65319	1.5078	1.28192	1.28473	1.46072	0.0602635	1.58739	1.24803	1.36052	1.24793	1.92899	1.39599	1.44066	1.34115	1.44383	0.0793372			46.6662	4.01119	4.83094	3.68579	5.08967	3.58342	3.66337	3.72797	3.10609	3.96231
19.6666	1.47509	1.67366	1.2623	1.13113	0.978192	0.740588	1.48888	1.24998	0.122947	1.40906	1.06376	1.33439	1.12263	1.60509	1.47975	1.31467	1.45808	1.34843	0.06439	1.53501	1.63043	1.6318	1.3775	1.34792	1.38708	1.48496	0.053271	1.63169	1.47834	1.34116	1.14263	2.19488	1.32178	1.42394	1.29218	1.47833	0.114221			47.3329	3.84277	4.73687	3.44573	5.91364	3.54262	3.28819	3.75553	3.10834	3.95421
20	1.65987	1.58585	1.10481	0.990862	1.25877	1.38815	1.88283	1.41016	0.120425	1.40998	1.09386	1.15526	0.988121	1.41253	1.50126	1.3423	1.27334	1.27208	0.0629969	1.49264	1.69659	1.48059	1.39096	1.20977	1.67643	1.49116	0.0743553	1.25219	1.4054	1.19575	1.28966	2.20149	1.23058	1.37077	1.26519	1.40138	0.116946			47.9995	3.68283	4.74626	3.32915	4.85022	3.51517	3.28486	4.07067	3.14909	3.82853
20.3333	1.9468	1.64989	1.22085	1.41373	1.68882	1.46786	1.58032	1.56689	0.0871888	1.41436	1.26121	1.22142	1.28557	1.28155	1.46476	1.1838	1.46131	1.32175	0.0387744	1.53155	1.72841	1.54227	1.42624	1.34743	1.44891	1.50413	0.0535974	1.23162	1.02332	1.32504	1.3369	1.17669	1.40081	1.39692	1.32859	1.27749	0.0452655			48.6662	3.95341	4.74536	3.50718	5.16859	3.2983	3.33213	3.8292	3.12865	3.87035
20.6666	1.85576	1.54301	1.13664	1.53582	1.02557	2.29558	1.43066	1.54615	0.162543	1.30848	1.16971	1.15121	1.25713	1.32664	1.37573	1.31378	1.08883	1.24894	0.0357052	1.33532	1.66509	1.61855	1.56519	1.14352	1.41285	1.45675	0.0808554	1.5267	1.12566	1.4756	1.15428	2.0312	1.46475	1.38988	1.31374	1.43522	0.0997884			49.3328	3.92752	4.89887	3.53464	5.48666	3.53399	3.28173	3.6251	3.13252	3.92763
21	1.68275	1.60903	1.48678	1.28292	1.41307	1.69747	1.26293	1.49071	0.0680923	1.50987	1.18988	1.21003	1.31232	1.01571	1.26201	1.39259	1.41103	1.28793	0.0545137	1.49189	1.49985	1.43923	1.31029	1.64528	1.33515	1.45361	0.0500416	0.937227	1.1055	1.46382	1.13778	1.34037	1.32723	1.39918	1.36166	1.2591	0.0634162			49.9995	3.88068	4.74291	3.69923	4.7389	3.07037	3.39325	3.6251	3.26177	3.80152
21.3333	1.54402	1.80501	1.4159	1.53096	1.34935	2.07795	1.659	1.62603	0.0943424	1.3987	1.18596	0.901866	1.22776	1.3816	1.3343	1.20933	1.49268	1.26652	0.0641832	1.53716	1.42779	1.4634	1.36856	1.39139	1.48217	1.44508	0.0253165	1.13918	1.20855	1.02773	1.25375	1.56999	1.26308	1.39868	1.33445	1.27443	0.0583167			50.6662	3.90025	4.83586	3.48682	4.93844	3.50558	3.2869	3.60491	3.2321	3.84886
21.6666	1.7763	1.69778	1.20308	1.55349	1.53051	1.98321	1.29536	1.5771	0.102489	1.46453	1.23693	1.07662	1.52128	1.6745	1.27559	1.23597	1.13404	1.32743	0.0727499	1.58261	1.62244	1.52786	1.3323	1.34792	1.20168	1.4358	0.067851	1.58495	1.10172	1.34413	1.53569	1.56517	1.27398	1.29824	1.62093	1.4156	0.0661561			51.3328	3.85356	4.42918	3.16337	5.216	3.1102	3.06072	3.55825	3.16704	3.69479
22	1.44892	1.4401	1.38462	1.21791	0.924812	1.64212	1.3456	1.34344	0.0848508	1.21918	1.15606	1.31894	1.12824	1.42515	1.14759	1.30445	1.26366	1.24541	0.0362292	1.29679	2.05474	1.50682	1.42732	1.30975	1.26398	1.47657	0.121513	1.19604	1.13532	1.04493	1.18452	1.40899	1.34316	1.5186	1.18713	1.25234	0.0554873			51.9995	3.75895	4.38785	2.81048	4.96515	3.2938	3.2869	3.85484	2.93883	3.6621
22.3333	1.72195	1.55214	1.38407	1.13369	1.15852	1.74389	1.18052	1.41068	0.100228	1.31101	1.2897	1.01156	1.03826	1.36959	1.36392	1.19934	1.43179	1.25189	0.0550733	1.53632	1.80835	1.44021	1.54888	1.25914	1.37551	1.49474	0.0765305	1.28324	1.0593	1.31029	1.26508	1.33698	1.38509	1.36838	1.16056	1.27111	0.039096			52.6661	4.04555	4.41421	3.33844	4.77641	3.35756	3.08047	3.66658	3.1041	3.72291
22.6666	1.78596	1.76755	1.45384	1.48105	1.17803	1.70889	1.54682	1.56031	0.0816317	1.55752	1.28589	0.984563	1.06426	1.09276	1.213	1.22032	1.28464	1.21287	0.0623866	1.40126	1.77839	1.50073	1.53247	1.31529	1.51991	1.50801	0.0638836	1.50856	0.794403	1.47086	1.21348	1.1297	1.32198	1.40924	1.34806	1.27453	0.0817603			53.3328	3.70163	4.18987	2.82629	5.02066	3.34881	3.15839	3.41064	3.13052	3.59835
23	1.81164	1.63655	1.36316	1.02081	1.62793	1.99805	1.41471	1.55326	0.121101	1.38121	1.22409	1.1615	1.22234	1.34292	1.26183	1.24241	1.70463	1.31762	0.0605674	1.46804	1.59631	1.54057	1.4624	1.26025	1.46494	1.46542	0.0465078	1.4831	1.1062	1.04276	1.19552	0.894536	1.35574	1.39277	1.23694	1.21345	0.0692214			53.9995	3.55479	4.33467	2.99009	4.62067	3.32914	3.3133	3.36453	3.10385	3.57638
23.3333	1.76394	1.89165	1.35686	1.42012	1.31582	1.81085	1.08163	1.52013	0.114712	1.38443	0.977082	0.988932	1.43859	1.53344	1.32866	1.2312	1.36721	1.28119	0.0718525	1.45906	1.77653	1.64782	1.54819	1.34016	1.32828	1.51668	0.0720379	1.11337	1.22339	1.22093	1.49574	1.05232	1.31402	1.44682	1.2723	1.26736	0.0535536			54.6661	3.78915	4.57398	3.53899	5.39904	3.39447	3.37663	3.43247	3.16118	3.83324
23.6666	1.37468	1.96048	1.39036	1.52763	1.13933	1.80458	1.26266	1.49425	0.111214	1.3674	1.18937	1.21799	1.24273	1.51706	1.27153	1.23164	1.17578	1.27669	0.0401931	1.38443	1.80037	1.58014	1.41376	1.36343	1.17216	1.45238	0.0875523	1.16674	1.08492	1.09624	1.74629	1.23602	1.2266	1.27901	1.35894	1.27434	0.0747431			55.3328	3.75756	4.43633	3.52812	4.72179	3.22131	3.28948	3.41119	2.86779	3.6542
24	1.93936	1.57555	1.36741	1.47439	1.37337	1.78974	1.57899	1.58555	0.0804718	1.4788	1.08483	1.07615	1.18305	1.27453	1.32531	1.29302	1.01434	1.21625	0.0549163	1.55484	1.88425	1.53744	1.30655	1.30384	1.51209	1.5165	0.0868847	1.05338	1.05454	1.43187	1.16819	0.862192	1.23792	1.17468	1.28109	1.15798	0.0606624			55.9994	3.67374	4.26674	3.22561	4.63898	3.04791	3.09081	3.06958	2.93172	3.49314
24.3333	1.54441	1.77352	1.58079	1.38813	1.25177	1.86812	1.88229	1.61272	0.0913093	1.30227	1.02273	1.08614	1.17052	1.20145	1.3447	1.25639	0.993811	1.17225	0.0455502	1.48955	1.96769	1.52436	1.28248	1.32231	1.22098	1.4679	0.111054	1.4695	1.14806	1.44473	1.12451	1.08931	1.27188	1.35179	1.22271	1.26531	0.0513682			56.6661	3.57127	4.35612	3.29418	5.02726	3.35707	3.26049	3.30668	3.07456	3.65595
24.6666	1.51592	1.63175	1.10204	1.79947	1.26177	1.37845	1.90462	1.51343	0.109071	1.43898	1.18817	1.005	1.64045	1.35737	1.10351	1.1243	1.22445	1.26028	0.0732661	1.80447	1.72622	1.48578	1.36974	1.34472	1.3026	1.50559	0.0863986	1.56995	1.23753	1.24097	1.69858	1.5087	1.42827	1.28379	1.34115	1.41362	0.059435			57.3328	3.70502	4.41444	3.14697	5.29642	3.13546	2.80666	3.27831	3.00451	3.59847
25	2.25468	1.59276	1.35224	1.41654	1.42408	1.94117	1.70738	1.66984	0.124253	1.37362	1.10741	1.03683	1.21336	1.50902	1.3611	1.23752	1.32362	1.27031	0.0541336	1.54305	1.70971	1.57531	1.53768	1.1599	1.88505	1.56845	0.0981057	1.69099	1.14008	1.35903	1.18064	0.868268	1.22639	1.43626	1.34052	1.28027	0.0850506			57.9994	4.31582	4.21825	2.98811	4.55196	3.09806	2.84045	3.60819	3.01087	3.57896
25.3333	1.58157	1.73067	1.33725	1.24837	1.41791	1.08663	1.8076	1.45857	0.0987889	1.25232	1.25489	1.29226	1.48181	1.30129	1.34805	1.24529	1.01711	1.27413	0.0457867	1.66894	1.60899	1.66671	1.48746	1.20866	1.41548	1.50937	0.0729993	1.37916	1.13686	1.07796	1.38704	0.770702	1.17419	1.19316	1.21287	1.16649	0.0684203			58.6661	3.94894	4.54158	3.01874	4.96875	2.99351	3.00994	3.27203	3.07593	3.60368
25.6666	1.54083	1.7295	1.2512	1.00827	1.03658	1.59551	1.37431	1.36231	0.105223	1.317	1.09226	1.09519	1.26892	1.40857	1.2814	1.1263	1.40734	1.24962	0.0462681	1.44475	1.57717	1.53359	1.35618	1.17861	1.26279	1.39218	0.0634111	1.60762	1.37782	1.33249	1.02714	1.13523	1.43792	1.24821	1.16642	1.29161	0.065782			59.3327	3.57682	4.3579	3.02348	4.96665	2.91822	2.96489	3.16971	3.06197	3.50496
26	1.92662	1.83159	1.30061	1.66739	1.56254	2.16583	1.33709	1.68452	0.119041	1.31792	1.15245	0.925271	1.45431	1.57446	1.18972	1.2343	1.07938	1.24098	0.0730621	1.48235	1.59915	1.58954	1.42644	1.17603	1.62513	1.48311	0.0689141	1.32021	1.25405	1.18343	1.4168	1.36575	1.36727	1.35795	1.2045	1.30874	0.0300195			59.9994	3.53737	4.14205	3.079	5.08907	3.07074	3.00976	3.10396	2.99816	3.50376
26.3333	1.59364	1.7864	1.53341	1.58651	1.01122	1.73305	1.51413	1.53691	0.0955278	1.2438	1.12105	1.23749	1.30371	1.47635	1.43321	1.25428	1.17901	1.28111	0.0426402	1.40107	1.62944	1.39142	1.42428	1.32194	1.07164	1.3733	0.0736981	1.60588	1.31747	1.2189	1.7636	1.08806	1.36391	1.24608	1.03856	1.33031	0.0874525			60.6661	3.4064	3.95905	3.13828	4.72539	2.95173	2.82697	3.36889	3.07443	3.43139
26.6666	2.02992	1.73617	1.36408	1.38096	0.939992	1.37731	1.46974	1.47117	0.128452	1.27879	1.19278	1.20504	1.52278	1.15586	1.23327	1.2827	1.11674	1.24849	0.0440135	1.53323	1.55049	1.41192	1.51674	1.21235	1.44252	1.44454	0.0514079	1.50996	1.48632	1.33344	1.15945	0.98281	1.3201	1.50062	1.33571	1.32855	0.0648744			61.3327	3.68684	4.22965	3.27343	4.33591	3.04281	2.95621	3.3498	2.82254	3.46215
27	1.89225	1.83662	1.35557	1.04513	1.1033	1.77699	1.4708	1.49724	0.131822	1.2438	1.11995	1.32924	1.54242	1.19433	1.14459	1.33609	1.14972	1.25752	0.0499938	1.48413	1.77194	1.5412	1.65736	1.19524	1.49725	1.52452	0.0795702	0.97141	1.31523	1.41724	1.40192	0.786248	1.29913	1.3944	1.14884	1.2168	0.0815769			61.9994	3.28406	4.02452	3.31611	5.15118	2.94323	2.80592	2.71514	2.99055	3.40384
27.3333	1.72649	1.77305	1.61391	1.42396	1.518	1.20229	1.71164	1.56705	0.0766698	1.19915	0.96735	1.03137	1.56337	1.12858	1.23592	1.15993	1.03602	1.16521	0.0654387	1.37133	1.60648	1.58318	1.4115	1.32095	1.23622	1.42161	0.0598365	1.68122	1.12216	1.18722	1.49558	1.15096	1.35783	1.43061	1.28172	1.33841	0.0680166			62.666	3.68992	3.98028	2.81424	5.16109	2.9742	2.89177	2.48076	3.02869	3.37762
27.6666	1.82853	1.70421	1.39369	1.30571	1.46228	1.49944	1.23634	1.49003	0.0800194	1.33058	1.01631	1.04729	1.26368	1.51645	1.3789	1.26272	1.25789	1.25923	0.058177	1.63826	1.61293	1.66179	1.389	1.27515	1.46191	1.50651	0.0638021	1.86399	1.3781	1.24557	1.35372	1.08788	1.38215	1.48152	1.26435	1.38216	0.0804			63.3327	4.04324	4.12999	3.03415	4.31191	3.00492	2.69347	3.21228	3.06559	3.43694
28	1.57897	1.71604	1.23602	1.27499	1.59173	1.3151	1.56198	1.46783	0.0711176	1.24427	1.23241	0.940718	1.21841	1.38892	1.30291	1.13507	1.49014	1.24411	0.0582012	1.40594	1.72841	1.42812	1.40089	1.26074	1.39179	1.43598	0.0633438	1.15802	1.16584	0.990229	1.1643	1.18991	1.31507	1.23841	1.27523	1.18713	0.0346819			63.9994	3.38822	4.04843	3.28904	3.85161	3.01063	3.04022	2.87995	3.11743	3.32819
28.3333	1.79619	1.83311	1.47586	1.19692	1.16502	1.89817	1.36314	1.53263	0.116819	1.37178	1.09115	0.978946	1.43579	1.14263	1.12696	1.24229	0.976514	1.17076	0.059662	1.34252	1.92252	1.49339	1.43548	1.36331	1.58189	1.52319	0.0875016	1.49531	1.28485	1.13916	1.09346	1.8341	1.31465	1.27222	1.07623	1.31375	0.0888136			64.666	3.446	4.538	2.899	4.42323	2.97966	2.69181	2.86985	2.88087	3.34105
28.6666	2.11218	1.59241	1.4357	1.30801	1.31065	1.62385	1.24272	1.51793	0.113329	1.55982	1.14051	1.40881	1.19184	1.40449	1.23239	1.23486	1.3144	1.31089	0.0491848	1.48497	1.66531	1.56331	1.39804	1.4319	1.0434	1.43115	0.0869176	1.27208	1.15506	1.37825	1.2468	1.25764	1.20186	1.24319	0.985617	1.21756	0.0400584			65.3327	3.5138	4.01089	2.99997	4.33801	2.71519	2.79669	2.78745	2.91851	3.26006
29	1.7904	1.88591	1.26822	1.44393	1.05159	1.44731	1.659	1.50662	0.111157	1.37132	1.09166	1.01359	1.2691	1.19209	1.24191	1.15849	1.29041	1.20357	0.0405823	1.43858	2.04282	1.48121	1.48628	1.31738	1.29941	1.51095	0.11133	1.4688	1.17732	1.14457	1.34256	1.86502	1.34043	1.35808	1.04128	1.34226	0.0892841			65.9993	3.56865	3.99257	3.38151	4.16098	2.85678	2.62313	2.91187	2.54585	3.25517
29.3333	1.76781	1.59604	1.54507	1.41808	1.11815	1.67617	1.5859	1.5296	0.0798478	1.27419	1.05624	0.934165	1.26948	1.42872	1.29569	1.16437	0.84828	1.15889	0.0700242	1.38246	1.55541	1.58059	1.35893	1.29423	1.23734	1.40149	0.056683	1.1493	1.33525	1.15391	1.66606	1.60019	1.23436	1.17631	1.12833	1.30547	0.0753862			66.666	3.7967	4.16686	3.12919	4.2789	2.89138	2.72523	2.54761	2.87489	3.30135
29.6666	2.24309	1.73992	1.17532	1.51944	1.11465	1.88581	1.21694	1.55645	0.159665	1.25163	1.19991	0.919186	1.29586	1.05866	1.21529	1.11798	1.18201	1.15506	0.0426403	1.39462	1.6757	1.49903	1.45661	1.30507	1.6225	1.49225	0.0567168	1.4695	1.11278	1.38272	1.44737	1.33734	1.27691	1.38196	1.28549	1.33676	0.0401754			67.3327	3.51164	3.97268	2.66269	4.22339	2.84937	2.83398	2.84502	2.81955	3.21479
30	1.81975	1.77083	1.33114	1.35588	1.14317	1.44731	1.55879	1.48955	0.0922814	1.35935	1.16299	1.12359	1.39781	1.33234	1.5062	1.25484	0.849433	1.24832	0.0719904	1.28744	1.63775	1.71917	1.3889	1.2568	1.36131	1.4419	0.0780306	1.45345	1.33385	1.18763	1.13664	1.49548	1.36496	1.32275	1.11703	1.30148	0.0500743			67.9993	3.69331	3.89	3.01499	5.01346	2.93036	2.59377	3.17954	2.86455	3.3975
30.3333	1.74493	1.76497	1.11407	1.23864	1.22658	1.39253	1.40939	1.41301	0.09624	1.17107	1.15948	0.925271	1.06557	0.956786	1.19078	1.15316	1.29963	1.11522	0.0442968	1.4412	1.52763	1.45874	1.53414	1.26862	1.11424	1.39076	0.0677827	1.31533	1.1811	1.06483	1.45756	1.6781	1.29473	1.13119	1.18023	1.28788	0.0706048			68.666	3.87282	3.80018	2.85435	4.64948	2.9759	2.77139	3.05675	2.92898	3.36373
30.6666	1.6758	1.88977	1.43033	1.43548	1.19588	1.56773	1.64093	1.54799	0.0834749	1.41044	1.29903	0.889072	1.37069	1.07027	1.15058	1.09755	0.96083	1.15606	0.0670057	1.44513	1.58165	1.53269	1.47184	1.26949	1.27555	1.42939	0.0532728	1.24766	1.48072	1.28077	1.26783	1.1204	1.2461	1.22986	1.20241	1.25947	0.0361707			69.3326	3.37774	3.88933	2.67869	4.39022	2.84318	2.69661	2.70969	2.90057	3.18575
31	1.85991	1.7953	1.34706	1.47311	1.12649	1.73571	1.4825	1.54572	0.100189	1.61805	1.03086	1.05961	1.19315	1.21163	1.35052	1.22831	1.26919	1.24517	0.0648062	1.58972	1.94199	1.52284	1.38733	1.31603	1.13459	1.48208	0.112852	1.04326	1.60729	1.09488	1.2489	1.05018	1.35008	1.28014	1.27691	1.24395	0.0662438			69.9993	3.57389	3.5888	3.17701	3.93743	2.77262	2.71102	2.95771	2.88511	3.20045
31.3333	1.59123	1.68139	1.27488	1.19897	1.70116	1.53083	1.07977	1.43689	0.0941943	1.27925	1.22539	0.990024	1.39164	1.09082	1.15023	1.22165	1.4221	1.22139	0.0514564	1.50517	1.55891	1.51174	1.35087	1.29633	1.30938	1.42207	0.0473466	1.45136	1.25587	1.06523	1.18469	1.42865	1.32073	1.26066	1.34847	1.28946	0.0449718			70.666	3.54569	3.96464	2.88754	4.09106	2.78367	2.41098	3.00518	2.86317	3.19399
31.6666	1.52519	1.79143	1.19327	1.31415	1.47846	1.64725	1.42827	1.48258	0.0754915	1.24288	1.00658	1.47092	1.3733	1.0722	1.36727	1.40646	1.11859	1.25727	0.0612378	1.58897	1.47951	1.49563	1.42319	1.25594	1.20761	1.40848	0.0602919	1.2794	1.25811	1.21145	1.1064	1.73225	1.25616	1.36725	1.21329	1.30304	0.0665782			71.3326	3.48005	3.90252	2.91659	4.04605	2.60092	2.51419	2.98881	2.84897	3.16226
32	1.20303	1.74624	1.2747	1.6633	1.3622	1.43381	1.55241	1.46224	0.0759686	1.30733	1.14583	0.904675	1.37405	1.26303	1.19078	1.16271	1.26688	1.20191	0.0503306	1.43372	1.75859	1.75767	1.37966	1.40345	1.28513	1.50304	0.0831819	1.0171	0.986214	1.02516	1.12095	1.16972	1.2375	1.22496	1.0666	1.10603	0.0343476			71.9993	3.34122	3.67482	2.90394	4.48204	2.69612	2.32919	2.82647	2.60929	3.10789
32.3333	1.66721	1.87994	1.55729	1.36228	1.31065	1.66114	1.75071	1.59846	0.0773641	1.32459	1.23934	0.916533	1.38696	1.24064	1.0679	1.10455	1.34507	1.2032	0.0569392	1.43587	2.11631	1.76546	1.46633	1.24818	1.5081	1.59004	0.125217	1.37253	1.06406	1.19331	1.65846	1.28176	1.27586	1.36122	1.13147	1.29234	0.0645592			72.6659	3.50702	3.86207	3.26553	4.11717	2.97323	2.079	2.63683	2.47692	3.11472
32.6666	1.70737	1.88966	1.53175	1.49	1.51266	1.49259	1.52662	1.59295	0.0569853	1.29835	1.12878	0.91154	1.40436	1.33508	1.20242	0.996322	1.36398	1.2051	0.0635466	1.31708	1.60352	1.55122	1.60224	1.18674	1.27428	1.42251	0.0753458	1.2515	1.21457	1.3	1.56157	1.06787	1.24421	1.28693	1.01345	1.24251	0.0583879			73.3326	3.15693	3.38501	3.31473	3.88942	2.61197	2.20327	2.63056	2.6235	2.97692
33	1.55811	1.6712	1.55395	1.29393	1.29247	1.5451	1.45432	1.4813	0.0540731	1.14138	1.27676	1.20098	1.20606	1.21743	1.13877	1.06203	0.990582	1.15425	0.0326137	1.53164	1.82979	1.4523	1.37043	1.31061	1.65122	1.52433	0.0783177	1.97038	1.20099	1.25816	1.23159	1.15739	1.0765	1.43375	1.27461	1.32542	0.0990392			73.9993	3.04029	3.54545	2.81542	4.14147	2.76145	1.9529	2.7648	2.665	2.96085
33.3333	2.00163	1.75163	1.4022	1.22891	1.04091	1.5957	1.20365	1.46066	0.12863	1.30296	1.18857	1.11204	1.32429	1.18812	1.10668	1.19379	0.905016	1.16518	0.0463144	1.49629	1.53692	1.48551	1.40855	1.36048	1.64372	1.48858	0.0405336	1.53751	1.0908	1.0517	1.12742	1.3402	1.20354	1.10517	1.16725	1.20295	0.0571285			74.6659	3.61657	3.6022	3.06557	3.60466	2.7838	2.08657	2.39727	2.83513	2.99897
33.6666	1.90393	1.88333	1.61613	1.21048	1.21123	1.74408	1.16138	1.53294	0.125114	1.34324	1.15647	1.00219	1.29866	1.32379	1.2472	1.35707	0.857967	1.19832	0.0641508	1.38676	1.52085	1.88202	1.3888	1.12751	1.17814	1.41402	0.110986	1.24452	1.14372	1.30447	1.11319	1.48333	1.30354	1.32062	1.07769	1.24888	0.0472425			75.3326	3.43598	3.76197	2.77353	3.70458	2.66504	1.85947	2.5528	2.84049	2.94923
34	1.93434	1.96517	1.36186	1.25298	1.29914	1.69177	1.29482	1.54287	0.118672	1.23851	1.23422	1.1576	1.25115	1.13041	1.48892	1.23674	1.11905	1.23208	0.0412	1.48591	1.60462	1.40028	1.49896	1.29608	1.34456	1.4384	0.0462119	1.09035	1.11754	0.942573	1.33463	1.61645	1.14211	1.15859	1.23233	1.20432	0.0710398			75.9992	4.05249	3.85649	2.66051	3.69588	2.42193	1.81331	2.44311	2.60094	2.94308
34.3333	1.75139	1.67904	1.20493	1.09863	1.00688	1.90065	1.06117	1.3861	0.142166	1.30526	1.15125	1.11157	1.12824	1.4507	1.20401	1.27793	0.77955	1.17606	0.0691218	1.37376	1.73246	1.50941	1.35785	1.30162	1.65417	1.48821	0.0713109	1.32858	0.891849	1.17612	1.16997	1.5389	1.18551	1.30842	1.09422	1.2117	0.0667989			76.6659	2.93443	3.62343	2.57674	3.75379	2.62472	1.86076	2.63029	2.60941	2.8267
34.6666	1.9804	1.71089	1.28266	1.33309	1.22991	1.45112	1.69648	1.52636	0.104588	1.38098	1.19118	0.898902	1.08502	1.32195	1.21423	1.28414	1.49937	1.23447	0.0653261	1.43315	1.68981	1.5548	1.45778	1.28906	1.20806	1.43878	0.0713012	1.36032	1.04894	1.07715	1.03361	1.30338	1.23142	1.20271	1.11347	1.17138	0.0430774			77.3326	3.39222	3.88822	2.82392	3.62146	2.51641	1.83492	2.23547	2.63434	2.86837
35	1.40615	1.81321	1.35335	1.33949	1.516	1.46234	1.04362	1.41917	0.0870676	1.39617	1.34809	0.908263	1.35347	1.32002	1.11144	1.1687	1.11928	1.21568	0.0592897	1.42053	1.66039	1.51765	1.45159	1.2009	1.28824	1.42322	0.0667397	1.29789	1.22325	1.23596	1.62013	1.81319	1.28907	1.35808	1.42465	1.40778	0.07343			77.9992	3.44569	3.35574	2.99977	3.56085	2.66977	2.21508	2.29441	2.72769	2.90863
35.3333	1.74328	1.79635	1.37778	1.57319	1.19338	1.71174	1.40009	1.54226	0.0850262	1.36809	1.08132	1.01733	1.23356	1.30974	1.09663	1.34364	1.10221	1.19407	0.0480838	1.41744	1.72032	1.59223	1.31461	1.20854	1.43152	1.44744	0.0755642	1.29091	1.43844	1.08405	1.07582	0.996569	1.40165	1.52865	0.839972	1.20701	0.0859056			78.6659	3.50363	3.32848	2.80041	3.38861	2.49758	1.85356	2.78663	2.73966	2.86232
35.6666	1.94158	1.84166	1.30209	1.51381	1.17303	1.6366	1.1558	1.50922	0.118977	1.40078	1.19589	1.00454	1.08016	1.38974	1.13683	1.16637	1.22076	1.19938	0.048998	1.36815	1.57772	1.71228	1.60175	1.28106	1.37591	1.48614	0.0685613	1.43706	1.26637	1.11898	0.868942	1.41793	1.30039	1.27449	0.963854	1.206	0.0726243			79.3325	3.26587	3.25385	2.56646	3.28629	2.64937	1.60523	2.66357	2.45486	2.71819
36	1.85257	1.57848	1.34095	1.64026	1.40056	1.47071	1.52955	1.54473	0.0641893	1.21457	1.15055	1.11282	1.25489	1.57497	1.11021	1.25906	0.951605	1.20358	0.0636703	1.38938	1.57301	1.55964	1.2924	1.38277	1.4095	1.43445	0.0448606	1.05408	1.04278	1.32951	1.28158	0.934563	1.35909	1.31647	1.06555	1.17295	0.0584007			79.9992	3.03336	3.46031	3.10983	3.67577	2.74178	1.70493	2.55034	2.65004	2.8658
36.3333	1.76086	1.86765	1.42423	1.24402	1.33584	1.3229	1.42322	1.48267	0.0895206	1.24357	1.1052	0.937598	1.56842	1.41182	1.27224	1.3332	1.34392	1.277	0.0676902	1.36029	1.55584	1.50503	1.44943	1.40419	1.30539	1.43003	0.0378137	0.841656	1.37586	1.16312	0.930085	1.11683	1.28802	1.2545	1.25745	1.15344	0.0650744			80.6659	3.42674	3.4154	2.99582	2.96162	2.33985	1.62388	2.45484	2.55432	2.72156
36.6666	1.59239	1.85313	1.5769	1.19743	1.00572	1.57858	1.8682	1.52462	0.120764	1.43001	1.19389	0.93198	1.16341	1.17072	1.22217	1.18613	1.18962	1.18599	0.0474704	1.3545	1.73071	1.82786	1.38772	1.38129	1.32805	1.50169	0.0890954	1.23127	0.943512	1.03274	1.10688	1.14417	1.22429	1.26242	1.22229	1.14595	0.0396719			81.3325	3.1557	3.37295	2.9233	3.82671	2.47014	1.79873	2.52742	2.37397	2.80611
37	1.37806	1.82012	1.41942	1.41065	1.4451	1.42125	1.35703	1.46452	0.0602896	1.31861	1.09767	0.96069	1.3907	1.65059	1.1996	1.22354	1.14972	1.24889	0.0738197	1.59281	1.59128	1.45552	1.34468	1.53176	1.4071	1.48719	0.0415136	1.40881	1.14302	0.944333	1.01306	1.08449	1.31905	1.17254	1.25535	1.16758	0.0551109			81.9992	3.12735	3.51417	2.46312	3.3418	2.37385	1.74057	2.27258	2.40376	2.65465
37.3333	1.64298	1.94398	1.72384	1.25989	1.39739	1.82969	0.996837	1.54209	0.127738	1.36027	1.04731	0.716344	1.36245	1.35127	1.11321	1.26461	0.917932	1.14167	0.0841182	1.45195	1.45709	1.4446	1.43518	1.24511	1.40335	1.40621	0.0331448	1.50019	1.0957	1.21592	1.26459	1.43937	1.32429	1.32514	0.979339	1.26807	0.0605703			82.6658	3.26649	3.3296	2.68225	3.68178	2.52066	1.64456	2.64638	2.66014	2.80398
37.6666	1.56265	2.00286	1.56265	1.34999	1.32783	1.43114	1.2297	1.49526	0.0964261	1.39111	1.17753	1.20036	1.24853	1.19402	1.20788	1.30934	0.971901	1.21258	0.0427195	1.44821	1.65033	1.86743	1.36984	1.17751	1.41987	1.48886	0.0977935	1.55216	1.09626	1.0563	1.09669	1.47171	1.18216	1.12955	0.846668	1.17894	0.0808998			83.3325	3.00331	3.44154	2.60796	3.97974	2.39923	1.72413	2.20491	2.39853	2.71992
38	1.62232	1.97957	1.30338	1.3482	1.34301	1.15245	1.53034	1.46847	0.103054	1.2758	1.20001	1.12218	1.15125	1.5022	1.02893	1.40746	1.52727	1.27689	0.0651398	1.49573	1.53933	1.82097	1.36325	1.29436	1.0651	1.42979	0.104104	1.39171	1.55731	1.09285	1.08715	1.6781	1.14547	1.22257	1.15951	1.29183	0.0796055			83.9992	3.13952	3.19352	2.51627	4.21289	2.39522	1.6765	2.24557	2.44514	2.72808
38.3333	1.65514	1.8893	1.40054	1.2796	1.26411	1.43229	1.32885	1.46426	0.0865582	1.28339	1.14071	0.849907	1.07717	1.47584	1.10739	1.24019	1.14626	1.16511	0.0637445	1.41202	1.30137	1.52087	1.50495	1.48718	1.09382	1.3867	0.0672765	1.2065	1.28331	0.99199	1.31069	1.35199	1.24064	1.28215	1.02035	1.21095	0.0473057			84.6658	3.53059	3.10392	2.65419	3.10025	2.34446	1.60154	2.12797	2.4748	2.61721
38.6666	1.47933	1.73208	1.48474	1.04846	1.2154	1.55099	1.38946	1.41435	0.0849201	1.27442	1.08453	1.04136	2.00861	1.46586	1.16592	1.38981	0.806535	1.27963	0.127464	1.33158	1.44988	1.60816	1.35598	1.22196	1.28824	1.37597	0.0557261	1.00489	0.953172	1.13212	0.963891	1.3427	1.24924	1.11308	0.99315	1.09403	0.0504689			85.3325	3.15216	3.15464	2.37441	2.96852	2.20567	1.38533	2.56126	2.3124	2.5143
39	1.83095	1.84529	1.55655	1.45801	1.26344	1.81333	1.55826	1.61797	0.0836393	1.36211	1.28167	1.11251	1.35123	1.27972	1.33289	1.28381	0.968211	1.24652	0.0483528	1.51022	1.45195	1.62266	1.46732	1.28094	1.4738	1.46782	0.045088	1.12802	1.30711	1.18993	1.19649	1.49065	1.16056	1.10253	1.20701	1.22279	0.0439559			85.9991	3.07219	3.24692	2.94998	3.65717	2.28569	1.79983	2.35416	2.35864	2.71557
39.3333	1.61855	1.88907	1.92556	1.34922	1.38021	1.68416	0.981153	1.54685	0.126431	1.30894	1.04821	1.00797	0.942101	1.37681	1.27312	1.30889	0.824755	1.13635	0.0725998	1.53454	1.35058	1.74236	1.43518	1.28685	1.48752	1.47284	0.0652236	1.35335	1.25475	1.18045	1.2654	1.6672	1.20207	1.09385	1.18441	1.27519	0.0620688			86.6658	3.30393	3.05677	2.92232	3.21008	2.18599	1.59083	2.22128	2.34231	2.60419
39.6666	1.3379	1.90183	1.323	1.78923	1.14984	1.44123	1.42162	1.48066	0.101456	1.32229	1.23562	0.886419	1.19035	1.21957	1.20101	1.31089	0.98989	1.16951	0.0541225	1.44391	1.3976	1.58148	1.44933	1.17197	1.42075	1.41084	0.0544759	1.08233	1.25461	1.4668	1.08504	1.1842	1.26622	1.08958	1.21518	1.20549	0.0459114			87.3325	3.29977	2.93476	2.22325	3.19387	2.16353	1.63662	2.45211	2.37808	2.53525
40	1.54276	1.81789	1.3924	1.51381	1.23925	1.8236	1.17919	1.50127	0.0963952	1.33242	1.31659	0.810587	1.08914	1.18975	1.11109	1.50592	1.00442	1.16999	0.0764969	1.39088	1.55049	1.68095	1.36915	1.20312	1.04667	1.37354	0.0934549	0.905835	1.28345	1.1049	1.22254	1.0659	1.34546	1.35971	1.09025	1.17226	0.0556753			87.9991	3.02165	2.88024	2.28233	3.88372	2.22692	1.76678	2.03874	2.30206	2.5503
																																								88.6658	2.99114	3.10972	2.719	2.79479	2.21647	1.8519	1.95525	2.25719	2.48693
																																								89.3324	3.18421	3.0304	2.74488	3.19867	2.22169	1.32384	2.21255	2.10687	2.50289
																																								89.9991	2.80669	2.64093	2.99641	3.25298	2.26359	1.91597	2.30205	2.3635	2.56777
																																								90.6658	3.13829	2.71668	2.24519	2.98473	2.1849	1.34378	1.95471	2.17069	2.34237
																																								91.3324	2.46216	2.6816	2.78657	3.40272	2.11593	1.33437	2.00628	2.5269	2.41456
																																								91.9991	2.93921	2.52407	2.40701	3.22628	2.20834	1.48614	1.8824	2.30928	2.37284
																																								92.6657	2.64644	2.96851	2.57693	3.00003	2.17676	1.74998	1.9397	2.21842	2.4096
																																								93.3324	2.28973	2.74908	2.49691	2.66546	1.91132	1.70733	1.98308	2.48178	2.28559
																																								93.9991	2.12594	2.70439	2.43428	2.67236	2.20652	1.88144	1.94243	2.25295	2.27754
																																								94.6657	2.69483	2.56272	2.10668	2.81729	1.99	1.76512	2.13015	2.21593	2.28534
																																								95.3324	3.00978	2.29615	3.1041	3.04624	2.10111	1.77639	2.15007	2.19886	2.46034
																																								95.999	2.80716	2.39179	2.77768	2.78489	2.01478	1.90895	2.15061	2.13579	2.37146
																																								96.6657	2.32271	2.48005	2.42736	2.55774	2.13256	1.7258	1.69086	2.19798	2.19188
																																								97.3324	2.85184	2.35872	2.25269	2.56164	1.99729	1.63182	1.98936	2.14526	2.22358
																																								97.999	2.24905	2.53613	2.09798	2.91001	1.8846	1.83012	1.85866	2.09104	2.1822
																																								98.6657	2.81085	2.38195	2.49869	2.73298	2.02425	1.82568	1.66658	2.16209	2.26288
																																								99.3323	2.1982	2.48765	2.65419	2.13495	2.07853	1.85246	1.71296	2.0893	2.15103
																																								99.999	2.3187	2.38352	2.46964	2.67896	1.96535	1.78396	1.54352	2.16059	2.16303
																																								100.666	2.39497	2.1022	2.19105	2.50643	1.94022	1.63237	1.61091	1.85049	2.02858
																																								101.332	2.76247	2.16342	2.05787	2.04283	1.83202	1.75571	1.81392	1.977	2.05066
																																								101.999	2.59513	2.41301	2.37125	2.25077	1.88084	1.75478	1.5618	2.02224	2.10623
																																								102.666	2.34228	2.39626	2.08791	2.30839	1.74034	1.84673	1.88786	2.09179	2.08769
																																								103.332	2.19343	2.15493	2.3669	2.78909	1.85546	1.98004	1.53206	2.03172	2.11295
																																								103.999	2.09435	2.06578	2.34477	2.18506	1.74751	1.77306	1.92169	1.88789	2.00251
																																								104.666	2.08495	2.3328	2.32936	2.43861	1.81174	1.8063	1.60709	2.062	2.05911
																																								105.332	2.67695	2.0193	2.10766	2.3984	1.69165	1.57292	1.50914	1.96229	1.99229
																																								105.999	2.22147	2.07449	2.23392	1.96841	1.8908	1.92871	1.61801	1.97787	1.98921
																																								106.666	2.46231	2.21079	2.36137	2.30058	1.6908	2.00275	1.61364	2.00679	2.08113
																																								107.332	2.31901	2.06555	2.33845	2.12025	1.72565	1.76217	1.66439	1.86458	1.98251
																																								107.999	2.25368	1.97126	2.0557	2.20486	1.82377	2.15397	1.50832	1.89063	1.98277
																																								108.666	2.10375	1.99003	2.24538	2.18386	1.79377	1.53082	1.66603	1.80724	1.91511
																																								109.332	1.57646	2.1375	1.97153	2.29488	1.69456	1.87849	1.54925	1.78942	1.86151
																																								109.999	2.44675	2.06667	2.21357	1.77157	1.68801	1.62702	1.49086	1.93188	1.90454
																																								110.666	2.1999	1.79518	2.29438	1.49341	1.66311	1.86741	1.50232	1.89948	1.8394
																																								111.332	2.00421	1.83875	2.06933	1.65305	1.62996	1.73614	1.54789	2.09915	1.82231
																																								111.999	2.04936	1.8973	2.0966	1.97922	1.69444	1.60154	1.66821	1.96616	1.8691
																																								112.666	1.88787	1.79809	2.27127	2.62165	1.66858	1.62738	1.59454	1.9441	1.92668
																																								113.332	2.20113	1.84367	2.18018	2.01192	1.57714	1.68739	1.30532	1.92316	1.84124
																																								113.999	1.96815	1.85573	2.04345	1.8799	1.54605	1.63311	1.68295	1.98024	1.8237
																																								114.666	1.48601	1.6877	2.35504	1.87089	1.51776	1.79023	1.72196	1.87019	1.78748
																																								115.332	1.94257	1.58693	2.07427	2.07434	1.54727	1.85892	1.60491	1.85822	1.81843
																																								115.999	1.8267	1.68212	2.41076	1.63354	1.54642	1.85781	1.75498	1.94185	1.83177
																																								116.665	1.42315	1.66759	2.49296	1.75777	1.59535	1.83898	1.55225	1.85423	1.77279
																																								117.332	2.09959	1.56212	2.17801	2.21447	1.44357	1.76346	1.50396	1.90334	1.83356
																																								117.999	1.29988	1.8316	2.46866	1.82979	1.68157	1.60855	1.75525	1.80799	1.78541
																																								118.665	1.70744	1.83697	2.1379	2.22887	1.5565	1.65674	1.49468	1.95382	1.82161
																																								119.332	1.73332	1.6086	2.13335	1.76047	1.55395	1.52491	1.46467	1.80276	1.69775
[truncated: 11 more columns]

## Sheet: Fig 3-Sup Fig 1
	Figure 3-Supplement Figure 1b
	Fiber volley intervals (mV)
	Control+EGFP																										Bcl11b cKO+EGFP
	0 - 0.25		0.25 - 0.50		0.50 - 0.75		0.75 - 1.00		1.00 - 1.25		1.25 - 1.50		1.50 - 1.75		1.75 - 2.00		2.00 - 2.25		2.25 - 2.50		2.5 - 3.0		3.0 - 3.5		3.5 - 4.0		0 - 0.25		0.25 - 0.50		0.50 - 0.75		0.75 - 1.00		1.00 - 1.25		1.25 - 1.50		1.50 - 1.75		1.75 - 2.00		2.00 - 2.25		2.25 - 2.50		2.5 - 3.0		3.0 - 3.5
	FV (mV)	Slope (mV/s)	FV (mV)	Slope (mV/s)	FV (mV)	Slope (mV/s)	FV (mV)	Slope (mV/s)	FV (mV)	Slope (mV/s)	FV (mV)	Slope (mV/s)	FV (mV)	Slope (mV/s)	FV (mV)	Slope (mV/s)	FV (mV)	Slope (mV/s)	FV (mV)	Slope (mV/s)	FV (mV)	Slope (mV/s)	FV (mV)	Slope (mV/s)	FV (mV)	Slope (mV/s)	FV (mV)	Slope (mV/s)	FV (mV)	Slope (mV/s)	FV (mV)	Slope (mV/s)	FV (mV)	Slope (mV/s)	FV (mV)	Slope (mV/s)	FV (mV)	Slope (mV/s)	FV (mV)	Slope (mV/s)	FV (mV)	Slope (mV/s)	FV (mV)	Slope (mV/s)	FV (mV)	Slope (mV/s)	FV (mV)	Slope (mV/s)	FV (mV)
	-0.1305	115.6	-0.262	267.75	-0.577	769.6	-0.9075	1254.9	-1.0285	1326.1	-1.312	1626.75	-1.714	2265.45	-1.905	5800.5	-2.0275	2761.7	-2.359	2935.5	-2.82	7448.4	-3.15	8167.5	-3.6	9637.5	-0.06	90.7	-0.2535	529.8	-0.5825	1620.15	-0.933	878.25	-1.149	873	-1.251	1063.2	-1.5405	2348.6	-1.829	2562.85	-2.2395	3022.7	-2.2615	3079.05	-2.6415	3742.9	-3.0435
	-0.173	195.9	-0.283	447.15	-0.6505	881.35	-0.7605	2070.7	-1.144	1476.3	-1.328	4109.35	-1.7355	3584.9	-1.9195	4245.65	-2.09	4275.05	-2.395	7522.95	-2.991	5334.5	-3.077	5355.8	-3.503	4518.8	-0.1105	124.65	-0.304	721.6	-0.684	1720.1	-0.806	1940.3	-1.12	2353.3	-1.328	2512.2	-1.609	2352.25	-1.7925	2793.55	-2.064	2979.4	-2.447	2511.65	-2.7815	3432.9	-3.323
	-0.1015	175.25	-0.3775	567.45	-0.7345	1046.3	-0.7665	2188.7	-1.2125	1594.6	-1.38	5422.9	-1.59	3784.95	-1.844	3844.35	-2.1125	4737.1	-2.446	5550.4	-2.92	4893.2	-3.08	8944.4	-3.64	5999.8	-0.1515	166.4	-0.3905	1026.85	-0.741	2108.5	-0.9935	2243.6	-1.108	1558.45	-1.3535	1975.65	-1.597	2422.85	-1.873	3421	-2.214	5852.25	-2.494	4176.2	-2.968	3895.7	-3.136
	-0.148	354.7	-0.367	489	-0.5015	1398.55	-0.883	2864.15	-1.187	2001.5	-1.4145	3288.3	-1.7255	3381.6	-1.898	3899.55	-2.172	4988.6	-2.43	4117.5	-2.53	7684.9	-3.388	4518.8	-3.633	7415.8	-0.159	255.7	-0.465	1210.4	-0.5085	619.05	-0.857	1308.5	-1.1975	1512.65	-1.3195	1739.85	-1.5125	2953	-1.997	1951.95	-2.235	6463.1	-2.345	3741	-2.6585	2998.5	-3.26
	-0.176	472.9	-0.461	722.95	-0.7315	1616.9	-0.901	2923.75	-1.147	3798.25	-1.2765	3328.55	-1.542	4865.7	-1.812	4520.9	-2.1375	4646.65	-2.305	7512.45	-2.54	3918.5	-3.118	5202.7			-0.168	403.9	-0.3	400.35	-0.5605	771.4	-0.82	1025.4	-1.029	2467.2	-1.4105	2054.2	-1.661	3233.3	-1.844	5556.8	-2.079	3944.55	-2.45	7113.5	-2.962	3285.5	-3.028
	-0.2005	592.75	-0.262	722.7	-0.6905	1608.55	-0.936	3274.8	-1.013	2755.4	-1.346	2636.55	-1.74	5680.55	-1.751	1439.3	-2.033	3566.85	-2.315	3545.3	-2.81	4568.3	-3.05	5525.05			-0.225	427.35	-0.3465	572.5	-0.748	909.55	-0.985	1277.35	-1.053	1173.35	-1.292	2641.55	-1.6385	1918.2	-1.984	5945.3	-2.072	4380.2	-2.396	3258.5	-2.7505	3832.65	-3.1405
	-0.065	169.6	-0.3075	968.75	-0.6175	2016.6	-0.765	2253.6	-1.0445	2850	-1.3595	2620.6	-1.522	4058.55	-1.84	3187.2	-2.015	6956	-2.2545	4702.35	-2.516	2105	-3.12	7823			-0.2465	586.55	-0.386	493.45	-0.5395	1766.7	-0.8245	1081.85	-1.21	1323.1	-1.4165	1460.65	-1.671	4541.65	-1.801	3147.9	-2.163	4784.9	-2.2975	3505.3	-2.627	4070	-3.484
	-0.105	292.5	-0.344	1114.2	-0.6735	2447.05	-0.8075	2298.25	-1.139	3105.4	-1.3875	3542.1	-1.5	2233.4	-1.99	3736.95	-2.124	1814.9	-2.396	5329.4	-2.588	1859.5	-3.1135	6076.8			-0.123	173.25	-0.496	608.55	-0.6595	1787.35	-0.787	2376.15	-1.0485	3097.25	-1.259	3467.25	-1.631	3010.6	-1.84	2506.85	-2.136	2943.85	-2.284	4493.7	-2.761	6875.8	-3.348
	-0.15	320.3	-0.401	1236.45	-0.504	1377.7	-0.7555	1784.6	-1.209	2759.8	-1.399	1282	-1.66	2104.8	-1.863	3048.4	-2.173	3529.35	-2.377	4699.9	-2.52	3898.7	-3.329	6515.5			-0.108	167.7	-0.2905	822.15	-0.5745	1458.55	-0.7925	2263.2	-1.0395	1946.75	-1.479	3995.2	-1.618	4976.55	-1.834	5384.2	-2.0905	6272.95	-2.3635	6728.9	-2.645	3661.6	-3.166
	-0.149	413.8	-0.443	1310.1	-0.537	1534.3	-0.8125	1757.8	-1.176	3855.6	-1.2865	1901.5	-1.57	2776.3	-1.822	3374.9	-2.004	4148.8	-2.289	3994.2	-2.718	5517.5					-0.1725	254.3	-0.3655	850.4	-0.682	1668.9	-0.8965	2448.7	-1.0485	1630.5	-1.281	2356.1	-1.734	4870.05	-1.845	5347.5	-2.0295	5864.35	-2.401	9219.75	-2.9865	4718.9	-3.343
	-0.177	502	-0.335	728.85	-0.646	1649.55	-0.9835	1777.05	-1.052	2249.9	-1.325	2500.45	-1.5585	3517.25	-1.978	2494.8	-2.1995	3275.95			-2.767	4111.6					-0.25	293	-0.4055	1152.35	-0.631	1531.9	-0.836	2773.4	-1.2275	2020.3	-1.332	2342.6	-1.6335	4369.6	-1.764	3514.45	-2.094	4168.4	-2.431	4143.8	-2.524	7295.25	-3.444
	-0.1875	638.95	-0.4975	1305.4	-0.721	1990.15	-0.946	2060.5	-1.1375	2243.05	-1.447	2563.8	-1.545	1773.8	-1.972	5074.2	-2.01	5392.05			-2.899	3860					-0.1055	232.15	-0.47	1358.1	-0.672	1764.95	-0.948	3161.4	-1.0205	1651.95	-1.406	1869.1	-1.725	2837.05	-1.7595	2600.35	-2.1405	3877.25			-2.852	7838.3
	-0.223	616.85	-0.2515	824.05	-0.557	1221	-0.834	2301.45	-1.0635	3047.55	-1.3905	2722.35	-1.58	3387.35	-1.9525	5263.15	-2.036	3518.7			-2.6315	4954.6					-0.1415	298.7	-0.281	651.6	-0.5855	858.35	-0.996	3403.1	-1.145	1869.9	-1.321	4089.3	-1.68	3285.3	-1.783	3496.4	-2.057	6928			-2.98	8162.4
	-0.239	745.7	-0.326	983.05	-0.582	1392.5	-0.88	2529.55	-1.128	1761.9	-1.4015	2409.45	-1.566	4750.3	-1.774	3474.8	-2.1925	4537.7			-2.908	4821.8					-0.1705	441.8	-0.3915	958.8	-0.6835	1163.75	-0.802	1508.85	-1.2	2044.1	-1.4295	3971.8	-1.552	5016.2	-1.9455	7099.25	-2.221	6906.6			-2.6175	5115.05
	-0.1765	321.2	-0.433	1355.75	-0.672	1519.1	-0.761	2102.75	-1.036	978.55	-1.4215	2985.85	-1.675	3119.65	-1.838	3536.8	-2.2	4168.65			-2.604	4012.5					-0.2135	466	-0.4335	1091.6	-0.5035	847.6	-0.8825	1730.5	-1.079	1462.85	-1.434	3291.6	-1.635	3139.9	-1.94	3625.8	-2.048	3278.9			-2.9045	12127.8
	-0.2255	570.35	-0.466	1583.6	-0.546	1265.45	-0.8505	2438.8	-1.187	1704.1	-1.316	2708.15	-1.685	3516.2							-2.9105	5027.25					-0.216	555.1	-0.4875	1301.9	-0.6325	1389.25	-0.991	1993.25	-1.2055	3805.6	-1.357	2028.55	-1.5815	2655.6	-1.7505	5911.75	-2.038	3108.2			-2.605	4418.6
	-0.1045	287.85	-0.376	854.45	-0.6155	1316.55	-0.769	1922.85	-1.027	2699.6	-1.346	2126.85	-1.5885	3303.55							-2.595	6013.35					-0.201	586.7	-0.253	578.4	-0.5865	591.15	-0.907	1562.05	-1.0375	2908.65	-1.3005	4235.15			-1.839	6215.4					-2.6435	2007.95
	-0.1915	389.15	-0.421	1112.05	-0.503	1293.35	-0.9875	2133.6	-1.0125	1730.65	-1.275	3268.55	-1.723	3410.75							-2.83	7334.9					-0.237	772.15	-0.279	892.3	-0.6185	833.75	-0.7765	1164.95	-1.207	3412.8	-1.442	1962.95			-1.8875	1796					-2.975	2169.7
	-0.222	550.95	-0.253	694.55	-0.6595	1519.45	-0.805	2659.2	-1.095	2329.8	-1.483	3747.95									-2.5175	5227.3					-0.0925	140.15	-0.3835	1141.35	-0.537	1678.65	-0.805	1422.45	-1.0305	1856.2	-1.4345	3405.9			-1.9275	3003.7
	-0.089	90.4	-0.4065	987.55	-0.703	1966.35	-0.86	1588.95	-1.198	2684.75	-1.289	2677.8															-0.092	174	-0.4795	1192.2	-0.589	1924.85	-0.85	1130.5	-1.2315	2684.85	-1.4315	4343.1
	-0.127	256.15	-0.4465	1053.2	-0.503	1540.75	-0.903	1566.95	-1.1395	2398.75	-1.396	2942.6															-0.127	252.5	-0.345	522.5	-0.6045	1802.75	-0.8645	3031.85	-1.0555	3197.75	-1.3305	2329.2
	-0.1655	474.35	-0.4795	1208.35	-0.591	1742.55	-0.7865	2537.3	-1.1975	1503.2	-1.2665	2813.45															-0.138	275.55	-0.4935	714.1	-0.5575	2003.15	-0.9585	3387.35	-1.018	1627.7	-1.4255	2798.05
	-0.2095	544.95	-0.2605	883.3	-0.6955	1840.9	-0.7765	1328.5	-1.077	2373.25	-1.4965	3190.8															-0.146	285.5	-0.255	560	-0.664	2317.15	-0.9455	2629.2	-1.1355	2766.3	-1.2535	3720.5
	-0.2065	506.15	-0.286	781.25	-0.5405	1215.8	-0.865	1404.1	-1.237	4122.1	-1.255	2565.25															-0.183	378	-0.283	661.15	-0.5115	1232.8	-0.8125	1600.95	-1.071	3473.75	-1.381	4701.65
	-0.135	193.15	-0.397	990.3	-0.6825	1628.25	-0.795	815.65	-1.057	1658.2	-1.273	2456.9															-0.2335	508.65	-0.3185	653.85	-0.5275	1321.25	-0.7795	1255.7	-1.164	1992.15	-1.4945	5027.75
	-0.2325	511.7	-0.4	994.65	-0.6915	1423.1	-0.932	1340.5	-1.041	2227.35	-1.355	2829.4															-0.2135	493.55	-0.3575	741.55	-0.6085	1353.85	-0.826	2606.05	-1.0145	2875.35	-1.322	1503.85
	-0.093	185.45	-0.473	1094.9	-0.5065	1197.65	-0.7565	1826.2	-1.065	2036.2	-1.48	2772.45															-0.099	273.8	-0.3615	893.3	-0.549	1074.65	-0.857	1339.2	-1.1415	3505.65	-1.4705	2558.75
	-0.187	403.85	-0.3475	978.75	-0.7115	1606.65	-0.778	2032.1	-1.221	2354.35	-1.3635	3602.2															-0.105	304.6	-0.413	1001.85	-0.709	1319	-0.7505	1758.25	-1.0845	2101.15
	-0.1705	629.85	-0.289	849.5	-0.55	2015.25	-0.844	1915	-1.248	2447.5	-1.359	3835.95															-0.1085	391.15	-0.3795	409.25	-0.584	870.45	-0.806	2481.25	-1.1825	4049.65
	-0.1225	265.85	-0.3005	956.45	-0.564	989.6	-0.8695	1665.35	-1.201	2409																	-0.155	461.95	-0.488	499.3	-0.572	926.15	-0.8725	2647.1	-1.122	1826.45
	-0.248	542.45	-0.4	1360.55	-0.728	1053.2	-0.987	2259.05	-1.1075	2419.95																	-0.1695	546.35	-0.3965	1203.65	-0.64	1054	-0.8215	1343.05
	-0.157	318.35	-0.3295	814.5	-0.584	753.75	-0.8715	1923.85	-1.153	2154.25																	-0.238	808.35	-0.2785	1006.95	-0.515	1576.45	-0.9235	1717.95
	-0.177	465.7	-0.402	914.05	-0.6575	703.6	-0.929	1809.45	-1.1345	2312.05																	-0.103	113.4	-0.2785	908.8	-0.5935	2012.05	-0.821	2477.7
	-0.2385	764.35	-0.4795	1832	-0.643	1540.5	-0.924	1973.65	-1.0615	1824.4																	-0.165	245.85	-0.2605	974.55	-0.7045	2561.95	-0.915	3098.45
	-0.1295	273.35	-0.4045	941.15	-0.671	1831.8	-0.846	1447.3	-1.2105	2225.35																	-0.2475	344.8	-0.296	1207	-0.5015	1954.15	-0.79	929.9
	-0.1975	310.5	-0.302	770.25	-0.553	825.55	-0.898	1705.7	-1.1755	2462.95																	-0.2095	360.35	-0.4095	1493.05	-0.5475	2120.55	-0.946	942.7
	-0.2175	304.15	-0.337	983.75	-0.6075	877.75	-0.817	1174.85	-1.148	3155.45																	-0.115	225.8	-0.334	462.55	-0.558	1467.05	-0.8925	1464.05
	-0.2045	345.7	-0.4655	1412.6	-0.5395	1590.35	-0.822	1275.8	-1.2475	3026.25																	-0.247	533.45	-0.321	647.05	-0.7005	1924.1	-0.751	1146.4
	-0.21	155.45	-0.2875	496.4	-0.6035	1243.15	-0.8595	1850.95	-1.219	3003.1																	-0.166	513.65	-0.3005	378.05	-0.5945	1055.95
	-0.1435	333.75	-0.274	458.25	-0.61	1159.85	-0.9625	2261.25	-1.172	3079.3																	-0.166	584.5	-0.351	499.5	-0.6705	1434.65
	-0.132	297.2	-0.3335	615.85	-0.6965	1289.3	-0.977	2778.85																			-0.2255	737.7	-0.4445	657.3	-0.5045	900.8
	-0.18	580.55	-0.4215	750.7	-0.734	1456.3	-0.76	1404.05																			-0.1205	135.65	-0.309	458.6	-0.57	1058.55
	-0.2155	404.75	-0.253	283.45	-0.5335	1122.35	-0.8465	1467.75																			-0.1365	200.25	-0.404	673.55	-0.524	1274.5
	-0.198	651.2	-0.319	281.15	-0.615	1328.3	-0.781	2085.1																			-0.206	277.7	-0.488	758.85	-0.555	1626.15
	-0.25	625.35	-0.396	364	-0.701	1558.25	-0.992	2472.3																			-0.234	324.3	-0.338	1212.2	-0.6735	1863.2
	-0.1855	353.95	-0.493	449.8	-0.504	1053.3	-0.933	1559.55																			-0.248	345.85	-0.271	1240.15	-0.7305	2008.6
	-0.165	398.65	-0.303	817	-0.7245	1525.9	-0.785	1726.4																			-0.093	202.7	-0.322	1312.8	-0.626	1004.2
	-0.2035	341.65	-0.364	1075.05	-0.5385	869.1	-0.7515	1708.7																			-0.239	865.6	-0.3775	1539.4	-0.592	1575.5
	-0.2455	540.55	-0.2755	436.2	-0.5985	870.75	-0.887	1870.6																			-0.2115	796.05	-0.256	600.1	-0.549	1757.8
	-0.2375	637.15	-0.2645	674.6	-0.739	1061.15	-0.836	1817.15																			-0.1485	337.4	-0.3645	1070.9	-0.606	2007.2
	-0.1345	187.15	-0.39	674.05	-0.521	1166.25	-0.8255	1275.15																			-0.1825	366.05	-0.422	1136.5	-0.7105	2277.95
	-0.1585	263.9	-0.3945	769	-0.7285	1454.55	-0.9345	2316.95																			-0.18	256.5	-0.467	1390.9	-0.737	2302.35
	-0.209	411.45	-0.296	739.15	-0.672	1941.05	-0.8015	2017.5																			-0.2455	426	-0.3055	544.35	-0.669	1143.9
	-0.244	537.85	-0.2715	818.7	-0.577	1080.9																					-0.1035	193.75	-0.398	718	-0.5595	1647.05
	-0.227	460.95	-0.437	1277.05	-0.579	1777.4																					-0.177	267.2	-0.299	508.1	-0.5935	1276.85
	-0.1705	284.25	-0.351	661.7	-0.5295	974.7																					-0.2405	377.7	-0.279	492.4	-0.526	2058.85
	-0.181	286.05	-0.457	875.05	-0.535	1278.7																					-0.159	378.6	-0.3645	739.6	-0.5865	2234.6
	-0.242	374	-0.2915	515.85	-0.57	1113.3																					-0.227	512.7	-0.438	753.7	-0.691	2645.8
	-0.216	473.05	-0.3825	809	-0.6055	1406.7																					-0.243	512.35	-0.326	797.95	-0.5655	463.75
	-0.25	529.2	-0.3945	868	-0.6415	1623.35																					-0.171	345.05	-0.405	916.65	-0.644	632.95
	-0.2405	443.6	-0.2525	441.8	-0.6685	1640.85																					-0.2195	502.45	-0.453	871.95	-0.7025	679.25
	-0.1875	492.8	-0.394	706.7	-0.6495	1019.55																					-0.188	376.5	-0.305	818.8	-0.614	1004.45
	-0.1915	785.4	-0.456	982.15	-0.5015	1027.85																					-0.12	326.6	-0.348	717.5	-0.6095	1231.4
	-0.1755	454.7	-0.3985	838.2	-0.72	1456.7																					-0.142	314.3	-0.409	1245.2	-0.501	804.1
	-0.147	178.1	-0.317	643.85	-0.581	1724.95																					-0.218	579.25	-0.4945	1165.1	-0.714	1196.6
	-0.162	264.4	-0.4495	673.1	-0.6965	1788.85																					-0.229	693.8	-0.324	1062.95	-0.54	882.9
	-0.2015	357.6	-0.302	445.65	-0.6775	2494																					-0.156	439.35	-0.455	1594
	-0.121	219.45	-0.4495	721.65																							-0.1305	318.1	-0.371	617.65
	-0.1285	231.95	-0.3575	795.6																							-0.203	424.8	-0.348	934.8
	-0.1065	261.1	-0.308	1127.85																							-0.242	375.9	-0.2885	697
	-0.1615	347.85	-0.286	562.4																							-0.115	283.3	-0.3425	856.8
	-0.128	122.5	-0.421	1016.8																							-0.132	309.1	-0.2695	914.5
	-0.135	187.3	-0.338	749.65																							-0.1805	421.95	-0.3905	1264.85
	-0.1485	226.6	-0.4485	982.6																							-0.184	489.95	-0.4445	1658.05
	-0.2225	297.65	-0.264	344.15																							-0.207	558.25	-0.361	296.4
	-0.158	258.9	-0.3545	410.5																									-0.3045	620.6
	-0.18	413.05	-0.407	594.75																									-0.3715	723.75
	-0.234	494.1	-0.255	541.8																									-0.424	935.75
	-0.212	649.9	-0.262	610.1																									-0.2905	433.3
			-0.319	765.2																									-0.3795	553.6
			-0.3565	980.15																									-0.428	717.5
			-0.316	633.45																									-0.265	634.5
			-0.389	855.9																									-0.2615	741.95
			-0.497	1063.6																									-0.334	815.8
			-0.262	481.85																									-0.368	833.2
			-0.336	935.6																									-0.472	1054.65
			-0.4735	1348.2																									-0.376	990.8
			-0.29	356.4																									-0.373	949.2
			-0.381	480																									-0.499	1025
			-0.378	555.25																									-0.415	833.9
			-0.492	695.35
			-0.318	659.4
			-0.421	988.85
			-0.4945	1033.3
			-0.413	1263.9
			-0.48	1400.45
Mean	-0.17838	391.49	-0.365208	828.036	-0.619306	1398.73	-0.854802	1939.61	-1.13375	2403.64	-1.3596	2913.06	-1.62333	3417.5	-1.87727	3796.1	-2.10177	4154.54	-2.35665	4990.99	-2.71661	4873.25	-3.15839	6458.84	-3.594	6892.97	-0.17382	383.796	-0.364733	856.597	-0.60797	1453.88	-0.863737	1909.23	-1.11253	2302.29	-1.36872	2868.36	-1.62622	3370.67	-1.85453	3993.74	-2.12006	4673.47	-2.37914	4724.67	-2.77128	4980.53	-3.24691
SEM	0.00504158	18.5551	0.00755249	31.5864	0.00919529	47.221	0.0100311	67.9223	0.0114459	109.061	0.0125553	148.21	0.0194171	237.484	0.0193508	285.131	0.0194622	309.721	0.0200599	488.031	0.0380354	357.586	0.0393589	507.416	0.0315621	1089.35	0.0058893	20.0831	0.00746319	32.0938	0.00859334	65.2519	0.0117068	122.961	0.0131782	153.116	0.0140133	210.364	0.0153828	259.593	0.0171849	372.881	0.0184619	371.589	0.0228108	623.993	0.0373318	602.976	0.0467038
	FV (mV)	Slope (mV/s)	FV (mV)	Slope (mV/s)	FV (mV)	Slope (mV/s)	FV (mV)	Slope (mV/s)	FV (mV)	Slope (mV/s)	FV (mV)	Slope (mV/s)	FV (mV)	Slope (mV/s)	FV (mV)	Slope (mV/s)	FV (mV)	Slope (mV/s)	FV (mV)	Slope (mV/s)	FV (mV)	Slope (mV/s)	FV (mV)	Slope (mV/s)	FV (mV)	Slope (mV/s)	FV (mV)	Slope (mV/s)	FV (mV)	Slope (mV/s)	FV (mV)	Slope (mV/s)	FV (mV)	Slope (mV/s)	FV (mV)	Slope (mV/s)	FV (mV)	Slope (mV/s)	FV (mV)	Slope (mV/s)	FV (mV)	Slope (mV/s)	FV (mV)	Slope (mV/s)	FV (mV)	Slope (mV/s)	FV (mV)	Slope (mV/s)	FV (mV)
[truncated: 43 more columns]
