# Supplementary material for: Regulation of hippocampal mossy fiber-CA3 synapse function by a Bcl11b/C1ql2/Nrxn3(25b+) pathway
Source: eLife. 2024 Feb 15;12:RP89854. doi: 10.7554/eLife.89854 (PMC10942602; doi:10.7554/eLife.89854)
Supplement: Figure 4—source data 1. [file elife-89854-fig4-data1.xlsx]

## Sheet: Figure 4
Figure 4b					Figure 4e & Supplement Figure 1c											Figure 4f & Supplement Figure 1d-e									Figure 4h
	Relative C1ql2 mRNA levels					Average synapse score											Number of docked vesicles per 100nm of AZ profile length									fEPSP slope (% of baseline)
	+shNS-EGFP	+shC1ql2-EGFP				+shNS-EGFP				+shC1ql2-EGFP							+shNS-EGFP			+shC1ql2-EGFP						+shNS-EGFP								+shC1ql2-EGFP
animal #1	0.88608	0.392884				animal #1	animal #2	animal #3	animal #4	animal #1	animal #2	animal #3	animal #4				animal #1	animal #2	animal #3	animal #1	animal #2	animal #3			Time (min)	slice #1	slice #2	slice #3	slice #4	slice #5	slice #6	Mean	SEM	slice #1	slice #2	slice #3	slice #4	slice #5	slice #6	slice #7	Mean	SEM
animal #2	1.18005	0.132327				3	5	1	5	5	5	0	1				0.879391	0	0.703284	0	0	0			-10	0.996031	0.930543	1.16147	0.948827	0.731505	1.10941	0.979631	0.0619413	1.01265	0.926302	0.917495	1.14202	1.10347	0.969569	1.02842	1.01428	0.0322127
animal #3	0.892244	0.152708				1	5	4	5	4	1	0	5				1.17897	0.905387	0	0	0.643832	1.46306			-9.66667	0.944361	0.928511	0.828107	0.858758	0.732692	1.05224	0.890778	0.044836	1.07087	1.04233	1.12568	1.10077	1.04578	1.08584	0.969535	1.06297	0.019147
animal #4	1.04163	0.230927				3	0	5	5	0	5	4	3				0	0	0.424701	0	1.46563	0			-9.33333	1.0989	0.980494	0.795795	1.00628	1.13716	0.96665	0.997546	0.0489178	1.02737	0.910271	1.00875	1.0814	0.976667	1.10886	0.868523	0.997405	0.0327824
Mean	1	0.227211				5	1	5	0	5	1	1	1				1.11744	0.951656	1.20185	0.409769	0.554139	1.59821			-9	0.984483	0.862906	1.2252	0.849751	0.76048	1.05428	0.956183	0.0685858	1.07598	0.846583	1.04014	0.935282	0.859481	1.12385	1.12282	1.00059	0.0450593
SEM	0.0699635	0.0591715				5	1	0	0	5	0	1	5				0.490124	0.785916	0.859697	0	0	1.13861			-8.66667	0.968172	0.927794	1.21245	1.05722	1.09678	0.959163	1.03693	0.043775	1.05722	0.990534	1.08793	0.879275	0.866813	0.973051	0.938217	0.970434	0.0315596
						5	1	4	5	1	0	1	5				0	0	0	0.530181	0.66921	0			-8.33334	0.899833	0.951575	1.14729	1.19543	1.21506	0.926833	1.056	0.0591747	1.04997	1.04321	0.946218	0.92952	0.925947	1.038	0.882859	0.973674	0.0258302
						0	3	5	5	1	3	0	0				0	1.26871	0.750554	0	0	0			-8	0.898762	1.05255	0.917147	0.940441	0.927443	1.23226	0.994768	0.0524304	1.00071	1.03688	0.858777	1.02171	1.19037	0.909917	1.08643	1.01497	0.0414128
						3	5	5	5	0	4	5	5				0.327826	0.744823	0.921319	0.733972	0	0			-7.66667	0.992222	0.860994	0.979619	1.24015	1.06472	0.975838	1.01892	0.0516705	0.970431	1.11965	0.99731	1.1139	1.20311	1.09175	0.857937	1.05058	0.0436743
						5	3	5	5	1	5	5	5				1.17834	0	0	0	0.309598	0			-7.33334	0.931264	0.79993	0.944613	0.91311	1.11863	0.919857	0.937901	0.0419241	0.994101	0.943968	1.14169	0.846778	0.981234	0.965935	1.02997	0.986239	0.0337399
						5	3	3	5	0	1	5	5				1.46413	0	0.558659	2.51572	0	0.488424			-7	0.946147	0.789294	0.951076	0.897581	1.18228	0.950655	0.952839	0.0524396	0.983439	0.856616	1.00265	1.05075	0.96609	0.968812	0.939099	0.966779	0.0226369
						5	3	5	5	1	5	5	1				0	0.786658	0.791703	0	1.21197	0			-6.66667	0.936979	0.855975	0.950896	1.08921	1.02791	0.880381	0.956891	0.0360655	0.960409	0.966433	1.15529	1.10353	0.871981	0.971537	1.05511	1.01204	0.0367579
						5	2	5	1	0	5	5	5				0.944332	0	1.34947	0	0	0			-6.33334	1.10259	0.845818	1.07566	0.891058	1.04453	0.969712	0.988228	0.0424099	0.957211	1.10024	0.979517	1.01895	1.02619	1.05678	0.788023	0.989557	0.0380282
						3	2	0	3	4	0	1	5				0.390396	0.823859	0	0	0	1.33209			-6	0.974244	0.7832	1.07889	1.00784	0.907018	1.03386	0.964175	0.0432214	0.972564	1.15008	0.985744	0.948188	1.0459	0.941257	0.992031	1.00511	0.0274306
						1	5	5	0	5	0	3	3				0	0.797257	0	0	0	0.935716			-5.66667	1.00591	0.976789	0.84552	1.16002	0.934806	1.01412	0.989529	0.0423621	0.90241	1.16338	0.896778	1.0224	1.00359	1.10083	0.847571	0.990995	0.0437041
						5	1	3	5	5	1	3	5				0	0.595327	0.335492	0.468516	0.507434	0			-5.33334	1.00615	0.848925	0.968668	0.926154	0.980406	0.912881	0.940531	0.0231306	1.05189	0.906345	1.15885	0.787545	0.950706	1.05511	1.02754	0.99114	0.0456459
						5	3	3	5	5	0	3	5				0.806094	0.818063	0	0.786287	0.383789	0.838539			-5.00001	1.12342	0.956355	1.08482	0.925222	0.74718	0.863196	0.950032	0.057031	1.06852	1.0492	0.864242	0.970084	1.06176	0.949584	0.920573	0.983424	0.0297541
						1	5	5	5	5	5	1	5				0.495983	0.427689	0	0	0	0.681361			-4.66667	0.996389	1.28343	1.37294	0.673651	1.04263	1.09376	1.07713	0.10014	1.00711	1.15466	1.02629	0.961787	0.945898	0.809538	1.02622	0.990213	0.0394428
						5	5	5	1	4	3	5	0				1.5647	1.20504	0.97012	0	0	0.870777			-4.33334	0.984007	1.04514	0.88663	0.761856	0.791117	0.777267	0.874337	0.0484263	1.03803	1.0443	0.91813	0.959712	0.971499	0.907797	0.920573	0.965719	0.0213421
						5	3	0	0	0	5	3	3				0	0.790576	0	0.93301	0	0			-4.00001	1.10378	0.96938	0.798846	1.07492	1.06282	0.989791	0.999923	0.0453997	0.97363	0.874392	0.991209	0.946345	0.895058	1.01438	0.965565	0.951512	0.019134
						3	5	5	1	1	0	5	1				0	0.453227	0	0.595699	0	0			-3.66667	0.956147	1.06175	1.14406	1.08735	0.934331	0.915603	1.01654	0.0382587	1.01201	0.916378	1.03429	0.967318	0.940129	0.925208	1.00923	0.972082	0.0177206
						3	5	5	5	3	5	4	5				0	0.917431	1.1961	0.547285	0	0			-3.33334	1.05294	1.12055	1.01606	1.05442	1.14951	0.832738	1.0377	0.0455903	0.896226	0.889878	1.20791	1.03784	0.979552	0.888569	1.34204	1.03457	0.0670844
						1	5	3	5	3	5	0	0				0.608569	0	1.0853	0	0.499825	0			-3.00001	0.992222	1.0547	1.13382	0.98299	0.980644	0.861154	1.00092	0.0369228	1.12631	1.15891	0.930839	0.758044	0.919817	0.989553	0.848453	0.961704	0.0542857
						1	5	5	0	5	1	3	5				0	1.00412	0.938967	0	0	1.09123			-2.66667	0.972934	1.29119	0.947486	1.00194	0.927206	1.1739	1.05244	0.0598124	1.0408	0.98061	0.961215	0.975154	0.905875	0.783497	0.942187	0.941334	0.0305292
						0	5	3	5	5	5	0	5				1.19062	0.701508	0	0	0	0			-2.33334	0.987578	1.30589	0.976567	1.12399	0.939556	1.06517	1.06646	0.0550898	0.998578	1.07461	0.851151	0.909007	1.00924	0.990159	1.02136	0.979159	0.0282856
						1	5	3	5	0	1	0	0				1.07198	0	0	0	1.85908	0			-2.00001	1.10985	0.921222	1.00134	0.868696	1.33523	1.0975	1.05564	0.0680264	0.960623	0.900129	1.0423	0.995667	1.21537	0.899621	1.05577	1.00993	0.0414648
						3	5	0	5	5	5	0	5				0	0	0.370178	0.199314	0	0			-1.66668	0.969601	1.13309	0.926841	1.21841	1.03408	1.06126	1.05721	0.0435764	1.01116	0.912343	0.99642	1.21969	0.981835	1.04633	1.09856	1.03805	0.0372066
						5	5	3	1	5	5	1	0				0	0	0.651339	0	0	0.922679			-1.33334	1.0914	1.13106	0.946947	0.977089	1.18157	1.13	1.07634	0.0381956	0.996659	1.06676	0.892584	1.03761	0.931235	1.1184	0.956302	0.999936	0.0301097
						5	0	5	1	0	5	1	5				1.34084	1.05435	0.612745	0.626488	0	0.385446			-1.00001	0.982935	1.07072	0.765456	1.11654	1.15497	1.06194	1.02543	0.0571131	0.922667	0.966651	0.962867	0.99705	0.966932	1.13702	1.17663	1.01855	0.0368841
						5	0	5	5	3	5	1	5				0.967539	0.757174	1.03295	0.602845	0	0.459601			-0.666676	0.984483	1.06653	1.02037	1.05473	1.07279	0.989621	1.03142	0.0158753	1.01287	0.958472	1.03645	1.03554	1.09109	1.14686	1.19229	1.06765	0.0305831
						5	5	3	5	5	5	0	0				0.521567	0	0.678887	0.529493	0	0			-0.333343	1.00627	1.19368	0.895426	1.09635	0.784942	1.12898	1.01761	0.0629274	0.847608	1.04986	0.981296	1.24712	1.16741	1.0324	1.09018	1.05941	0.0487041
						5	5	1	1	1	5	5	0				0	0	0	0	0	0			0	4.65799	3.99523	5.43718	6.24704	6.38166	5.01736	5.28941	0.377691	5.47438	5.33207	4.00182	6.70093	4.67108	5.60484	4.68226	5.20963	0.327043
						5	1	4	1	5	5	5	3				0.389105	0	0.655351	0.410172	0.391374	0			0.333333	3.49778	2.9477	4.1409	4.76215	3.82757	3.68164	3.80962	0.249927	4.20243	4.04763	2.76405	5.1966	3.54802	4.20969	3.33581	3.9006	0.2937
						3	4	0	5	0	5	1	3				1.18287	0.794786	0	0.965158	0.941176	0.401461			0.666666	2.6595	2.50949	3.06488	3.22104	2.86261	2.81589	2.85557	0.106022	3.58704	3.12537	2.7249	3.15156	2.83553	3.09932	2.53102	3.00782	0.130512
						5	5	5	0	0	1	5	3				0.732064	0.514801	0.578503	0	0	0.650407			0.999999	2.32638	1.94892	2.78447	2.98438	2.5529	2.5108	2.51798	0.147237	2.59485	2.74183	1.90553	2.59934	2.04456	2.60045	2.08507	2.36738	0.12885
						5	5	5	0	1	5	1	5				0	0	0	0.457059	0	0			1.33333	2.20339	2.05193	2.36692	2.70858	2.03349	2.09733	2.24361	0.105722	2.33002	2.4657	1.93832	2.55946	1.818	2.29008	2.11286	2.21635	0.102928
						0	5	1	0	5	1	0	1				0	0.661857	0.746603	0.898553	0	0.543478			1.66667	1.95516	1.86467	2.27321	2.53807	2.0323	2.22903	2.14874	0.100871	2.08863	2.28795	1.63609	2.13262	1.80742	2.32006	1.84578	2.01693	0.0978447
						5	5	4	3	5	5	0	5				0	0	0	0	0	0			2	1.80098	2.18792	2.34609	2.40017	1.98005	1.86405	2.09654	0.102924	2.13277	1.95708	2.00657	2.02959	1.71704	2.23361	1.65302	1.96138	0.0794308
						5	5	5	5	3	5	5	5				0	0	1.09667	0	0.45996	0.945805			2.33333	1.76395	2.05408	2.01417	2.17997	1.68602	1.91152	1.93495	0.0757754	1.8867	1.86754	1.79305	1.97727	1.65009	1.8863	1.8965	1.85107	0.0391979
						5	5	5	5	1	3	5	5				1.66237	0	0.607054	0	0.517947	0			2.66666	1.69454	2.18792	2.07862	2.46043	1.74967	1.88157	2.00879	0.118746	1.98372	1.967	2.00619	1.81594	1.75202	1.75731	1.7891	1.86732	0.0427971
						5	5	5	5	5	3	5	1				0	0	0.61393	0	0.919287	0.322977			3	1.76002	2.00831	2.21038	1.91846	2.00309	1.74613	1.94106	0.0712244	1.9398	2.05981	2.04025	1.65046	1.58062	1.91643	1.56744	1.82211	0.0815714
						5	3	5	1	1	5	5	5				0.600024	0	0	0.515544	0	0			3.33333	1.86658	1.99194	1.91705	1.80727	1.84752	1.8632	1.88226	0.0262543	1.80077	1.79786	2.01889	1.8247	1.68819	1.77986	1.72117	1.80449	0.040092
						1	1	4	5	5	5	5	5				2.42072	0.909422	0	0.757978	0	0			3.66666	1.75002	2.27766	1.82137	1.84423	1.86747	1.75123	1.88533	0.0808936	1.80546	1.86362	1.75822	2.37047	1.81307	1.79001	1.52245	1.84619	0.09681
						5	5	5	5	1	5	3	5				0	0.764935	0.37143	0.502892	0	1.04216			4	1.62953	1.84328	1.56771	1.99921	1.66227	1.79854	1.75009	0.0654728	1.87348	1.97867	1.93705	1.7899	1.49325	1.6274	1.51892	1.74552	0.0753285
						5	5	5	5	3	0	3	3				0.882145	0	0.724218	0	1.34084	0			4.33333	1.72585	2.09519	1.85243	2.28899	1.60836	1.94555	1.91939	0.101139	1.69692	1.67474	1.65286	1.61381	1.51067	1.70507	1.57891	1.63328	0.0265805
						5	5	1	3	5	5	5	1				0	0	1.074	0.883626	0.458842	0			4.66666	1.76157	2.13701	1.85368	1.83616	1.715	1.83087	1.85571	0.0602207	1.64596	1.91051	1.59415	1.58316	1.49685	1.47903	1.5648	1.61064	0.05446
						1	5	5	5	5	4	5	3				0	0.798594	0	0	0.80782	0.397725			5	1.8792	2.19126	1.6458	1.83833	1.61406	1.7303	1.81649	0.0861015	1.79608	1.77812	2.05537	1.68295	1.61524	1.69599	1.44879	1.72465	0.0703677
						1	5	0	0	4	1	3	1				0	0	0	0	0.846024	0			5.33333	1.75288	1.99074	1.84489	1.99487	1.85132	2.03999	1.91245	0.0458084	1.50394	1.87485	1.57305	2.04988	1.56596	1.60469	1.52466	1.671	0.0785963
						5	1	5	2	3	1	3	5				0.371209	0.767578	1.21305	0.174544	0	0			5.66666	1.50679	2.20226	1.4451	1.6936	1.76725	1.63672	1.70862	0.109953	1.55661	1.51007	1.65058	2.03075	1.50695	1.96533	1.75182	1.7103	0.0813696
						5	5	5	0	0	0	0	5				1.20861	0	1.01194	0	0	0.720669			5.99999	1.56322	1.56939	1.67309	1.78367	1.42928	1.8911	1.65163	0.0681321	1.65641	1.88586	1.68235	1.71983	1.60887	1.5408	1.84093	1.70501	0.0464153
						4	0	5	0	5	5	5	5				0.861215	0	0	0	0.514192	0.70927			6.33333	1.75288	1.81018	1.89264	1.78833	1.65087	1.76229	1.7762	0.0323025	1.57005	1.68673	1.59008	1.62003	1.4251	1.67873	1.58884	1.59422	0.03295
						0	5	5	2	5	5	5	4				0.652358	0	0.270981	0	0.625313	0.59891			6.66666	1.66144	1.99732	1.57992	1.74795	1.8271	1.76553	1.76321	0.0586166	1.54915	1.71007	1.6488	1.46792	1.54553	1.77441	1.61839	1.61632	0.0397576
						0	0	0	0	5	1	1	5				1.62602	0.750582	0	0.523725	0	0			6.99999	1.61203	2.0873	1.56502	1.46532	1.33785	1.64421	1.61862	0.104174	1.57644	1.51966	1.65477	1.44671	1.4144	1.52324	1.5831	1.53119	0.0312391
						5	0	5	5	5	5	3	5				0.885269	0.292201	0	0	0	0			7.33333	1.59644	1.84376	1.62462	1.8697	1.58912	1.52391	1.67459	0.0592456	1.70289	1.52751	1.95255	1.461	1.3662	1.75594	1.57781	1.62056	0.0749549
						3	1	5	1	1	5	5	0				0	0.435483	0.360127	0	0.54939	0			7.66666	1.66573	1.62687	1.72335	1.64639	1.6124	1.80075	1.67925	0.0289729	1.45682	1.61759	1.56631	1.52346	1.51752	1.51658	1.38615	1.51206	0.0281005
						5	3	5	0	3	0	5	0				1.35823	0.476508	0	0	1.0523	0			7.99999	1.62037	1.80863	1.81868	1.72808	1.87769	1.75328	1.76778	0.036449	1.40287	1.761	1.83143	1.40016	1.60058	1.5084	1.4457	1.56431	0.0657479
						5	5	1	1	0	5	5	5				1.41804	0	0	0	0	0.387837			8.33332	1.54703	1.5903	1.72838	1.74205	1.72925	1.82763	1.69411	0.0427963	1.50309	1.58826	1.49399	1.54812	1.4257	1.57562	1.35439	1.49845	0.0318386
						5	3	5	0	5	5	5	5				0	0.615044	0.540015	0	1.25188	0.46262			8.66666	1.46464	1.51418	1.68583	1.78615	2.05368	1.66956	1.69567	0.0863033	1.36961	1.57997	1.67409	1.71269	1.51957	1.69387	1.37138	1.56017	0.0552293
						5	0	4	0	3	5	3	5				0.908018	0	0	0.784498	0	0.607607			8.99999	1.56417	1.68303	1.49986	1.68956	1.75229	1.7805	1.66157	0.0444431	1.32227	1.54889	1.60978	1.51954	1.26717	1.57744	1.69602	1.50587	0.0587172
						0	3	3	3	3	0	3	5				1.25125	0	0	0.355593	0.208143	0.756172			9.33332	1.61322	2.27671	1.61618	1.46501	1.72189	1.71618	1.73487	0.114864	1.64575	1.65249	1.52056	1.45755	1.53543	1.65632	1.42916	1.55675	0.0361498
						0	5	5	3	1	0	3	1				1.43947	0	1.8797	0.966884	0	0.495614			9.66666	1.53524	1.74708	1.58872	1.50787	1.54851	1.62038	1.5913	0.0351448	1.43272	1.43449	1.48878	1.53568	1.44108	1.57986	1.50481	1.4882	0.0213334
						1	1	0	5	1	5	3	0				0	0.5978	1.57048	0	0	0.423621			9.99999	1.60727	1.67885	1.68637	1.54607	1.73115	1.82542	1.67919	0.0395925	1.54467	1.70582	1.4748	1.4073	1.44349	1.49129	1.49334	1.50867	0.0366357
						5	5	1	3	5	5	0	5				0	0	0	0	0.663394	0.857927			10.3333	1.47512	1.74756	1.34332	1.33457	1.69457	1.63315	1.53805	0.0731946	1.32525	1.42489	1.58512	1.26394	1.2751	1.51688	1.44261	1.40483	0.0462657
						5	5	1	3	3	5	5	1				0	0.933968	0.511509	0.718442	0	0			10.6667	1.68025	1.69187	1.46916	1.82808	1.55848	1.57887	1.63445	0.0513389	1.41161	1.32478	1.52259	1.36628	1.49685	1.54277	1.41901	1.44056	0.0310794
						3	5	0	5	1	5	1	3				0	0	0.879121	0.639632	0	0.860067			11	1.57215	1.99887	1.39466	1.71721	1.77817	1.56628	1.67122	0.085288	1.38197	1.39839	1.49705	1.74795	1.38964	1.4916	1.45563	1.48032	0.0481189
						3	0	3	5	5	5	5	3				0	0	0	0	0	0			11.3333	1.69252	1.7043	1.36468	1.33799	1.42596	1.58261	1.51801	0.0667638	1.37067	1.44998	1.42155	1.53038	1.34313	1.51734	1.31492	1.42114	0.0315982
						0	3	1	5	5	5	2	3				0.79466	1.74095	0	0.280183	0	0			11.6667	1.5475	1.80456	1.7194	1.53365	1.69386	1.56849	1.64458	0.0451445	1.43208	1.45183	1.39626	1.49557	1.40911	1.45935	1.43732	1.44022	0.0124783
						5	3	5	1	0	5	3	3				0	0.878657	0.473866	0	0	0			12	1.53631	1.69773	1.41189	2.02158	1.56537	1.63025	1.64386	0.085106	1.37494	1.35815	1.31949	1.36605	1.28772	1.66662	1.55487	1.41826	0.0524075
						5	2	5	5	1	5	3	3				0.562683	0	0	1.28197	0.574493	0			12.3333	1.56227	1.83217	1.55892	1.60198	1.49531	1.30951	1.56003	0.0689862	1.33016	1.50919	1.43324	1.49304	1.20383	1.47358	1.47327	1.41662	0.0419456
						5	5	5	5	1	5	5	4				1.27259	0	1.48861	0	0	0			12.6667	1.5225	1.63272	1.40076	1.60074	1.38725	1.53395	1.51299	0.0412194	1.18388	1.43013	1.29929	1.31119	1.20563	1.54338	1.41306	1.34094	0.0487299
						5	5	5	5	4	4	5	1				1.8949	0.656039	0.286977	0	0	1.92061			13	1.55274	1.59878	1.58549	1.43955	2.08764	1.39799	1.61036	0.101019	1.26086	1.42697	1.22494	1.56495	1.39445	1.59031	1.35969	1.40316	0.0524966
						5	0	5	5	5	5	5	5				0	1.39772	0	0.668271	0	1.31148			13.3333	1.46143	1.52625	1.75692	1.34979	1.56038	1.40123	1.50933	0.0587738	1.2664	1.3683	1.502	1.18189	1.09818	1.46556	1.32528	1.31537	0.0551345
						3	0	5	5	1	1	5	5				1.59991	0	1.94628	0	0.284277	1.14521			13.6667	1.53298	2.05205	1.80539	1.55135	1.5307	1.69985	1.69539	0.0843744	1.22717	1.49436	1.34034	1.34945	1.27113	1.51976	1.31315	1.35934	0.0413485
						5	5	1	0	5	0	5	1				0	0.669972	1.10583	0.13658	0	0			14	1.59417	2.12339	1.3724	1.69795	1.54186	1.47762	1.63457	0.107479	1.16831	1.46459	1.5503	1.21508	1.23904	1.64421	1.34888	1.37577	0.0687793
						5	5	5	5	5	3	5	1				0	0.650618	0	1.22564	0	0			14.3333	1.65156	1.69474	1.42051	1.26966	1.4642	1.67024	1.52848	0.0696818	1.24508	1.33274	1.31568	1.42851	1.54925	1.36911	1.29485	1.36217	0.0380223
						0	0	5	5	5	3	5	1				0.693433	0.749008	1.41173	1.44082	0	0			14.6667	1.64049	1.95991	1.71151	1.44669	1.5858	1.59877	1.65719	0.070164	1.20947	1.33743	1.51852	1.57209	1.40611	1.39455	1.49885	1.41958	0.0465571
						5	4	1	5	3	3	0	4				1.20642	0	0.537432	0	0.663482	0.600673			15	1.54572	1.78042	1.30508	1.18052	1.40672	1.54058	1.45984	0.0859184	1.15104	1.46405	1.29331	1.28238	1.29998	1.44966	1.24985	1.3129	0.0417484
						3	1	3	5	5	0	3	5				0.814067	0.700673	0.734727	0	0	0			15.3333	1.48678	1.95597	1.64419	1.41905	1.52001	1.4892	1.58587	0.0799386	1.0988	1.28694	1.23269	1.33954	1.27414	1.39425	1.46511	1.29878	0.044601
						5	1	3	5	5	3	5	0				1.79986	0	0.95429	0	0.646057	1.53894			15.6667	1.47131	1.80898	1.36396	1.23456	1.41005	1.57223	1.47685	0.0806951	1.24103	1.32631	1.35661	1.40799	1.2989	1.48524	1.33234	1.34977	0.0297032
						5	1	5	5	4	3	5	5				0	0	0.429572	0	0	0			16	1.52334	1.90219	1.68925	1.45632	1.48985	1.42862	1.58159	0.0742249	1.41737	1.25848	1.30615	1.22522	1.38171	1.56518	1.14377	1.32827	0.0527662
						5	3	5	5	0	5	5	5				0.911993	0	0.901144	0	0	0			16.3333	1.47369	1.85989	1.5801	1.34513	1.41812	1.4293	1.5177	0.0753739	1.16554	1.18247	1.47671	1.26648	1.29289	1.46828	1.28029	1.30467	0.0470178
						5	3	3	3	1	5	5	0				0	0	0.56478	0	0	0			16.6666	1.47155	1.75067	1.43954	1.60912	1.60005	1.6454	1.58605	0.046878	1.20542	1.34627	1.24858	1.17106	1.44661	1.40939	1.3663	1.31337	0.0399287
						5	0	1	1	5	1	5	3				0.404155	0	0	0.872981	0.769764	0			17	1.445	1.85308	1.69696	1.68863	1.53283	1.40922	1.60429	0.0697926	1.25425	1.34223	1.40249	1.33194	1.27065	1.53565	1.39034	1.36108	0.0358045
						3	5	0	5	0	0	3	5				0	0	0.900522	0	1.28205	0			17.3333	1.43571	1.7723	1.53361	1.90946	1.47702	1.31377	1.57364	0.0912385	1.18516	1.28585	1.21159	1.16691	1.59372	1.57033	1.35329	1.33812	0.0674244
						5	5	1	5	0	0	1	0				0	1.18294	0	0.507795	1.37231	0			17.6666	1.49905	1.95645	1.49555	1.64981	1.39223	1.57461	1.59462	0.0804724	1.12481	1.10875	1.19952	1.57924	1.16032	1.53429	1.52752	1.31921	0.0814931
						5	3	1	5	0	5	3	1				0.280804	0	0.923105	0.743494	0	0			18	1.5031	1.8955	1.3049	1.15847	1.34188	1.61103	1.46915	0.106888	1.43635	1.17538	1.26268	1.20079	1.19121	1.46768	1.27676	1.28726	0.0449104
						5	3	2	0	3	5	5	3				0.306213	0	0	0.338995	0	0			18.3333	1.56298	1.77768	1.35355	1.72745	1.52048	1.50825	1.57507	0.0634904	1.27386	1.18312	1.36652	1.34484	1.14469	1.62907	1.37204	1.33059	0.0601236
						0	1	5	0	5	0	5	0				0	2.31508	0.523026	0.415991	0	0			18.6666	1.45547	1.69737	1.64167	1.61192	1.36112	1.4977	1.54421	0.0519939	1.015	1.16251	1.43426	1.3967	1.13928	1.42816	1.53149	1.30106	0.0729224
						5	5	3	5	2	0	0	3				0	0	0.861104	0	0.587165	1.7321			19	1.65692	1.62256	1.29054	1.51098	1.33761	1.52272	1.49022	0.0605398	1.0698	1.21486	1.35788	1.35037	1.40983	1.46616	1.32859	1.31393	0.0500623
						0	5	5	1	3	1	5	5				0	0.845166	0.407548	0	0.49975	0.407805			19.3333	1.52834	1.52792	1.70827	1.29575	1.38226	1.73932	1.53031	0.0712523	1.19881	1.20428	1.21185	1.36835	1.0364	1.24391	1.23816	1.21454	0.0368948
						3	3	1	1	5	1	5	3				0.245785	0.608014	0	0	0.825151	0			19.6666	1.46976	1.96493	1.37832	1.27152	1.39532	1.35494	1.47247	0.101904	1.09325	1.25761	1.25366	1.32041	1.39553	1.42695	1.2386	1.28372	0.0420488
						4	5	5	5	0	1	0	3				0	0.72889	1.65417	0	0	0			20	1.45059	1.40543	1.49591	1.46688	1.57321	1.48954	1.48026	0.0228246	1.15189	1.29479	1.26599	1.27086	1.32173	1.42301	1.14112	1.26706	0.03691
						5	5	5	5	5	5	5	3				0.860067	0	0.824402	0	0	0.807428			20.3333	1.33451	1.75951	1.26397	1.31531	1.32122	1.39629	1.39847	0.074256	1.18345	1.278	1.28086	1.14041	1.16248	1.28463	1.43732	1.25245	0.0384463
						4	5	5	5	5	1	0	0				0.917431	0.376237	0.395226	0.985999	0	0.974564			20.6666	1.48309	1.50832	1.56861	1.53583	1.61549	1.30458	1.50265	0.0439055	1.07023	1.18727	1.29547	1.30935	1.37077	1.32294	1.10341	1.23706	0.0442039
						5	1	5	0	5	2	1	5				0.681663	0.213716	0.63674	0	0	0.390031			21	1.53738	1.81161	1.85673	1.43644	1.59506	1.58363	1.63681	0.0667152	1.11991	1.23023	1.18414	1.16853	1.21921	1.31749	1.10385	1.19191	0.027399
						1	5	5	1	5	5	5	5				0	0	0.392326	0.407	0	0			21.3333	1.65727	1.64694	1.65675	1.41128	1.33737	1.56508	1.54578	0.0568262	1.17236	1.12096	1.1286	1.10514	1.37414	1.53687	1.11841	1.22235	0.0632584
						5	5	5	5	5	5	0	0				1.56789	0.520562		1.11068	0.391988	0.461084			21.6666	1.58334	1.95896	1.62229	1.16282	1.57701	1.54279	1.57453	0.103386	1.09347	1.14245	1.2923	1.10468	1.05876	1.48917	1.23243	1.20189	0.0570847
						5	3	5	5	3	5	5	5				0	0		0	0.389469	0.377487			22	1.53215	1.70908	1.21855	1.29885	1.26113	1.52833	1.42468	0.0792138	1.05146	1.21333	1.43845	1.29644	1.22847	1.33399	1.06988	1.23315	0.0526456
						5	5		3	5	5	5	3				0	0.239877		1.21036	0	0.684838			22.3333	1.37987	1.97055	1.55551	1.07057	1.54328	1.50026	1.50334	0.119043	1.07726	1.22369	1.2046	1.37964	1.20275	1.39879	1.11002	1.22811	0.0462932
						5	5		5	3	0	5	5				0	0.409651		0	0.61177	0			22.6666	1.46678	1.77409	1.42608	1.52402	1.44852	1.54671	1.53103	0.0520653	1.10967	1.14572	1.25379	1.12497	1.2632	1.3352	1.24191	1.21064	0.0319475
						3	5		3	3	1	5	5				0.977422	0.641272		0	0	0.5003			23	1.50798	1.77134	1.45695	1.1153	1.59435	1.30866	1.4591	0.0929179	1.189	1.24474	1.32572	1.16876	1.24012	1.25541	1.23441	1.23688	0.019054
						0	3		3	5	5	5	5				0	0		0	0.429332	0			23.3333	1.52214	1.77744	1.40812	1.58707	1.24261	1.61698	1.52573	0.0751549	1.12993	1.33514	1.19736	1.19411	1.29	1.36896	1.25118	1.25238	0.0320993
						5	5		3	4	5	0	5				1.16489	0.954381		0		0			23.6666	1.32368	1.76441	1.35696	1.40259	1.76844	1.49906	1.51919	0.0818132	1.08643	1.10406	1.31517	1.21808	1.21837	1.61559	1.27478	1.26178	0.066837
						3	5		5	5	5	5	5				0			0					24	1.51667	1.64145	1.54886	1.36376	1.7853	1.45959	1.5526	0.0599048	1.14294	1.09577	1.45841	1.31603	1.19722	1.54232	1.27147	1.28916	0.0619143
						0	1		5	4	1	5	5				0								24.3333	1.45583	1.94115	1.3785	1.96225	1.77295	1.37468	1.64756	0.11322	1.19134	1.43765	1.54979	1.25772	1.2257	1.3302	1.37402	1.33806	0.0479851
						0	5		4	5	3	1	5			Animal Mean	0.53216	0.407664	0.510436	0.297666	0.286925	0.35532			24.6666	1.68751	1.62782	1.5941	1.47185	1.49958	1.45567	1.55609	0.0383998	1.07385	1.13329	1.51331	1.36305	1.18856	1.19712	1.30036	1.25279	0.056866
						5	5		5	5	5	1	3			Mean	0.48342			0.313304					25	1.38273	1.73908	1.46485	1.60105	1.61834	1.49396	1.55	0.0520884	1.14699	1.1612	1.24959	1.01411	1.35479	1.35715	1.10142	1.19789	0.0487154
						5	5		5	5	5	5	3			SEM	0.0383936			0.0212356					25.3333	1.52298	1.61862	1.35535	1.30134	1.22883	1.41807	1.40753	0.0588591	1.05679	1.18847	1.4349	1.28768	1.19409	1.43164	1.19295	1.25522	0.0525326
						5	5		3	5	5	5	0												25.6666	1.59191	1.57381	1.46503	1.3942	1.72189	1.49498	1.5403	0.0468418	1.07214	1.08694	1.18681	1.48866	1.23916	1.2489	1.01078	1.19048	0.0601042
						5	3		3	5	5	3	1												26	1.48297	1.48873	1.1884	1.26438	1.86462	1.5023	1.46523	0.0963908	1.11842	1.30265	1.22201	0.96801	1.34409	1.12354	1.31337	1.19887	0.0513966
						5	3		5	5	0	5	1												26.3333	1.42273	1.61384	1.24548	1.38985	1.35328	1.68845	1.45227	0.0681206	1.06127	1.2912	1.20727	1.18789	1.24109	1.49099	1.19846	1.23974	0.0495396
						1	3		3	1	3	1	3												26.6666	1.53476	1.68638	1.4679	0.942739	1.56656	1.68504	1.48056	0.113125	1.16298	1.22107	1.28086	1.12312	1.31596	1.72536	1.47812	1.32964	0.0791952
						0	1		1	5	5	5	5												27	1.38416	1.64204	1.31208	1.27897	1.01342	1.66479	1.38258	0.0998253	1.03867	1.31028	1.30234	1.13672	1.29409	1.42801	1.35836	1.26692	0.0505295
						5	0		5	5	1	1	5												27.3333	1.48619	1.63236	1.30777	1.08144	1.44282	1.54807	1.41644	0.0803202	1.16853	1.25412	1.06848	1.2031	1.07066	1.25602	1.26617	1.18387	0.0322382
						5	0		1	0	5	1	5												27.6666	1.3232	1.62507	1.51601	1.42215	1.39675	1.56508	1.47471	0.0462885	1.05615	1.27822	1.39118	1.09385	1.2019	1.25708	1.08863	1.19529	0.0463257
						5	0		1	2	2	5	3												28	1.27915	1.62424	1.40094	1.41066	1.96342	1.5462	1.53744	0.0984026	1.22674	1.39665	1.12504	1.00996	1.15239	1.48039	1.17001	1.22303	0.0615663
						4	3			5	5	5	3												28.3333	1.51393	1.49912	1.33362	1.447	1.64042	1.35307	1.46453	0.0463472	0.890468	1.10242	1.25607	1.2591	1.17558	1.42801	1.09018	1.17169	0.0638086
						1	3			5	0	5	5												28.6666	1.55191	1.58253	1.33111	1.70789	1.25543	1.47422	1.48385	0.0683519	0.990049	1.29021	1.33322	1.38748	1.29325	1.49977	1.19758	1.28451	0.0604913
						3	3			0	3	5	0												29	1.48833	1.66774	1.6625	1.37184	1.55278	1.64506	1.56471	0.0482381	0.938659	1.25248	1.1319	1.1245	1.19662	1.45344	1.10098	1.17123	0.0596906
						1	3			0	5	5	5												29.3333	1.47988	1.7276	1.45085	1.27649	1.63757	1.73677	1.55153	0.0738551	1.05786	1.19915	1.34402	1.08694	1.3287	1.50704	1.05312	1.22526	0.0657693
						5	3			5	5	5	5												29.6666	1.4775	1.91618	1.5345	1.24978	1.33666	1.50672	1.50356	0.0938364	1.05338	1.30308	1.31009	1.12566	1.21104	1.44527	1.21677	1.2379	0.0488623
						3	1			3	0	5	5												30	1.33796	1.61432	1.24638	1.29978	1.55136	1.44989	1.41662	0.0597679	1.0956	1.23732	1.22913	1.10814	1.30755	1.53793	1.25382	1.25278	0.0557916
						1	0			3	5	5	5												30.3333	1.36189	1.62938	1.69625	1.44483	1.48343	1.50808	1.52064	0.0500505	1.06831	1.00406	1.28594	0.990136	1.13772	1.41226	1.08488	1.14047	0.0586653
						3	3			0	2	5	3												30.6666	1.41833	1.73788	1.51853	1.26748	1.7017	1.43934	1.51388	0.0732284	0.98024	1.27189	1.44888	1.38702	1.31464	1.3626	1.099	1.26632	0.063503
						1	1			1	5	0	3												31	1.49048	1.53868	1.28103	1.30662	1.4395	1.48596	1.42371	0.0431543	0.992181	1.278	1.22201	1.34484	1.35106	1.48039	1.29749	1.28085	0.0568872
						1	5			0	5	5	3												31.3333	1.32046	1.6951	1.58477	1.38147	1.52571	1.59605	1.51726	0.0576292	1.01798	1.27767	1.08348	1.45086	1.13111	1.31703	1.09326	1.19591	0.058836
						3	5			4	5	5	5												31.6666	1.45881	1.66331	1.54725	1.7992	1.29415	1.52033	1.54717	0.0706063	1.03568	1.19108	1.11004	1.13902	1.29277	1.38259	1.3319	1.21187	0.0481183
						3	3			5	3	3	5												32	1.41773	1.50617	1.57328	1.57496	1.77034	1.38999	1.53875	0.0559673	1.0875	1.10122	1.10089	1.05098	1.34757	1.30008	1.21015	1.1712	0.0437887
						3	1			5	1	3	5												32.3333	1.14045	1.53772	1.64957	1.21872	1.41171	1.31377	1.37866	0.0788083	0.969365	1.05335	1.21401	1.21209	1.29601	1.3405	1.30301	1.19833	0.0522335
						5	3			1	3	3	1												32.6666	1.54738	1.71255	1.34332	0.974605	0.87828	1.61766	1.34563	0.142058	1.0182	1.11584	1.32661	0.957408	1.38808	1.43043	1.21655	1.20759	0.0695839
						0	0			0	2	4	5												33	1.47571	1.9476	1.34852	1.03952	1.35993	1.27208	1.40723	0.123269	0.976402	1.18312	0.952191	1.44856	1.13352	1.39273	1.18633	1.18184	0.0711996
						3	5			5	3	2	5												33.3333	1.48297	1.69307	1.2374	1.27711	1.62689	1.57087	1.48139	0.0764297	1.20819	1.16393	1.19799	1.09477	1.31837	1.25163	1.56833	1.2576	0.058056
						1	5			5	5	5	1												33.6666	1.41987	1.80002	1.25571	0.950379	1.24593	1.45023	1.35369	0.115005	1.12012	1.19065	1.16164	1.07564	1.39	1.29281	1.3394	1.22432	0.0445635
						1	0			3	1	5	5												34	1.43357	1.83563	1.3137	1.36998	1.08182	1.29505	1.38829	0.101765	0.969365	1.20537	1.02819	1.07172	1.20827	1.69447	1.20883	1.19803	0.0904772
						3	5			3	5	1	5												34.3333	1.36344	1.68721	1.52409	1.37122	1.36753	1.61494	1.48807	0.0579562	1.00562	1.14943	1.19189	1.02839	1.22366	1.2059	1.07143	1.12519	0.0337374
						3	5			5	0	2	0												34.6666	1.42416	1.65113	1.2094	1.03672	1.39746	1.59095	1.38497	0.0943503	1.13121	1.10657	1.47951	1.25449	1.32474	1.57245	1.0593	1.27547	0.0738018
						3	5			5	5	5	5												35	1.47476	2.10749	1.16183	1.65975	1.24736	1.76365	1.56914	0.143088	1.12652	1.10351	1.28747	0.959943	1.19866	1.49251	1.17023	1.19126	0.062849
						3	5			1	1	5	0												35.3333	1.42904	1.56783	1.30418	1.00194	1.66132	1.43253	1.39948	0.0941619	1.07854	1.2648	1.27768	1.21739	1.27895	1.43618	1.31712	1.26724	0.0406421
						1	5			0	1	5	0												35.6666	1.30998	1.50713	1.11479	1.58117	1.33808	1.35954	1.36845	0.0666439	0.834174	1.21617	1.31327	1.10722	1.54048	1.24224	1.1484	1.20028	0.0810497
						3	5				0	1	3												36	1.30903	1.50713	1.21838	1.11064	1.60314	1.49566	1.374	0.0780654	0.950174	1.23034	1.24349	1.14041	1.21753	1.29932	1.275	1.19375	0.0448009
						5	5				5	5	5												36.3333	1.40475	1.32346	1.45677	1.63273	1.41123	1.42658	1.44259	0.0421177	1.00327	1.16676	1.12123	1.41906	1.32354	1.22816	1.18832	1.20719	0.0511364
						5	5				5	5	0												36.6666	1.38713	1.79369	1.19989	1.39047	1.7169	1.45567	1.49063	0.0912028	0.947189	1.11638	1.35114	1.37019	1.21152	1.25466	1.31095	1.22315	0.0565672
						3	5				5	5	5												37	1.28248	1.66857	1.41997	1.58769	1.72545	1.44138	1.52092	0.0686685	0.969579	1.2106	1.02108	1.0171	1.27185	1.21741	1.09238	1.11429	0.0447992
						3	1				3	3	0												37.3333	1.30606	1.53975	1.5494	1.29885	1.07921	1.64131	1.40243	0.0860258	0.967446	1.19217	1.09047	1.12796	1.25851	1.2536	1.21214	1.15747	0.0393736
						1	5				3	0	3												37.6666	1.36106	1.5891	1.58836	1.33426	1.51573	1.3318	1.45339	0.0509975	1.19284	1.09294	1.29408	1.06458	1.16272	1.54141	1.18788	1.21949	0.0605805
						5	5				5	5	0												38	1.40511	1.53127	1.64311	1.25879	1.13668	1.44598	1.40349	0.0747614	1.08558	1.11137	1.12237	1.02586	1.28484	1.18895	1.08907	1.12972	0.0317532
						5	0				1	5	0												38.3333	1.49821	1.4947	1.58567		2.07339	1.41739	1.61387	0.117927	1.00178	1.01878	1.08589	0.989444	1.13664	1.57017	1.06084	1.12336	0.0769639
						3	3					0	0												38.6666	1.32999	1.67275	1.43792	1.44762	1.30175	1.38472	1.42913	0.0540988	1.04357	1.20482	1.39562	1.06366	1.13279	1.42574	1.1248	1.19872	0.0582418
						5	3					5	5												39	1.27951	1.42121	1.47131		1.44021	1.56015	1.43448	0.0454837	0.997299	1.03634	1.22608	1.4912	1.33087	1.59273	0.799712	1.2106	0.107366
						0	2					3	2												39.3333	1.27986	1.55469	1.30347		1.5136	1.2571	1.38174	0.0629831	0.88727	1.28182	1.41837	1.45201	1.05719	1.40288	1.09106	1.22723	0.0822197
						0	5					0	5												39.6666	1.63953	1.61695	1.28587		1.39176	1.24604	1.43603	0.0820815	0.987064	1.1178	1.49387	1.405	1.25659	1.49538	0.784273	1.22	0.102465
						1	5					3	5												40	1.29367	1.75127			1.63211	1.31887	1.49898	0.114004	1.04165	1.28825	1.16749	1.41883	1.28868	1.26964	0.989384	1.20913	0.0573821
						5	3					5	5
						5	5					5	3
						5	5					5	3
						1	3					0	3
						5	3					3	1
						5	1					1	1
						5	5					3	1
						5	5					3	2
						5	0					0	0
						5	3					1	3
						0	3					1	3
						5	0					5	0
						5						5	0
						5						5	5
						5						5
						3						2
						0						1
						5						1
						3						5
						1						5
						5						5
						3						5
						3						3
						5						5
						5						5
						5						1
						3						1
						0						1
						4						1
						5						3
						1						1
						5						0
						5
						5
						5
						5
						3
						3
						3
						5
						1
						2
						1
						3
						3
						5
					Animal Mean	3.45178	3.30061	3.52577	3.22609	3.0942	3.19178	3.21858	3.10909
					Mean	3.37606				3.15341
					SEM	0.0685147				0.0305355

## Sheet: Fig 4 -Sup Fig 1
Figure 4-Supplement Figure 1b					Figure 4-Supplement Figure 1f									Figure 4-Supplement Figure 1g									Figure 4-Supplement Figure 1i
	Relative C1ql2 protein levels					Active Zone length (nm)									Docked vesicles diameter (nm)									ZnT3+ MFB per ROI
	+shNS-EGFP	+shC1ql2-EGFP				+shNS-EGFP			+shC1ql2-EGFP						+shNS-EGFP			+shC1ql2-EGFP						+shNS-EGFP				+shC1ql2-EGFP
animal #1	0.936906	1.03716				animal #1	animal #2	animal #3	animal #1	animal #2	animal #3				animal #1	animal #2	animal #3	animal #1	animal #2	animal #3				animal #1	animal #2	animal #3	animal #4	animal #1	animal #2	animal #3
animal #2	1.23056	0.932587				227.43	111.6	284.38	192.71	122.11	194.9				44.14	29.44	31.35	23.18	38.5	28.29				799.874	2147.02	1698.96	2208.96	1313.8	833.34	1399.16
animal #3	0.802539	0.919748				169.64	110.45	230.68	205.77	155.32	136.7				31.61	24.12	72.07	33.23	19.67	20.07				1313.84	2122.7	1837.18	2103.87	988.858	1094.81	1520.5
animal #4	1.03	1.05407				138.38	111.87	235.46	177.51	68.23	195.02				33.23	22.28	43.32	28.88	42.19	21.66				1813.9	2763.79	2738.53	2514.01	2217.83	1322.86	1882.32
Mean	1	0.985893				268.47	210.16	166.41	244.04	180.46	125.14				27.5	35.54	23.4	25.95	32.64	33.39				2075.9	2402.09	2003.07	1513.32	1592.01	1802.4	1707.02
SEM	0.0899201	0.034754				204.03	127.24	232.64	122.01	174.18	263.48				27.17	19.67	26.16	25.31	53.01	29.72				1474.51	1742.64	2116.77	1394.98	1144.75	1910.52	1990.08
						112.43	167.99	118.69	377.23	149.43	95.07				36.78	25.75	30.79	23.26	28.96	43.7				2117.87	2069	2245.58	1654.53	1851.23	1601	2247.86
						87.44	157.64	266.47	96.59	60.41	108.64				30.54	29.86	30.79	30.09	36.47	36.55				1439.97	2188.07	1720.15	1059.56	1468.58	1735.77	1855.09
						305.04	402.78	108.54	272.49	90.05	118.44				44.33	43.53	42.19	30.54	39.1	28.19				965.035	1745.2	1446.51	1145.17	858.234	1524.2	1798.77
Figure 4-Supplement Figure 1c						169.73	70.42	90.28	331.58	323	132.1				43.2	38.06	39.94	26.79	35.24	34.21				1649.18	2352.12	1998.2	1595.5	1480.33	1935.62	2122.65
Data included in source data Figure 4 file						68.3	104.83	179	79.5	84.22	204.74				44.89	30.78	30.34	35.79	29.44	38.25				2280.24	2016.35	1139.77	1147.51	1091.77	1779.81	1033.51
						193.87	127.12	126.31	82.53	82.51	46.16				37.88	46.38	20.68	26.58	18.59	30.54				1427.34	1554.45	1167.52	1219.82	747.64	1776.42	1107.09
						211.79	165.18	222.31	76.71	294.36	254.11				41.1	48.86	21.09	35.94	37.73	66.16				2131.54	1505.11	2401.42	1669.65	1239.16	1777.96	2135.07
						256.15	121.38	180.41	187.52	125.73	75.07				40.42	38.93	25.77	37.73	22.35	48.24				1930.73	1558.86	1277.52	913.061	903.147	1753.9	1662.01
Figure 4-Supplement Figure 1d-e						153.75	125.43	121.52	74.67	232	106.87				35.24	30.78	31.51	30.12	30.63	41.21				1685.02	1488.53	1480.37	958.173	996.416	1354.62	1578
Data included in source data Figure 4 file						168.33	335.95	298.07	213.44	394.14	102.98				38.89	37.32	50.5	31.94	36.44	71.34				1868.65	2220.7	1957.85	933.785	1529.05	1784.72	2212.37
						248.11	122.24	378.74	127.18	260.56	238.51				39.39	51.83	35.49	28.24	20.01	21.66				1330.16	998.738	1886.74	1557.09	1342.91	1136.6	1986.64
						201.62	467.63	144.17	236.64	174.56	293.53				37.67	55.26	25.42	31.51	28.18	24.98				1069.23	1182.79	1649.6	762.696	1270.1	964.585	1183.07
						63.91	165.97	206.16	104.99	195.96	114.84				26.79	31.49	23.61	44.44	27.32	37.59				1771.39	1263.62	2457.9	959.946	2668.9	2014.31	1965.68
						205.75	126.49	129.86	107.18	169.48	101.06				23.5	40.2	20.21	41.58	69.74	46.99				1785.87	1451.3	1199.46	872.474	1484.81	1332.87	771.306
						102.01	220.64	201.69	167.87	130.5	193.17				42.23	37.32	24.19	41.37	38.69	38.53				1390.07	1028.6	1127.88	787.073	1293.36	1196.31	890.317
						189.29	109	167.21	182.72	164.63	173.3				37	59.06	25.95	33.76	30.34	30.63				1714.71	2242.78	1896.14	1309.71	2641.87	1426.14	1815.89
						164.32	87.37	92.14	102.57	200.07	89.96				37	46.06	39.87	30.62	20.01	27.5				1103.8	1165.21	717.736	1127.75	1363.85	1560.25	1375.86
						177.01	99.59	213	136.39	108.59	183.28				31.45	43.53	28.19	33.3	37.96	28.29				1086.65	1172.51	765.534	830.284	1206.1	1210.54	1050.49
						83.99	142.55	218.56	111.46	53.78	74.19				42.55	43.53	30.12	35.35	34.93	21.66				1593.61	1961.21	1240.63	1332.19	3035.48	1920.63	2228.71
						186.57	60.18	178.29	65.32	53.79	146.54				40.62	36.11	35.95	44.89	37.67	30.09				1214.03	1382.58	935.677	690.663	1254.82	1467.75	1396.67
						228.5	106.88	270.14	501.72	283.4	180.73				52.23	46.86	35.51	25.31	45.62	49.48				1078.99	1063.17	856.493	713.842	1227.05	1121.59	1271.05
						177.24	143.55	153.53	173.96	114.77	108.38				34.91	31.67	20.01	23.4	33.64	26.27				1811.73	1309.08	1858.54	1009.31	2499.96	1715.82	2281.24
						74.58	189.69	163.2	159.62	96.15	259.44				36.49	34.41	27.05	41.94	32.98	35.94				1156.48	1304.34	966.598	896.981	1007.21	968.28	1326.6
						206.71	132.07	96.81	165.88	93.61	217.58				41.08	39.94	31.51	53.78	24.98	27.4				1103.99	1151.64	857.814	1183.54	957.658	878.834	1266.92
						191.73	136.31	147.3	188.86	156.16	151.69				30.63	41.08	45.38	27.5	59	18.8				1892.74	2440.16	2131.69	2123.63	2860.83	1549.15	2196.23
						93.99	175.36	193.04	145.32	50.26	121.9				35.24	37.96	52.54	18.87	50.33	22.35			Animal Mean	1535.9	1699.81	1592.59	1272.97	1517.92	1481.72	1641.94
						257	119.46	152.59	243.8	255.51	192.47				35.94	40.02	31.61	44.44	22.58	18.5			Mean	1525.32				1547.19
						84.54	125.82	162.24	103.61	106.25	249.09				35.24	39.38	26.79	28.78	26.94	38.14			SEM	90.7222				48.5117
						136.6	582.75	172.86	137.08	86.97	153.75				20.68	38.14	42.29	28.18	48	34.91
						49.56	111.82	163.81	218.79	219.56	152.11				18.5	29.83	33.64	38.85	35.2	24.68
						181.1	151.09	133.94	222.58	122.55	184				30.12	28.18	30.9	24.68	37.42	40.74
						99.96	223.82	173.37	440.94	122.94	81.02				24.05	25.16	33.35	36.72	39.85	31.01
						95.84	220.01	182.37	279.26	217.41	105.73				36.11	61.5	25.77	42.19	35.59	21.38
						120.31	214	164.73	200.8	193.07	218.88				30.78	39.03	32.36	28.96	43.98	40.75
						65.79	267.79	325.77	200.79	108.78	309.62				37.32	30.62	22.88	28.3	26.68	39.07
						166.66	120.61	90.69	193.97	81.15	201.85				31.49	37.88	41.08	24.12	32.31	21.38
						82.62	109.96	134.11	131.93	298.77	366.96				36.72	46.34	25.16	52.54	37.23	33.39
						337.98	130.73	269.23	198.85	302.99	191.91				27.53	30.54	46.58	42.55	30.63	29.72
						113.36	80.33	276.16	137.66	149.16	181.48				30.23	31.61	28.18	33.64	29.9	36.55
						108.16	190.05	93.11	113.17	217.94	211.39				30.05	42.36	24.12	35.55	37.88	42.87
						151.24	125.22	174.42	84.35	123.79	251.43				35.49	37.88	31.51	34.41	37.15	45.62
						101.77	133.79	208.56	187.63	118.2	101.06				40.34	33.1	28	57.62	47.92	43.32
						269.39	260.56	247.31	572.92	43.98	160.2				20.21	28.3	20.01	70.69	36.49	44.87
						165.48	100.33	98.82	667.79	96.81	138.76				32.89	32.94	35.35	50.16	36.78	51.74
						232.23	79.1	194.46	241.02	194.48	140.99				21.15	35.32	21.09	43.19	52.17	18.94
						306.58	151.84	369.03	251.52	159.92	166.97				39.94	37.88	32.36	56.75	35.35	28.96
						184.5	133.23	151.11	190.94	288.39	394.85				39.94	30.09	26.94			22.51
						112.96	342.23	149.87	288.29	60.72	303.95				40.01	46.16	33.22			58.42
						56.75	229.63	277.68	185.07	182.02	293.68				30.63	28.86	22.17			37.96
						147.25	209.86	69.08	136.77	190.06	102.81				26.07	46.64	25.97			28.18
						70.52	161.28	100.54	318.27	76.49	257.84				32.88	28.68	37			55.01
						73.74	162.59	185.18	222.74	79.88	216.16				18.88	30.54	42.19			30.63
						110.13	139.51	56.63	127.47	241.22	164.58				23.61	30.09	22.28			31.4
						79.92	121.93	177.62	281.22	480.44	264.49				33.05	32.08	40.75			39.85
						138.94	269.31	159.6	206.85	147.59	201.77				51.93	26.79	26.91			52.62
						204.46	167.28	127.35	343.22	45.62	236.06				55.56	28.19	31.49			38.5
						198.6	84.59	162.53	114.89	150.74	233.12				26.91	42.36	20.31			28.72
						119.73	321.21	195.5	139.19	124.72	216.99				21.38	33.89	42.23
						162.48	103.41	113.75	156.34	229.78	116.27				59.44	28	24.07
						93.54	255.82	60.95	308.08	368.88	201.69				34.37	44.79	28.33
						125.84	57.44	184.51	356.91	109.54	135.89				26.07	34.11	49.63
						86.15	227.62	211.03	430.07	417.64	135.07				33.38	40.58	34.37
						177.72	151.97	216.47	156.01	522.2	67.28				35.49	27.5	52.25
						78.58	310.65	201.53	72.37	92.52	119.28				24.98	24.19	24.03
						158.32	152.43	348.46	100.95	262.55	156.2				25.95	24.19	31.67
						72.22	143.09	67.6	149.64	92.52	152.5				39.59	23.14	33.38
						187.51	106.38	154.14	171.42	351.77	174.64				35.35	24.53	37.32
						156.03	149.26	90.43	732.17	94.65	103.49				30.12		28.72
						59.06	307.4	142.03	81.59	111.39	108.31				38.06		33.05
						144.21	133.51	141.67	138.81	344.67	136.39				38.06		23.61					Mean
						165.78	104.28	186.07	109.22	150.72	166.48				26.71		35.49					SEM
						122.84	142.72	272.21	163.08	100.06	124.06				20.31		33.23
						55.56	187.85	104.79	110.77	309.57	64.98				33.05		34.93
						110.57	78.06	232.79	162.41	113.73	98.82				21.38		38.75
						109.65	195.63	110.97	195.28	127.63	142.72				33.55		33.64
						262.39	128.7	177.06	84.88	188.81	131.57				42.75		35.92
						247.43	372.01	97.33	114.55	129.91	308.34						32.73
						210.92	155.35	333.14	72.87	234	192.5						35.92
						207.44	169.07	267.82	196.93	145.74	136.16						40.62
						356.12	79.92	108.33	134.5	204.75	148.15						24.05
						326.57	234.54	157.89	294.99	105.47	130.26						49.99
						78.78	86.39	382.39	240.39	270.54	123.46						43.86
						113.51	187.83	232.26	183.37	340.62	173.2						54.44
						139.05	118.32	245.37	159.69	200.1	490.43			Animal Mean	34.0733	35.8197	32.9476	35.3629	35.7335	35.0003
						406.86	164.47	244.63	121.21	242.38	178.53			Mean	34.2802			35.3656
						212.48	274.39	181.36	158.86	168.2	277.66			SEM	0.835535			0.211663
						116.27	174.59	121.3	197	161.74	123.85
						109	265.79	253.02	101.42	102.98	102.61
						146.7	467.91	157.05	64.12	67.93	256.39
						104.56	306.2	254.89	245.7	73.73	282.82
						63.78	192.1		180.07	255.11	216.88
						98.24	179.85		192.93	256.76	264.91
						55.56	416.88		82.62	139.57	292.04
						130.02	244.11		114.36	163.46	143.56
						204.62	155.94		175.41	200.56	199.88
						182.26	111.4		64.75	232.92	76.66
						171.69	104.78		92.02		366.84
						215.32			112.68
						129.85
					Animal Mean	156.82	178.19	183.879	191.998	176.392	179.159
					Mean	172.963			182.517
					SEM	8.23695			4.80752
