# Supplementary material for: Regulation of hippocampal mossy fiber-CA3 synapse function by a Bcl11b/C1ql2/Nrxn3(25b+) pathway
Source: eLife. 2024 Feb 15;12:RP89854. doi: 10.7554/eLife.89854 (PMC10942602; doi:10.7554/eLife.89854)
Supplement: Figure 7—source data 1. [file elife-89854-fig7-data1.xlsx]

## Sheet: Figure 7
Figure 7b					Figure 7d									Figure 7g & Supplement Figure 1d									Figure 7h & Supplement Figure 1f-g
	Relative Nrxn3 mRNA levels					Intergrated density of C1ql2 fluorescence (AU)									Average synapse score									Number of docked vesicles per 100nm of AZ profile length
	+inactive Cre	+Cre				+inactive Cre			+Cre						+inactive Cre			+Cre						+inactive Cre			+Cre
animal #1	0.900717	0.329682				animal #1	animal #2	animal #3	animal #1	animal #2	animal #3				animal #1	animal #2	animal #3	animal #1	animal #2	animal #3				animal #1	animal #2	animal #3	animal #1	animal #2	animal #3
animal #2	1.08108	0.647288				166150	79189.8	104169	39422.3	55599.5	46701.7				5	5	0	5	0	5				0.737572	1.01698	1.06	0.318172	0	0.502942
animal #3	1.3066	0.249275				164571	92616.9	110262	44530.2	60190.2	55192.6				3	5	3	5	5	1				1.86237	0	0.55894	0	0.701557	0.906701
animal #4	0.711604	0.299192				180697	95234.4	91612.6	53308.4	58009.8	54790.4				3	5	5	0	5	5				0.427095	0.375516	0	0.720981	0.554201	0.512453
Mean	1	0.381359				203247	97308.7	109012	36898	57289.7	46119.6				3	0	5	3	5	4				0	0	1.02291	0	0.535848	0
SEM	0.127019	0.0901785				195664	111793	97504.4	39075.6	72037.1	58847				3	0	5	5	1	1				0.919879	0.461755	0	0.430867	0.92829	0
						174275	101570	86320.1	47194.5	55074.1	54338				5	2	5	3	3	0				0	0	1.33476	0	0	0
						190307	92145.4	89684.8	19891.2	55620.7	46565.5				5	5	0	3	1	0				0.991179	1.54619	0.984155	0.574581	0	0
						179664	100531	93124.8	24121.5	77525.6	58346.3				0	3	3	1	0	0				0	0.430496	0.997009	0.540394	0	1.15768
						170156	107927	83014	24667.8	54832.5	60268.5				5	3	3	1	5	5				0	0	1.05075	0.841963	0.902201	0
						206249	73247.7	115165	26845.9	62143.1	44413.5				0	5	3	1	5	5				0	0.569801	0	0	0	0
						226474	72154.7	117228	25345.1	68587	56892				2	3	3	1	5	5				0.471809	1.10193	1.50966	0	0.334638	0.465744
						198958	62861.1	97504.8	25542.9	51277	56228.7				1	0	3	5	5	5				0	0	0	0.607017	0	0
						158356	133726	109563	25286.7	58787.7	54216.7				5	0	0	1	1	5				0	1.07759	1.20584	0	0	0
						157118	133551	96533.8	25016.9	65427.6	61745.5				5	0	5	1	5	5				1.56177	0	0	0	0.354711	0.478606
						147281	132920	99472.4	27062.7	65950.1	57378.2				5	5	5	0	0	3				0	0	1.21773	0	0	0
						91674.4	80511.3	106843	28205.4	47752.5	57109.4				0	5	2	1	1	3				0.781006	0.724244	0	0.688563	0	0
						109985	81594.7	109700	29250.9	55676.4	58540.9				5	0	1	1	0	0				0.382059	0	0.343749	0	0	0
						97480.8	84028	98341.6	29706.2	48852.3	57961.3				0	3	1	1	0	3				1.07759	0.48539	0.661332	0	0	0
						133997	94241.9	90214.2	28662.9	54673.2	42187.9				5	4	5	3	1	5				0	0.414852	0	0.445375	0	0.910001
						128316	100478	97046.2	28716.2	53019.4	62281.3				5	5	5	3	1	1				0	0	0	0.776759	0	0
						106118	94186.9	92745.6	25537.2	49592.8	62729.3				5	5	5	5	5	3				0.767165	0.467705	0.580956	0.501203	0	0
						102808	87191.4	128799	23748.2	46545.9	46898.3				1	0	0	5	0	3				0	0	0	0.792393	0.595309	0.449357
						106083	103488	119204	25520.8	50413.8	39626.6				0	3	5	5	4	3				0.955475	0	0	0	0	0
						121460	95586.5	106813	21962.8	51294.4	31004.8				5	0	5	1	1	3				0	0.612357	0	0	0.254246	0
						103108	77218.1	110387	25873	61426.7	83417.2				5	0	5	0	3	3				0	0.819739	0	0.308699	0	0
						119002	103671	115046	24373.8	61885.1	71148.6				5	0	4	5	3	3				1.2178	0.523286	0.504821	0.544247	0	0
						133081	113131	109708	21047.3	58990.3	60665.3				5	5	5	0	3	1				1.3083	0	0.73692	0	0	0.985416
						121193	115768		16053.7						1	5	3	5	1	3				0.436062	1.03231	0	0	0.452817	0
						139464	125833		21662.5						3	5	0	5	5	3				0.354283	0.897666	0	0	0	0
						158868	119075		22533.8						1	5	1	3	5	0				0	0	1.62048	0	0.62461	0
					Animal Mean	149727	98759.3	103149	28568.8	57721.3	55022.8				5	4	1	2	5	0				0.620309	0	0	0	0	0
					Mean	117212			47104.3						5	5	5	3	5	3				0	0.851209	0	0.670354	0	0.17008
					SEM	16306.9			9300.42						5	5	5	5	0	5				0	0.760052	0	0.92098	0.556421	0
															0	5	3	0	1	5				0.579374	0.881174	0.914662	0	0	0
															5	5	5	3	0	5				0	0	0	0	0	0
															5	5	4	1	5	0				0.676911	0	0.726164	0	0	0
															5	0	0	0	3	3				0.795577	0	0.655867	0.639918	0	1.14403
															2	0	0	5	0	3				0	0.436738	0.37652	0	0.530814	0
															3	0	0	5	1	3				0	0.81606	0.764409	0	0.81813	0.285649
															5	5	3	5	5	3				0.68472	0	0	0.562683	0	0
															5	5	3	5	0	3				0	1.34953	0	0	0	0
															3	3	1	1	5	3				0.614288	0	0	0.536078	0	0
															5	3	1	1	5	5				0	0.784344	0.607626	0.970732	0	0
															5	1	5	1	0	1				0	0	0.717738	0.600757	0	0.476122
															5	3	5	5	0	0				0.665026	0	0	0.306937	0	0
															5	5	3	1	0	5				0.968054	0.649899	0	0	0	0.269564
															5	4	0	1	3	5				0.86326	0	0.989707	0	0	0
															3	5	0	3	0	3				0.278435	0	0	0	0	0
															5	0	3	3	3	3				0	0.422066	0	0	0	0
															1	0	3	2	3	0				0.539418	0	0	0	0	0.819874
															5	1	1	0	5	4				0.811557	0.747887	1.05319	0	0.720254	0
															5	1	1	3	5	0				0.549753	0.264417	0.674536	0.58214	0	0
															3	5	5	1	5	2				0.376804	0.79466	0	0	0.388093	0
															5	0	5	1	5	0				0.867754	0.46503	0	0.286131	0	0.539433
															5	5	3	5	5	1				0.687521	0	0.427058	0	0.597586	0
															1	5	0	5	5	0				0.844286	0.806062	0	0	0	0
															1	5	1	0	0	0				0.462834	0	0	0	0	0.664319
															0	5	5	5	5	0				0.501655	0	0	0	0	0
															5	5	5	5	1	0				1.10375	0.595664	0.546388	0	0	0
															5	1	5	0	1	1				0.426294	0	0.793273	0.270102	1.24922	0
															1	5	5	5	0	1				2.11999	0.36249	0	0.515783	0	0
															5	5	5	5	0	0				0	0	0.512847	0.329153	0	0.517277
															5	3	5	5	1	1				0	0.62422	0	0	0	0
															5	5	5	0	0	4				0	0.459495	0	0	0.443262	0
															0	5	3	0	0	1				0	0.50163	0	0	0	0
															1	3	5	3	4	0				0.566797	0	0	0	0	0.314871
															3	5	3	3	5	4				0.911577	0	0.821558	0	0	0
															5	5	3	0	5	0				0	0	0	0.377544	0	0
															1	5	5	1	1	3				0	0	0.248787	0	0.279267	0
															0	4	3	0	1	5				0.703136	0.349663	1.07397	1.47558	0.756487	0.599952
															3	0	3	5	3	5				0.162269	0.506509	0	0	0	0
															0	1	3	1	4	5				0.885191	0.310897	0.900333	0	1.02643	0.506663
															0	3	0	3	5	3				0.983671	0.414938	0	0	0.3521	0
															5	3	0	5	5	3				0	0.518296	0.326403	0.75523	0.435825	0
															5	0	3	4	5	5				0	1.00664	0	0	0.545435	0
															5	0	1	5	2	5				0	0.652188	1.24486	0.436567	0	0.812546
															5	3	5	0	3	5				1.11732	0.469274	0.566958	0	0.400016	0
															1	3	5	1	1	5				0	0	0.21638	0	0	0
															5	3	5	0	5	5				0.757576	0	0	0.473485	0	0.566412
															5	0	1	5	5	1				0.402317	0	0.303509	0	0	0
															0	5	5	5	1	5				1.45603	0.848536	0.590005	0	0	0
															5	5	5	5	4	5				0.841893	0.966277	0	0	0	0.779484
															0	1	3	3	0	5				1.19804	0	0	0.427844	0	0
															0	1	0	1	0	5				0	0	0	0	0.789391	0.320657
															0	1	3	1	0	0				0.330306	0.694927	0	0	0	0
															0	3	3	1	5	0				0.362818	0	0	0.526482	0	0.955475
															0	3	1	3	5	0				0.336417	0.330568	0.536049	0.748335	0	0.372828
															0	1	3	5	5	4				0.432563	0.533803	0.280418	0	0.531689	0
															3	1	0	5	5	3					0	0.160046	0.671096	0	0
															1	1	0	5	5	3					0.41266	0	0	0	0
															1	5	5	1	5	5					0	1.13636	0	0	0.544692
															5	5	3	4	0	5					0	0.313264	0.874967	0	0
															5	5	3	0	5	5					0.504617	0	0.694782	0	0.47895
															0	5	3	0	3	0					0.856751	0	0	0.310627	0
															5	4	5	3	5	5					0.525376	0.825696	0	0	0
															5	1	1	4	1	3					0.723537	0	0	0.502361	0.574581
															5	0	5	5	0	3					0.797894	0.693289	0	0	0
															0	1	3	5	0	5						0	0.450268	0	0
															0	1	5	0	5	3						0	0	0	0
															4	5	5	4	1	1						1.24432		0	0
															0	0	1	5	3	5						0.655867		0	0
															0	0	1	0	0	0						0		0	0
															1	5	1	1	0	0						0		0	0
															5	5	5	0	0	1								0.842886	0
															0	5	5	5	5	5								0	0
															5	5	5	5	1	5									0.75392
															5	0	3	5	0	5									0
															1	5	4	5	5	0			Animal Mean	0.474283	0.376843	0.36202	0.234294	0.174426	0.17604
															1	1	5	1	5	5			Mean	0.404382			0.19492
															5	1	5	1	1	3			SEM	0.0352114			0.0196927
															3	5	0	0	0	3
															5	4	5	5	0	1
															0	5	5	0	5	1
															3	5	3	3	5	3
															5	5	5	3	3	0
															5	5	5	1	1	5
															3	5	0	2	3	2
															3	5	4	3	5	3
															3	5	3	5	5	1
															3	5	5	0	3	5
															3	5	1	0	3	3
															3	5	1	1	3	3
															5	5	5	1	1	0
															5	3	3	1	0	5
															5	5	3	1	0	0
															1	5	0	5	0	3
															5	5	5	0	0	5
															5	3	5	5	3	5
															5	3	5	5	5	3
															0	3	5	0	5	5
															0	5	3	0	5	5
															5	1	3	1	3	1
															5	0	5	5	1	5
															1	3	3	5	3	5
															0	1	0	5	3	5
															0	5	3	5	5	5
															5	5	1	5	0	5
															3	5	1	0	0	1
															5	0	5	1	0	0
															5	5	1	0	1	3
															5	5	5	3	0	1
															3	1	0	1	0	2
															5	1	0	1	1	0
															3	5		3	5	5
															1	5		0	0	0
															0	3		0	1	0
															1	5		0	5	3
															5	5		3	5
															1	5		5	1
															5	5		1	5
															1	0		1	5
															0	0		5	5
																0		0	5
																5		5	1
																5		4	5
																0		1	5
																5		3	3
																0		0	3
																5		0	5
																5		3	5
																5		3	5
																5		3	1
																0		5	1
																0		5	5
																5		5	5
																5		0	0
																4		5	5
																5		5	1
																3		3	3
																3		0	0
																0		1	3
																1		1	0
																5		5	0
																5		5	5
																5		1	1
																0		0	0
																5		5	5
																5		5	5
																1		0	5
																5		0	1
																5		0	5
																4		0	5
																5		1	5
																3		1	1
																		3	1
																		5	3
																		5	4
																		3	5
																		3	5
																		3	0
																		3	1
																		3	5
																		1	3
																		0	1
																		4	3
																		0	0
																		0	5
																		4	3
																		1	5
																		1
																		5
																		5
																		5
														Animal Mean	3.05263	3.22826	3.06294	2.53202	2.69849	2.78231
														Mean	3.11461			2.67094
														SEM	0.0569033			0.0735549

## Sheet: Fig 7-Sup Fig 1
Figure 7-Supplement Figure 1a							Figure 7-Supplement Figure 1g									Figure 7-Supplement Figure 1h
	Relative Nrxn1 mRNA levels		Relative Nrxn2 mRNA levels					Active Zone length (nm)									Docked vesicles diameter (nm)
	+inactive Cre	+Cre	+inactive Cre	+Cre				+inactive Cre			+Cre						+inactive Cre			+Cre
animal #1	0.837794	0.698017	0.893651	0.811006				animal #1	animal #2	animal #3	animal #1	animal #2	animal #3				animal #1	animal #2	animal #3	animal #1	animal #2	animal #3
animal #2	0.953519	0.798114	1.03607	0.7602				135.58	98.33	94.34	628.59	169.5	198.83				23.25	39.85	22.2	56.04	37.77	33.35
animal #3	1.23513	0.736113	1.16833	0.927306				107.39	116.92	178.91	425.74	142.54	110.29				22.29	29.89	27.81	48.44	34.04	42.19
animal #4	0.973554	0.623301	0.901949	0.585518				468.28	266.3	79.88	138.7	180.44	195.14				23.96	37.88	33.96	31.52	36.72	35.92
Mean	1	0.713886	1	0.771007				188.08	249.07	97.76	119.16	186.62	136.68				36.47	43.2	30.34	63.66	28.33	28.96
SEM	0.083894	0.0365672	0.0649106	0.0710355				108.71	433.13	78.41	232.09	215.45	198.33				31.61	33.89	56.39	40.87	34.37	33.51
								192.69	202.11	74.92	167.3	313.9	151.31				35.79	38.25	41.37	31.45	41.95	25.16
								100.89	129.35	203.22	174.04	373.9	90.03				62.07	23.61	28	28.18	31.01	28.3
Figure 7-Supplement Figure 1b								116.19	232.29	100.3	185.05	104.51	86.38				31.61	35.86	28.24	33.35	22.28	57.38
	Relative C1ql2 mRNA levels							183.71	150.07	95.17	118.77	443.36	188.4				45.05	46.99	35.73	46.74	38.63	36.49
	+inactive Cre	+Cre						192.35	175.5	95.44	194.99	183.2	185.01				36.44	26.68	36.44	30.23	33.96	39.1
animal #1	0.595081	0.505047						211.95	90.75	66.24	265.73	298.83	214.71				26.49	36.44	33.35	36.11	53.88	26.27
animal #2	1.46188	0.792504						360.52	134.56	111.32	164.74	189.38	92.58				35.59	40.87	35.15	34.37	30.12	49.84
animal #3	1.3452	0.879339						216.97	92.8	82.93	136.12	133.67	257.26				27.75	55.19	30.12	30.78	38.09	50.53
animal #4	0.597837	1.02183						128.06	97.13	41.37	334.49	281.92	208.94				49.16	33.35	32.94	47.8	49.78	33.51
Mean	1	0.79968						268.37	267.17	82.12	116.79	191.16	209.25				35.35	98.13	35.73	35.35	50.33	29.25
SEM	0.234199	0.108994						384.12	552.3	207.6	290.46	122.5	205.07				38.63	42.23	33.96	33.51	23.69	26.3
								261.74	38.68	290.91	86.8	668.6	204.29				39.33	43.03	47.17	58.3	39.03	29.83
								92.8	412.04	151.21	269.99	194.47	85.43				60.18	40.74	28.18	47.8	25.07	30.63
								106.02	241.05	135.85	224.53	99.98	109.89				33.38	31.96	53.37	35.96	37.88	35.79
Figure 7-Supplement Figure 1d								460.65	128.03	120.68	128.74	146.73	123.17				50.19	56.83	28.96	36.87	26.27	32.73
Data included in source data Figure 7 file								130.35	213.81	172.13	199.52	282.23	106.02				48.61	58.93	41.37	42.23	33.96	34.41
								93.92	101.61	181.46	126.2	167.98	222.54				29.86	42.87	38.9	51.27	24.12	34.91
								104.66	244.02	132.76	142.34	158.94	68.23				23.61	33.23	50.8	33.38	33.89	34.01
								171.69	489.91	213.78	192.41	393.32	149.16				44.75	42.36	38.93	41.83	28.33	43.03
Figure 7-Supplement Figure 1e-f								500.39	121.99	198.34	323.94	160.1	171.65				32.78	53.68	44.79	31.49	26.91	45.36
Data included in source data Figure 7 file								164.23	573.3	198.09	183.74	353.22	119.44				55.99	33.39	55.56	30.23	53.52	52.13
								152.87	102.25	135.7	162.85	251.59	101.48				33.35	40.15	49.29	31.67	26.91	25.9
								458.65	96.87	91.2	114.23	220.84	92.51				39.85	38.25	68.82	40.06	56.85	35.1
								282.26	111.4	101	470.54	177.09	124.11				35.35	34.69	43.53	38.93	50.52	34.01
								225.55	235.28	123.42	114.23	160.1	171.83				32.73	31.96	41.83	44.54	42.49	34.69
								161.21	337.16	124.39	130.35	400.68	145.82				34.12	39.39	32.88	27.53	36.87	36.7
								78.49	117.48	95.51	298.35	177.7	587.96				32.89	46.64	37.23	30.06	39.03	41.58
								127.16	131.57	229.45	108.58	179.72	115.58				42.36	34.69	32.31	35.49	33.64
								345.2	226.97	109.33	115.88	126.38	51.69				42.36	29.83	31.94	65.76	40.61
								71.18	126.53	104.66	127.56	142.54	213.98				33.64	32.31	35.59	34.76	47.22
								147.73	113.17	137.71	106.51	146.95	79.88				26.79	29.83	37.05	33.23	24.89
								251.39	37.88	152.47	156.27	223.74	87.41				45.62	21.58	34.11	27.5
								102.34	228.97	265.59	178.94	188.39	116.25				28.29	27.75	68.3	38.53
								114.84	122.54	130.82	130.92	122.23	350.08				35.59	43.15	35.32	34.93
								292.09	350.06	113.34	177.72	55.63	102.68				45.36	31.96	31.61	31.96
								140.81	74.1	339.9	171.69	216.84	201.25				28.18	43.7	45.13	34.04
								162.79	145.78	124.95	186.54	143.69	144.12				30.12	40.42	33.89	34.04
								74.59	254.99	329.15	206.03	329.14	48.1				43.66	40.2	43.7	63.87
								103.06	130.44	417.98	499.37	116.99	210.03				39.25	40.61	37.96	33.08
								150.37	160.68	82.92	325.8	166.6	48.25				51.6	29.86	41.95	27.75
								103.3	153.87	74.12	400.09	73	370.97				26.3	53.83	30.12	43.98
								231.68	90.11	101.04	185.15	151.5	89.11				33.3	29.25	38.14	28.72
								359.15	117.01	182.8	237.9	86.88	212.57				35.54	30.51	43.2
								304.47	236.93	108.12	294.09	129.1	130.27				34.01	29.72	58.12
								370.77	133.47	186.12	94.42	278.02	121.97				36.86	35.55	48.56
								123.22	133.71	94.95	129.9	138.84	118.77				32.73	26.58	37.23
								181.9	378.19	148.25	343.56	160.39	171.91				28.96	34.69	40.74
								265.39	125.84	137.8	88.14	257.67	313.47				43.31	35.24	59.72
								115.24	215.04	192.21	349.49	166.87	185.38				32.36	36.7	26.16
								145.45	118.25	468.32	456.79	167.34	222.91				32.78	31.96	37.59
								355.33	124.06	134.08	164.01	188.72	76.17				51.53	36.7	32.98
								216.06	183.45	141.39	134.2	170.98	150.53				54.85	29.06	37.88
								199.34	395.95	176.88	248.43	173.57	167.99				36.7	35.86	38.25
								181.2	167.88	183.02	107.66	79.47	157.45				45.19	31.35	31.67
								234.58	214.33	126.06	370.23	80.05	159.8				40.15	28.29
								47.17	275.87	346.56	193.88	66.84	99.43				26.16	41.03
								159.82	140.28	194.99	303.81	360.84	193.32				26.16	36.78
								153.68	160.2	70.69	345.06	235	148.19				29.83	32.94
								136.16	217.63	111.32	118.47	225.6	118.47				29.83	30.79
								123.22	199.35	94.34	168.19	249.76	109.6				25.9	40.15
								176.43	177.97	87.95	55.5	275.37	317.59				48.25	60.83
								109.7	188.8	121.72	126.03	61.27	136.32				38.5	32.73
								108.49	218.99	609.74	264.87	320.4	109.27				49.26	33.89
								107.15	182.25	401.95	155.07	358.08	130.82				40.01	35.32
								142.22	285.99	372.45	135.54	132.19	166.68				41.63	48.38
								616.26	394.86	87.41	202.06	289.12	94.56				43.32	40.15
								112.97	321.65	111.07	122.54	194.85	197.37				48.89
								101.66	241	185.48	160.16	284.01	89.47				59.16
								123.1	192.94	306.37	132.41	229.45	194.43			Animal Mean	37.7092	38.2335	39.1959	38.6849	36.4711	36.1522
								146.52	99.34	139.29	206.13	183.34	102.47			Mean	38.3795			37.1027
								171.22	153.33	80.33	229.06	247.44	123.07			SEM	0.435355			0.796421
								89.5	426.19	176.38	109.66	249.99	260.73
								222.69	134.56	462.15	260.15	235.21	214.2
								132	118.91	311.42	211.2	201.38	176.55
								248.56	138.34	329.48	187.61	181.43	178
								137.36	117.85	169.49	205.96	152.83	125.7
								118.78	103.49	128.34	319.85	122.5	128.29
								166.94	161.5	108.49	233.73	114.89	316.7
								185.01	407.46	99.13	135.93	126.68	311.86
								605.5	143.9	129.29	129.9	140.07	192.49
								275.62	195.72	193.62	189.94	234.3	209.32
								297.25	302.51	186.55	133.63	84.46	268.22
								231.18	374.67	356.61	126.2	188.08	382.86
									220.75	624.82	149.01	201.84	236.07
									484.66	125.19	133.53	167.36	52.98
									122.99	88	130.82	217.68	183.59
									76.49	319.22	114.29	44.58	55.99
									198.17	73.26	143.93	213.77	208.79
									116.72	416.42	176.88	321.93	49.34
									190.34	121.11	124.05	124.19	209.74
									138.21	321.84	105.25	199.06	174.04
									125.33	144.24	170.57	172.05	118.25
										181.57	222.09	112.97	148.93
										96.76	126.03	165.48	96.84
										160.73		157.08	134.54
										152.47		267.31	118.64
										424.45		219.88	219.85
										112.87		391.64	118.47
												118.64	216.9
												214.33	145.96
													132.64
													270.95
							Animal Mean	199.161	200.965	179.469	199.155	200.58	165.596
							Mean	193.198			188.444
							SEM	6.88426			11.4311
