# Supplementary figures and images for: Regulation of hippocampal mossy fiber-CA3 synapse function by a Bcl11b/C1ql2/Nrxn3(25b+) pathway
Source: eLife journal article supplement (doi:10.7554/elife.89854), 2023-08-18

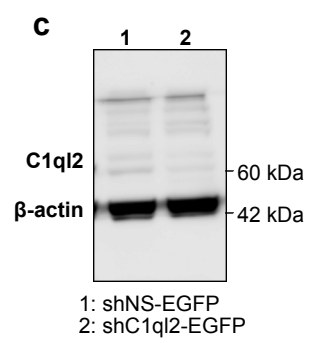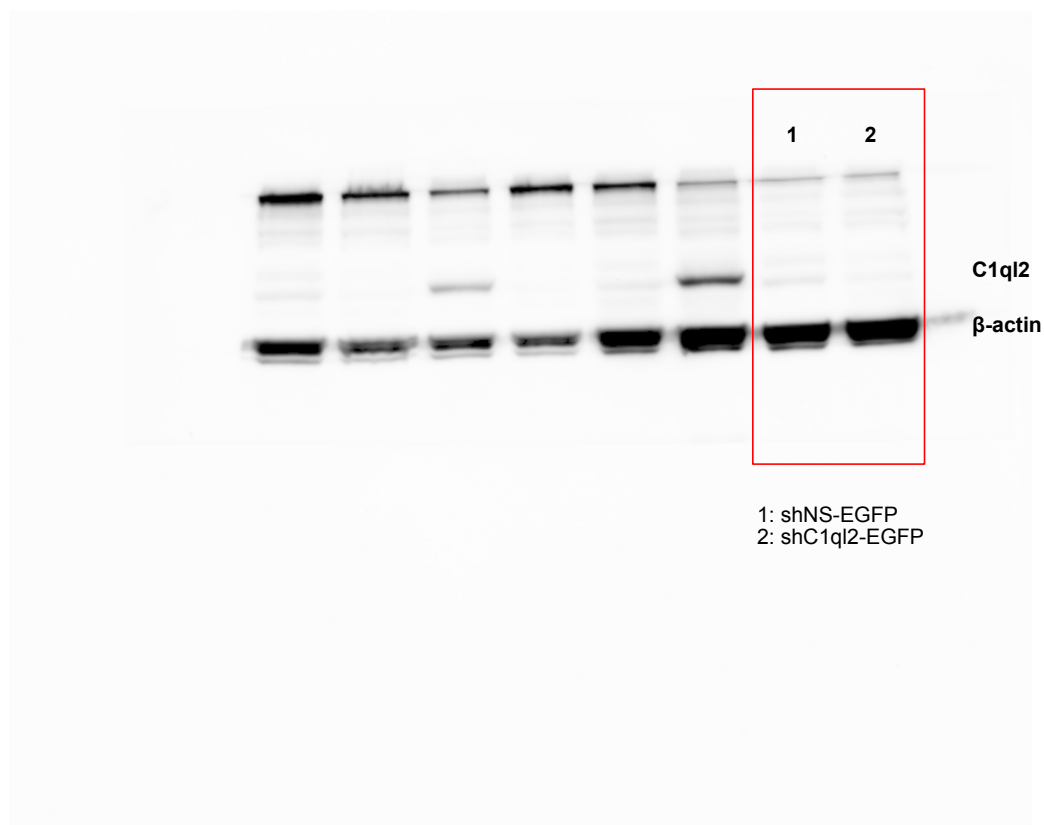

Supplement: fig4-data3 [file elife-89854-fig4-data3-v1.zip]

**b**

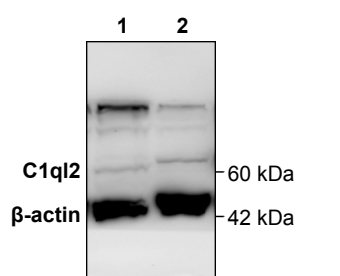

1: Control+EGFP  
2: Bcl11b cKO+EGFP-2A-K262E

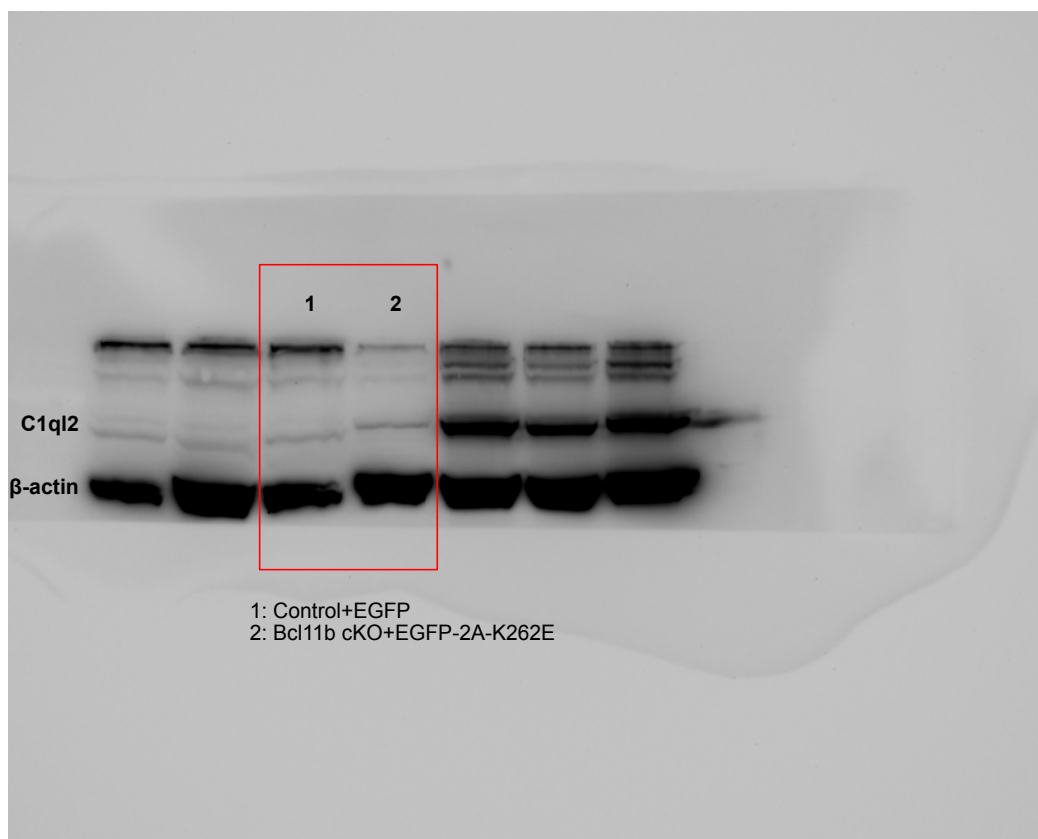

Supplement: fig6-data3 [file elife-89854-fig6-data3-v1.zip]

**k**

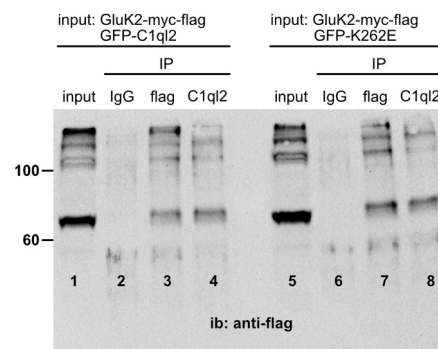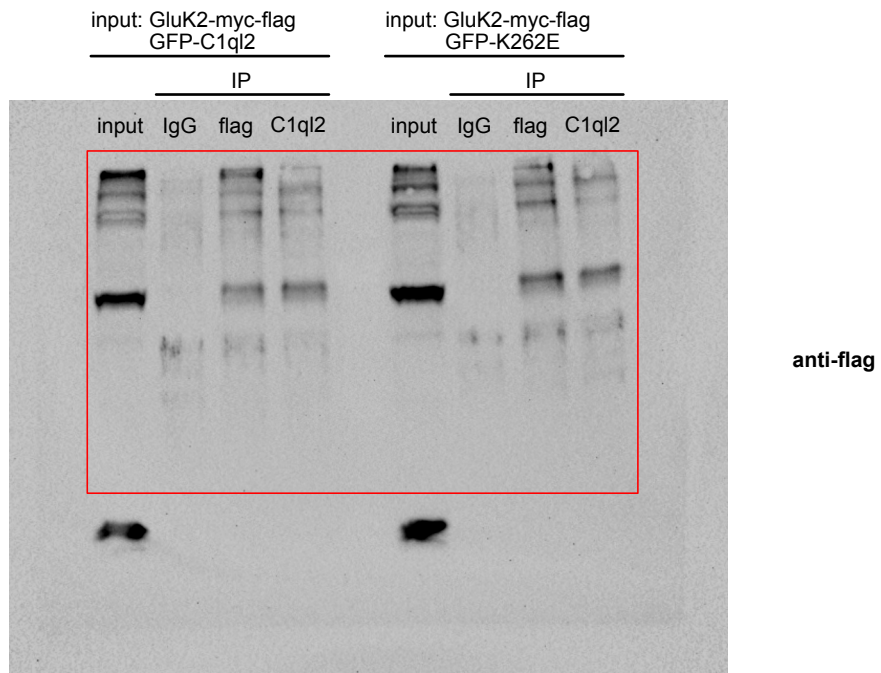

Supplement: fig6-figsupp1-data2 [file elife-89854-fig6-figsupp1-data2-v1.zip]
